# Supplementary material for: Integration of simulated annealing into pigeon inspired optimizer algorithm for feature selection in network intrusion detection systems
Source: PeerJ journal article supplement (doi:10.7717/peerj-cs.2176), 2024-07-16
Supplement: code_and_data.zip [file CIC-IDS-2017.xlsx]

## Sheet: SABPIO
TPR	FPR	fitness	acc	F1	precision	左RF右DT	TPR	FPR	fitness	acc	F1	precision
0.99897	0.003	0.531357	0.998139	0.997925	0.994404		0.99892	0.006	0.532157	0.997323	0.995925	0.993879
0.99897	0.003	0.531346	0.99813	0.997893	0.994399		0.99892	0.006	0.532126	0.997305	0.995899	0.993872
0.99897	0.003	0.531299	0.998113	0.997932	0.994406		0.99892	0.006	0.532021	0.997305	0.995898	0.993877
0.99897	0.004	0.531349	0.998095	0.997976	0.994414		0.99892	0.006	0.532007	0.997305	0.995898	0.993883
0.99897	0.003	0.531349	0.998087	0.997888	0.994398		0.99892	0.006	0.532098	0.997305	0.995898	0.993889
0.99897	0.003	0.531403	0.998078	0.997888	0.994398		0.99892	0.006	0.532024	0.997297	0.995885	0.993876
0.99897	0.004	0.531139	0.998078	0.997979	0.994414		0.99892	0.006	0.532098	0.997297	0.995885	0.993878
0.99897	0.003	0.531199	0.998078	0.997938	0.994407		0.99892	0.006	0.532095	0.997297	0.995885	0.99387
0.99897	0.002	0.531371	0.998069	0.997877	0.994396		0.99892	0.006	0.532143	0.997297	0.995884	0.993869
0.99897	0.003	0.531257	0.998069	0.997927	0.994405		0.99892	0.006	0.532153	0.997288	0.995872	0.993887
0.99897	0.003	0.531286	0.998069	0.997877	0.994396		0.99892	0.006	0.532132	0.997288	0.995872	0.993892
0.99897	0.004	0.531274	0.998069	0.997877	0.994396		0.99892	0.006	0.532087	0.997288	0.995871	0.993879
0.99897	0.003	0.531313	0.99806	0.997912	0.994402		0.99892	0.006	0.532124	0.997279	0.995858	0.993889
0.99897	0.003	0.5313	0.998051	0.997804	0.994383		0.99892	0.006	0.532155	0.997279	0.995858	0.993883
0.99897	0.004	0.531318	0.998051	0.997814	0.994384		0.99892	0.006	0.532101	0.997279	0.995858	0.993874
0.99897	0.004	0.531232	0.998051	0.997872	0.994395		0.99892	0.006	0.532095	0.997279	0.995858	0.993883
0.99897	0.003	0.531165	0.998051	0.997849	0.994391		0.99892	0.006	0.532098	0.99727	0.995845	0.993894
0.99897	0.003	0.531295	0.998051	0.997916	0.994403		0.99892	0.006	0.532152	0.99727	0.995845	0.99388
0.99897	0.003	0.53131	0.998043	0.997855	0.994392		0.99892	0.006	0.532109	0.99727	0.995844	0.993894
0.99897	0.003	0.53131	0.998043	0.997829	0.994387		0.99892	0.006	0.532149	0.997262	0.995832	0.993856
0.99897	0.003	0.531253	0.998043	0.997973	0.994413		0.99892	0.006	0.53217	0.997262	0.995832	0.993887
0.99897	0.003	0.531266	0.998043	0.997889	0.994398		0.99892	0.006	0.532072	0.997262	0.995832	0.993881
0.99897	0.004	0.531332	0.998043	0.997903	0.994401		0.99892	0.006	0.532134	0.997262	0.995832	0.993877
0.99897	0.003	0.531244	0.998043	0.997829	0.994387		0.99892	0.006	0.532138	0.997262	0.995831	0.993881
0.99897	0.003	0.531403	0.998034	0.997873	0.994395		0.99892	0.006	0.532117	0.997262	0.995831	0.993862
0.99897	0.003	0.531522	0.998034	0.997906	0.994401		0.99892	0.006	0.532098	0.997253	0.995819	0.993878
0.99897	0.004	0.531426	0.998025	0.997842	0.99439		0.99892	0.006	0.532157	0.997253	0.995819	0.993883
0.99897	0.003	0.531304	0.998025	0.997919	0.994403		0.99892	0.006	0.532126	0.997253	0.995818	0.993893
0.99897	0.003	0.531452	0.998025	0.99787	0.994395		0.99892	0.006	0.532081	0.997253	0.995818	0.993875
0.99897	0.003	0.531378	0.998025	0.997885	0.994397		0.99892	0.006	0.532161	0.997253	0.995818	0.993873
0.99897	0.003	0.531352	0.998025	0.99787	0.994395		0.99892	0.006	0.532126	0.997253	0.995818	0.993875
0.99897	0.003	0.531388	0.998025	0.997993	0.994417		0.99892	0.006	0.532217	0.997253	0.995818	0.993888
0.99897	0.003	0.531382	0.998016	0.997899	0.9944		0.99892	0.006	0.532072	0.997253	0.995818	0.993883
0.99897	0.004	0.531283	0.998016	0.997847	0.99439		0.99892	0.006	0.532132	0.997253	0.995817	0.993875
0.99897	0.003	0.531371	0.998016	0.997941	0.994407		0.99892	0.006	0.532163	0.997244	0.995805	0.993885
0.99897	0.003	0.531195	0.998016	0.997839	0.994389		0.99892	0.006	0.53203	0.997244	0.995805	0.993881
0.99897	0.003	0.531386	0.998016	0.99791	0.994402		0.99892	0.006	0.532016	0.997244	0.995805	0.993889
0.99897	0.003	0.531322	0.998016	0.997802	0.994382		0.99892	0.006	0.532163	0.997244	0.995805	0.993874
0.99897	0.003	0.531548	0.998008	0.997834	0.994388		0.99892	0.006	0.532115	0.997244	0.995805	0.993877
0.99897	0.004	0.531378	0.998008	0.99791	0.994402		0.99892	0.006	0.532044	0.997244	0.995805	0.993876
0.99897	0.003	0.531331	0.998008	0.997937	0.994407		0.99892	0.006	0.532119	0.997244	0.995805	0.993867
0.99897	0.003	0.531262	0.998008	0.997909	0.994402		0.99892	0.006	0.532098	0.997244	0.995804	0.993883
0.99897	0.004	0.531303	0.998008	0.997894	0.994399		0.99892	0.006	0.532129	0.997235	0.995792	0.993882
0.99897	0.003	0.531348	0.998008	0.997885	0.994397		0.99892	0.006	0.532041	0.997235	0.995791	0.99388
0.99897	0.003	0.531304	0.997999	0.997826	0.994387		0.99892	0.006	0.532141	0.997235	0.995791	0.993878
0.99897	0.003	0.53142	0.997999	0.997864	0.994394		0.99892	0.006	0.532149	0.997235	0.995791	0.996835
0.99897	0.004	0.53122	0.997999	0.997877	0.994396		0.99892	0.006	0.53214	0.997235	0.995791	0.996859
0.99897	0.003	0.531389	0.997999	0.997953	0.99441		0.99892	0.006	0.532126	0.997235	0.995791	0.996995
0.99897	0.003	0.531275	0.997999	0.997917	0.994403		0.99892	0.006	0.532149	0.997235	0.995791	0.996931
0.99897	0.004	0.531333	0.997999	0.997812	0.994384		0.99892	0.006	0.532089	0.997235	0.995791	0.996741
0.99897	0.003	0.531336	0.99799	0.997916	0.994403		0.99892	0.006	0.53212	0.997235	0.995791	0.996929
0.99897	0.002	0.531355	0.99799	0.997881	0.994397		0.99892	0.006	0.532061	0.997226	0.995778	0.996865
0.99897	0.003	0.531254	0.99799	0.997866	0.994394		0.99892	0.006	0.532132	0.997226	0.995778	0.996839
0.99897	0.003	0.53133	0.99799	0.997931	0.994406		0.99892	0.006	0.532067	0.997226	0.995778	0.996955
0.99897	0.003	0.531207	0.99799	0.997952	0.994409		0.99892	0.006	0.532078	0.997226	0.995778	0.996993
0.99897	0.003	0.531176	0.99799	0.997947	0.994408		0.99892	0.006	0.532132	0.997226	0.995778	0.996984
0.99897	0.005	0.531414	0.99799	0.997858	0.994392		0.99892	0.006	0.532092	0.997226	0.995778	0.996824
0.99897	0.003	0.531362	0.99799	0.997885	0.994397		0.99892	0.006	0.532129	0.997226	0.995778	0.996872
0.99897	0.003	0.531506	0.99799	0.997917	0.994403		0.99892	0.006	0.532144	0.997226	0.995778	0.99693
0.99897	0.004	0.531225	0.997981	0.997949	0.994409		0.99892	0.006	0.53214	0.997226	0.995778	0.996988
0.99897	0.003	0.531247	0.997981	0.997876	0.994396		0.99892	0.006	0.532155	0.997226	0.995778	0.996857
0.99897	0.003	0.531302	0.997981	0.997891	0.994398		0.99892	0.006	0.532132	0.997226	0.995777	0.996883
0.99897	0.004	0.531448	0.997981	0.997845	0.99439		0.99892	0.006	0.532047	0.997218	0.995765	0.9968
0.99897	0.004	0.531423	0.997981	0.99784	0.994389		0.99892	0.006	0.532064	0.997218	0.995765	0.996792
0.99897	0.003	0.531324	0.997972	0.997941	0.994407		0.99892	0.006	0.532058	0.997218	0.995765	0.996973
0.99897	0.003	0.531258	0.997972	0.997968	0.994412		0.99892	0.006	0.532092	0.997218	0.995765	0.997022
0.99897	0.003	0.531352	0.997972	0.997896	0.994399		0.99892	0.006	0.532061	0.997218	0.995765	0.996894
0.99897	0.003	0.531202	0.997972	0.99795	0.994409		0.99892	0.006	0.532118	0.997218	0.995765	0.99699
0.99897	0.003	0.531217	0.997964	0.997918	0.994403		0.99892	0.006	0.532075	0.997218	0.995765	0.996933
0.99897	0.004	0.531444	0.997964	0.997868	0.994394		0.99892	0.006	0.532139	0.997218	0.995765	0.996842
0.99897	0.003	0.531219	0.997964	0.997918	0.994403		0.99892	0.006	0.532098	0.997218	0.995765	0.996933
0.99897	0.004	0.531253	0.997964	0.997977	0.994414		0.99892	0.006	0.532044	0.997218	0.995764	0.997038
0.99897	0.004	0.531331	0.997964	0.997898	0.9944		0.99892	0.006	0.532098	0.997218	0.995764	0.996897
0.99897	0.003	0.531366	0.997964	0.997978	0.994414		0.99892	0.006	0.532055	0.997218	0.995764	0.997041
0.99897	0.004	0.531205	0.997964	0.997769	0.994376		0.99892	0.006	0.532183	0.997218	0.995764	0.996664
0.99897	0.003	0.531433	0.997964	0.997941	0.994407		0.99892	0.006	0.532084	0.997218	0.995764	0.996974
0.99897	0.003	0.531367	0.997964	0.997904	0.994401		0.99892	0.006	0.532129	0.997218	0.995764	0.996908
0.99897	0.003	0.531369	0.997955	0.997885	0.994397		0.99892	0.006	0.532152	0.997218	0.995764	0.996873
0.99897	0.003	0.531199	0.997955	0.997905	0.994401		0.99892	0.006	0.532101	0.997218	0.995764	0.996908
0.99897	0.003	0.531331	0.997955	0.997801	0.994382		0.99892	0.006	0.532095	0.997218	0.995764	0.996721
0.99897	0.003	0.531183	0.997955	0.997889	0.994398		0.99892	0.006	0.532076	0.997209	0.995752	0.99688
0.99897	0.004	0.53131	0.997955	0.997918	0.994403		0.99892	0.006	0.532109	0.997209	0.995751	0.996932
0.99897	0.004	0.531319	0.997955	0.997974	0.994413		0.99892	0.006	0.532084	0.997209	0.995751	0.997033
0.99897	0.003	0.531231	0.997946	0.997874	0.994395		0.99892	0.006	0.53199	0.997209	0.995751	0.996853
0.99897	0.004	0.53132	0.997946	0.99786	0.994393		0.99892	0.006	0.532189	0.997209	0.995751	0.996827
0.99897	0.004	0.531426	0.997946	0.997875	0.994395		0.99892	0.006	0.532078	0.997209	0.995751	0.996855
0.99897	0.003	0.531242	0.997937	0.997946	0.994408		0.99892	0.006	0.532146	0.997209	0.995751	0.996982
0.99897	0.003	0.531363	0.997937	0.997916	0.994403		0.99892	0.006	0.532101	0.997209	0.995751	0.99693
0.99897	0.003	0.531245	0.997937	0.997874	0.994395		0.99892	0.006	0.532181	0.997209	0.995751	0.996852
0.99897	0.003	0.531332	0.997937	0.997926	0.994405		0.99892	0.006	0.532061	0.997209	0.995751	0.996946
0.99897	0.003	0.531488	0.997937	0.997905	0.994401		0.99892	0.006	0.532126	0.997209	0.995751	0.996909
0.99897	0.003	0.531373	0.997937	0.997948	0.994409		0.99892	0.006	0.532084	0.997209	0.995751	0.996987
0.99897	0.003	0.531313	0.997937	0.997865	0.994394		0.99892	0.006	0.532149	0.997209	0.995751	0.996837
0.99897	0.003	0.531301	0.997937	0.997884	0.994397		0.99892	0.006	0.532158	0.997209	0.995751	0.996871
0.99897	0.004	0.531372	0.997937	0.99788	0.994396		0.99892	0.006	0.532075	0.997209	0.995751	0.996865
0.99897	0.003	0.531281	0.997937	0.997827	0.994387		0.99892	0.006	0.532058	0.997209	0.995751	0.996768
0.99897	0.004	0.531255	0.997937	0.997915	0.994403		0.99892	0.006	0.532183	0.9972	0.995738	0.996927
0.99897	0.003	0.53123	0.997937	0.997913	0.994402		0.99892	0.006	0.532155	0.9972	0.995738	0.996923
0.99897	0.003	0.531242	0.997937	0.9979	0.9944		0.99892	0.006	0.532055	0.9972	0.995738	0.9969
0.99897	0.003	0.531405	0.997929	0.997888	0.994398		0.99892	0.006	0.532081	0.9972	0.995738	0.996879
0.99897	0.00325	0.531319	0.998001	0.997895	0.994399		0.99892	0.006	0.532109	0.99724	0.995798	0.99554
8.13255e-08	0.000497494	8.13233e-05	4.8303e-05	4.51808e-05	8.13255e-06		8.13255e-08	4.33681e-18	4.41004e-05	3.00085e-05	4.57267e-05	0.00150316

## Sheet: CPIO
TPR	FPR	fitness	acc	F1	precision	左RF右DT	TPR	FPR	fitness	acc	F1	precision
0.997	0.01	0.522401	0.994918	0.99227	0.985971		0.996	0.013	0.523148	0.994321	0.991356	0.985396
0.996	0.009	0.52229	0.995067	0.992498	0.986104		0.996	0.013	0.523184	0.994312	0.991345	0.985066
0.996	0.011	0.52247	0.995023	0.992428	0.986594		0.996	0.013	0.523161	0.994312	0.991343	0.985313
0.996	0.011	0.522446	0.995094	0.992534	0.986846		0.996	0.013	0.52326	0.994304	0.991331	0.985107
0.996	0.01	0.522378	0.994874	0.992201	0.986091		0.996	0.013	0.523173	0.994304	0.99133	0.985189
0.996	0.011	0.522508	0.9949	0.992241	0.986216		0.996	0.013	0.523119	0.994295	0.991317	0.985147
0.996	0.01	0.522545	0.995234	0.992753	0.986279		0.996	0.013	0.523176	0.994286	0.991304	0.985023
0.997	0.011	0.522391	0.995199	0.9927	0.986031		0.996	0.013	0.523145	0.994286	0.991304	0.985065
0.997	0.011	0.522369	0.994997	0.992388	0.986428		0.996	0.013	0.523085	0.994286	0.991304	0.985065
0.996	0.01	0.522308	0.994918	0.992267	0.986341		0.996	0.013	0.52317	0.994286	0.991304	0.985106
0.997	0.01	0.522417	0.995243	0.992761	0.987226		0.996	0.013	0.523108	0.994286	0.991303	0.98527
0.996	0.011	0.52233	0.995067	0.992492	0.987092		0.996	0.013	0.523175	0.994277	0.99129	0.985228
0.997	0.011	0.522591	0.9949	0.992238	0.986751		0.996	0.013	0.523212	0.994269	0.991276	0.985228
0.996	0.011	0.522318	0.995208	0.99271	0.986689		0.996	0.013	0.523232	0.99426	0.991265	0.984898
0.997	0.011	0.522279	0.995058	0.99248	0.986803		0.996	0.013	0.523181	0.99426	0.991265	0.984898
0.997	0.01	0.522374	0.994944	0.992309	0.986219		0.996	0.013	0.523184	0.99426	0.991264	0.984981
0.997	0.01	0.522431	0.995015	0.992413	0.9868		0.996	0.013	0.523192	0.99426	0.991264	0.984981
0.996	0.01	0.522542	0.995146	0.992613	0.987261		0.996	0.013	0.523149	0.99426	0.991264	0.985063
0.996	0.011	0.52245	0.994883	0.992213	0.986462		0.996	0.013	0.523257	0.99426	0.991264	0.985063
0.996	0.011	0.522447	0.995234	0.992747	0.987267		0.996	0.013	0.523263	0.994251	0.991251	0.984898
0.996	0.01	0.52227	0.994909	0.992253	0.986464		0.996	0.013	0.523243	0.994251	0.991251	0.98498
0.996	0.011	0.522493	0.995146	0.992614	0.986973		0.996	0.013	0.523199	0.994251	0.99125	0.985021
0.996	0.01	0.522244	0.994953	0.992322	0.986302		0.996	0.013	0.523238	0.994251	0.99125	0.985021
0.996	0.01	0.522334	0.995199	0.992699	0.986318		0.996	0.013	0.523153	0.994251	0.99125	0.985062
0.997	0.011	0.522082	0.99483	0.992135	0.985924		0.996	0.013	0.523167	0.994251	0.991249	0.985185
0.997	0.01	0.522122	0.994988	0.992373	0.986716		0.996	0.013	0.523179	0.994251	0.991249	0.985226
0.997	0.011	0.5227	0.995155	0.992626	0.987262		0.996	0.013	0.523255	0.994242	0.991238	0.984938
0.997	0.011	0.52249	0.994953	0.992316	0.987291		0.996	0.013	0.523131	0.994242	0.991238	0.984938
0.997	0.01	0.522271	0.994716	0.991961	0.98567		0.996	0.013	0.523143	0.994242	0.991237	0.984979
0.997	0.011	0.522485	0.99505	0.992471	0.986021		0.996	0.013	0.52317	0.994242	0.991237	0.98502
0.997	0.01	0.522233	0.995173	0.992654	0.987139		0.996	0.013	0.523182	0.994242	0.991236	0.985102
0.997	0.011	0.522166	0.994971	0.99235	0.986098		0.996	0.013	0.523311	0.994233	0.991225	0.984774
0.997	0.012	0.522563	0.99505	0.992468	0.986555		0.996	0.013	0.523251	0.994233	0.991225	0.984856
0.997	0.012	0.522435	0.995076	0.99251	0.986351		0.996	0.013	0.52322	0.994233	0.991224	0.984897
0.996	0.011	0.522274	0.994936	0.992294	0.986465		0.996	0.013	0.523214	0.994233	0.991224	0.984938
0.996	0.011	0.522351	0.994778	0.992055	0.985838		0.996	0.013	0.523302	0.994233	0.991224	0.984979
0.996	0.01	0.522247	0.995129	0.99259	0.98656		0.996	0.013	0.523125	0.994233	0.991223	0.985061
0.996	0.011	0.522488	0.994979	0.99236	0.986715		0.996	0.013	0.523187	0.994233	0.991223	0.985061
0.997	0.011	0.522267	0.995067	0.992498	0.986145		0.996	0.013	0.523235	0.994233	0.991223	0.985102
0.997	0.011	0.522437	0.99505	0.992468	0.986596		0.996	0.013	0.523058	0.994225	0.991211	0.984814
0.997	0.01	0.52235	0.99512	0.992577	0.986436		0.996	0.013	0.523154	0.994225	0.991211	0.984814
0.997	0.011	0.522732	0.995392	0.992988	0.987524		0.996	0.013	0.523153	0.994225	0.991211	0.984855
0.997	0.01	0.522422	0.995085	0.992521	0.986722		0.996	0.013	0.523111	0.994225	0.991211	0.984937
0.996	0.011	0.522533	0.994953	0.992316	0.987208		0.996	0.013	0.523179	0.994225	0.991211	0.984937
0.997	0.01	0.522354	0.994988	0.992373	0.986675		0.996	0.013	0.523217	0.994225	0.991209	0.985101
0.997	0.011	0.522394	0.994821	0.992123	0.985636		0.996	0.013	0.523144	0.994216	0.991198	0.984813
0.996	0.011	0.522403	0.995094	0.992537	0.98627		0.996	0.013	0.523131	0.994216	0.991198	0.984854
0.997	0.011	0.522702	0.995058	0.992478	0.987174		0.996	0.013	0.523185	0.994216	0.991197	0.984895
0.997	0.011	0.522158	0.994874	0.992199	0.986544		0.996	0.013	0.523167	0.994216	0.991197	0.984895
0.997	0.011	0.522587	0.995111	0.992559	0.987259		0.996	0.013	0.523174	0.994216	0.991197	0.984936
0.996	0.011	0.522433	0.995023	0.992425	0.98713		0.996	0.013	0.52313	0.994216	0.991197	0.984936
0.997	0.011	0.522335	0.995225	0.992735	0.987101		0.996	0.013	0.52315	0.994216	0.991197	0.984936
0.996	0.01	0.522562	0.995243	0.99276	0.987309		0.996	0.013	0.523266	0.994216	0.991197	0.984977
0.996	0.01	0.522306	0.995067	0.992494	0.986803		0.996	0.013	0.523243	0.994216	0.991196	0.985018
0.997	0.01	0.522421	0.995146	0.992617	0.986479		0.996	0.013	0.523142	0.994216	0.991196	0.985018
0.996	0.01	0.522269	0.995252	0.992776	0.986897		0.996	0.013	0.523175	0.994216	0.991196	0.985018
0.997	0.011	0.522237	0.995155	0.992626	0.987344		0.996	0.013	0.523108	0.994216	0.991196	0.985018
0.997	0.011	0.52248	0.995015	0.992411	0.98713		0.996	0.013	0.523172	0.994216	0.991196	0.985142
0.996	0.01	0.522467	0.995015	0.992414	0.986635		0.996	0.013	0.523215	0.994207	0.991185	0.984649
0.997	0.011	0.522619	0.995006	0.992404	0.985936		0.996	0.013	0.523212	0.994207	0.991184	0.984813
0.996	0.01	0.522437	0.995076	0.992507	0.986886		0.996	0.013	0.523181	0.994207	0.991184	0.984895
0.997	0.01	0.522437	0.994918	0.992268	0.9863		0.996	0.013	0.523212	0.994207	0.991184	0.984936
0.997	0.01	0.52224	0.994997	0.99239	0.98614		0.996	0.013	0.523248	0.994207	0.991184	0.984936
0.996	0.01	0.522219	0.994936	0.992293	0.986506		0.996	0.013	0.523247	0.994207	0.991183	0.984977
0.997	0.011	0.522629	0.995076	0.992507	0.986804		0.996	0.013	0.523133	0.994207	0.991183	0.984977
0.996	0.01	0.522289	0.994927	0.992279	0.986671		0.996	0.013	0.52317	0.994207	0.991183	0.985018
0.997	0.011	0.522332	0.994786	0.992065	0.986373		0.996	0.013	0.523187	0.994207	0.991182	0.985141
0.996	0.011	0.522707	0.994979	0.992358	0.987004		0.996	0.013	0.523167	0.994198	0.991173	0.984566
0.997	0.011	0.522349	0.995208	0.99271	0.98673		0.996	0.013	0.523184	0.994198	0.991171	0.984853
0.997	0.011	0.522265	0.99505	0.992468	0.986555		0.996	0.013	0.523199	0.994198	0.99117	0.984894
0.996	0.011	0.522294	0.994988	0.992372	0.986881		0.996	0.013	0.523071	0.994198	0.99117	0.984894
0.996	0.011	0.522416	0.995137	0.992601	0.986972		0.996	0.013	0.523197	0.994198	0.991169	0.985017
0.997	0.01	0.522598	0.995102	0.992546	0.987053		0.996	0.013	0.523161	0.994198	0.991169	0.985017
0.997	0.01	0.522381	0.995032	0.992441	0.986636		0.996	0.013	0.523151	0.994198	0.991169	0.985017
0.997	0.011	0.522417	0.995023	0.992427	0.986677		0.996	0.013	0.523173	0.994198	0.991169	0.985058
0.997	0.011	0.522643	0.995199	0.992697	0.986565		0.996	0.013	0.523221	0.994198	0.991169	0.985099
0.997	0.011	0.522236	0.995295	0.992843	0.986982		0.996	0.013	0.523182	0.994198	0.991169	0.98514
0.996	0.01	0.522467	0.995252	0.992773	0.987474		0.996	0.013	0.5231	0.994198	0.991169	0.98514
0.997	0.01	0.522421	0.995067	0.992496	0.986351		0.996	0.013	0.523223	0.99419	0.991159	0.984565
0.997	0.01	0.522584	0.995085	0.992521	0.986845		0.996	0.013	0.523307	0.99419	0.991158	0.98477
0.997	0.011	0.522328	0.994839	0.992145	0.986541		0.996	0.013	0.523192	0.99419	0.991158	0.98477
0.997	0.011	0.522393	0.99505	0.992469	0.986514		0.996	0.013	0.523243	0.99419	0.991157	0.984811
0.996	0.011	0.522378	0.995067	0.992498	0.986063		0.996	0.013	0.523315	0.99419	0.991157	0.984811
0.997	0.011	0.522217	0.995023	0.992426	0.986842		0.996	0.013	0.523228	0.99419	0.991157	0.984852
0.997	0.01	0.522511	0.994909	0.992252	0.986669		0.996	0.013	0.523205	0.99419	0.991157	0.984852
0.996	0.01	0.522214	0.995111	0.992562	0.986724		0.996	0.013	0.523221	0.99419	0.991156	0.984975
0.996	0.01	0.522521	0.995155	0.992627	0.987056		0.996	0.013	0.523093	0.99419	0.991156	0.985017
0.997	0.011	0.522445	0.995199	0.992693	0.987265		0.996	0.013	0.523095	0.99419	0.991156	0.985017
0.997	0.011	0.522411	0.994848	0.992162	0.985884		0.996	0.013	0.523194	0.99419	0.991156	0.985058
0.996	0.009	0.522276	0.994971	0.992348	0.986385		0.996	0.013	0.523111	0.99419	0.991156	0.985058
0.996	0.011	0.522413	0.995085	0.992521	0.986722		0.996	0.013	0.523257	0.994181	0.991145	0.984647
0.997	0.011	0.522385	0.995199	0.992693	0.987265		0.996	0.013	0.52319	0.994181	0.991145	0.984647
0.996	0.01	0.522413	0.99512	0.992574	0.986848		0.996	0.013	0.523142	0.994181	0.991145	0.984688
0.997	0.01	0.52227	0.994892	0.992226	0.986545		0.996	0.013	0.523169	0.994181	0.991144	0.984729
0.997	0.011	0.522481	0.995366	0.992948	0.987563		0.996	0.013	0.523176	0.994181	0.991144	0.984729
0.996	0.011	0.522427	0.99483	0.99213	0.986747		0.996	0.013	0.52317	0.994181	0.991144	0.984852
0.997	0.01	0.522443	0.995111	0.992561	0.986806		0.996	0.013	0.52317	0.994181	0.991144	0.984852
0.997	0.011	0.522363	0.994944	0.992305	0.986754		0.996	0.013	0.523192	0.994181	0.991144	0.984852
0.997	0.011	0.522123	0.9949	0.992245	0.985641		0.996	0.013	0.523128	0.994181	0.991144	0.984852
0.997	0.011	0.52243	0.995032	0.992442	0.986431		0.996	0.013	0.523224	0.994181	0.991144	0.984852
0.99659	0.01059	0.522398	0.995045	0.99246	0.986648		0.996	0.013	0.523184	0.994225	0.991211	0.984963
0.000491833	0.000567362	0.000133866	0.000131037	0.000199686	0.000439042		1.22125e-15	1.38778e-17	5.19127e-05	3.54345e-05	5.38644e-05	0.000153986

## Sheet: SPIO
TPR	FPR	fitness	acc	F1	precision	左RF右DT	TPR	FPR	fitness	acc	F1	precision
0.998	0.007	0.600311	0.996673	0.994934	0.991651		0.997	0.009	0.601121	0.995796	0.9936	0.988993
0.998	0.007	0.600235	0.996612	0.994844	0.99065		0.997	0.009	0.601203	0.995805	0.993615	0.988828
0.998	0.007	0.600303	0.996709	0.994992	0.990696		0.997	0.009	0.60112	0.995866	0.993707	0.989162
0.998	0.008	0.600666	0.996559	0.994761	0.99123		0.997	0.009	0.601282	0.995778	0.993575	0.988744
0.998	0.008	0.600508	0.996586	0.994802	0.991147		0.997	0.009	0.601134	0.995664	0.9934	0.988655
0.998	0.008	0.600392	0.996709	0.994988	0.991569		0.997	0.01	0.601182	0.995822	0.993641	0.988953
0.998	0.007	0.600517	0.996603	0.994828	0.991231		0.997	0.009	0.601202	0.995866	0.993708	0.989038
0.998	0.008	0.600511	0.99684	0.99519	0.991616		0.997	0.01	0.60124	0.995848	0.993681	0.988996
0.998	0.008	0.600388	0.996542	0.994737	0.990522		0.997	0.01	0.601183	0.995778	0.993574	0.988909
0.998	0.008	0.600348	0.9967	0.994975	0.991569		0.997	0.01	0.601218	0.995787	0.993588	0.988703
0.998	0.009	0.600504	0.996735	0.995029	0.991403		0.997	0.009	0.601192	0.995848	0.993681	0.989037
0.998	0.007	0.600423	0.99648	0.994642	0.99081		0.997	0.009	0.601053	0.995717	0.993479	0.98903
0.998	0.007	0.600467	0.996349	0.994442	0.990223		0.997	0.009	0.60128	0.995761	0.993546	0.989157
0.998	0.007	0.60047	0.996805	0.995135	0.991906		0.997	0.009	0.601057	0.995831	0.993654	0.989119
0.998	0.008	0.600789	0.996533	0.994721	0.99127		0.997	0.009	0.601295	0.995778	0.993575	0.988744
0.998	0.007	0.600487	0.996577	0.994787	0.991564		0.997	0.009	0.60108	0.995734	0.993508	0.988658
0.998	0.008	0.600467	0.996594	0.994815	0.991314		0.997	0.01	0.601061	0.995682	0.993426	0.988738
0.998	0.008	0.600372	0.996463	0.994612	0.991475		0.997	0.01	0.601099	0.995848	0.993681	0.988996
0.998	0.007	0.600619	0.996568	0.994774	0.991313		0.997	0.01	0.601109	0.995787	0.993588	0.988703
0.998	0.008	0.60071	0.996709	0.994989	0.991402		0.997	0.009	0.601102	0.995778	0.993575	0.988661
0.998	0.008	0.600485	0.996612	0.994841	0.991482		0.997	0.01	0.601083	0.995752	0.993533	0.988991
0.998	0.007	0.600396	0.99684	0.99519	0.991616		0.997	0.009	0.601187	0.995822	0.993641	0.988953
0.998	0.007	0.600419	0.99677	0.995083	0.991446		0.997	0.009	0.601156	0.995778	0.993574	0.988785
0.998	0.008	0.60062	0.996603	0.994826	0.991731		0.997	0.009	0.601192	0.995848	0.993681	0.988996
0.998	0.007	0.600295	0.996594	0.994814	0.991398		0.997	0.009	0.601199	0.995761	0.993548	0.988619
0.998	0.008	0.600602	0.996568	0.994775	0.991022		0.997	0.009	0.601055	0.995752	0.993535	0.988494
0.998	0.007	0.600359	0.996673	0.994934	0.991734		0.997	0.01	0.601216	0.995743	0.993521	0.9887
0.998	0.008	0.600501	0.996498	0.994667	0.991269		0.997	0.009	0.6011	0.995822	0.993641	0.988994
0.998	0.007	0.600475	0.996559	0.994764	0.990606		0.997	0.009	0.601173	0.995919	0.993787	0.989414
0.998	0.008	0.600328	0.996542	0.994735	0.991104		0.997	0.01	0.601243	0.995752	0.993534	0.988866
0.998	0.008	0.600505	0.996559	0.994762	0.990938		0.997	0.009	0.601334	0.995848	0.993681	0.988996
0.998	0.007	0.600355	0.996638	0.99488	0.991733		0.997	0.009	0.60124	0.995892	0.993747	0.989246
0.998	0.008	0.600481	0.996647	0.994896	0.991108		0.997	0.009	0.601071	0.995752	0.993534	0.988701
0.998	0.008	0.600246	0.996656	0.994908	0.991442		0.997	0.009	0.6011	0.995743	0.993522	0.988535
0.998	0.008	0.600572	0.996542	0.994735	0.990938		0.997	0.009	0.60118	0.995884	0.993734	0.989246
0.998	0.007	0.600448	0.996603	0.994829	0.99094		0.997	0.009	0.60127	0.995717	0.993479	0.989113
0.998	0.008	0.600403	0.996823	0.995162	0.991907		0.997	0.01	0.601144	0.995822	0.993642	0.988746
0.998	0.008	0.600535	0.996761	0.995069	0.991654		0.997	0.009	0.601304	0.995743	0.993519	0.989031
0.998	0.008	0.600191	0.996735	0.995027	0.991945		0.997	0.009	0.601279	0.995752	0.993534	0.988825
0.998	0.008	0.600481	0.996621	0.994857	0.990858		0.997	0.009	0.601123	0.995848	0.993681	0.988954
0.998	0.008	0.600228	0.996761	0.99507	0.991321		0.997	0.009	0.601124	0.995743	0.993521	0.9887
0.998	0.007	0.600277	0.996717	0.995002	0.991403		0.997	0.009	0.601343	0.995734	0.993508	0.988493
0.998	0.008	0.600657	0.996551	0.994748	0.991188		0.997	0.01	0.601058	0.995787	0.993588	0.988744
0.998	0.008	0.600545	0.996586	0.994802	0.991189		0.997	0.009	0.60122	0.995752	0.993534	0.988825
0.998	0.008	0.600514	0.996542	0.994736	0.990688		0.997	0.01	0.601138	0.995778	0.993575	0.98862
0.998	0.008	0.600494	0.996586	0.994803	0.990773		0.997	0.009	0.601093	0.995752	0.993533	0.988949
0.998	0.007	0.600279	0.996621	0.994853	0.991732		0.997	0.009	0.601215	0.995866	0.993708	0.989038
0.998	0.007	0.600495	0.996717	0.995002	0.991569		0.997	0.009	0.601216	0.995796	0.9936	0.989034
0.998	0.008	0.600564	0.996735	0.99503	0.991195		0.997	0.009	0.601147	0.995805	0.993615	0.988704
0.998	0.007	0.600498	0.996691	0.994962	0.99136		0.997	0.009	0.6011	0.995822	0.993641	0.988953
0.998	0.007	0.600331	0.996463	0.994614	0.991059		0.997	0.009	0.601288	0.995761	0.993549	0.988495
0.998	0.007	0.60041	0.996524	0.994708	0.991145		0.997	0.009	0.601102	0.995734	0.993507	0.988865
0.998	0.008	0.600502	0.99677	0.995083	0.99153		0.997	0.01	0.601116	0.995761	0.993548	0.988701
0.998	0.007	0.600688	0.996761	0.99507	0.991238		0.997	0.009	0.601035	0.995805	0.993615	0.988745
0.998	0.008	0.600306	0.996472	0.994627	0.991143		0.997	0.009	0.601083	0.995769	0.993561	0.988826
0.998	0.008	0.600493	0.996559	0.99476	0.991438		0.997	0.009	0.601123	0.995682	0.993426	0.988904
0.998	0.007	0.600301	0.996603	0.99483	0.990899		0.997	0.009	0.601111	0.995848	0.99368	0.98912
0.998	0.007	0.600363	0.996568	0.994777	0.990606		0.997	0.009	0.601261	0.995752	0.993533	0.988991
0.998	0.008	0.600483	0.996673	0.994934	0.991818		0.997	0.009	0.601304	0.995813	0.993628	0.988911
0.998	0.008	0.600453	0.996594	0.994814	0.991439		0.997	0.009	0.601073	0.995699	0.993454	0.988615
0.998	0.008	0.600362	0.996603	0.994828	0.991356		0.997	0.009	0.601125	0.995857	0.993694	0.989038
0.998	0.007	0.600416	0.996638	0.99488	0.991649		0.997	0.009	0.601314	0.99591	0.993774	0.989247
0.998	0.008	0.600397	0.996603	0.994827	0.991481		0.997	0.009	0.601168	0.995664	0.9934	0.988613
0.998	0.008	0.60041	0.996665	0.994922	0.9914		0.997	0.009	0.601121	0.995831	0.993655	0.988871
0.998	0.007	0.600406	0.996691	0.994963	0.991277		0.997	0.009	0.601048	0.995813	0.993626	0.989325
0.998	0.008	0.60055	0.996401	0.994521	0.990848		0.997	0.009	0.601054	0.995831	0.993655	0.988829
0.998	0.008	0.600611	0.996594	0.994815	0.991148		0.997	0.009	0.6012	0.995778	0.993575	0.988702
0.998	0.007	0.60034	0.996463	0.994615	0.990809		0.997	0.009	0.601076	0.995796	0.9936	0.988993
0.998	0.007	0.600678	0.996717	0.995002	0.991403		0.997	0.009	0.601172	0.995787	0.993587	0.988868
0.998	0.008	0.600619	0.996682	0.994949	0.991443		0.997	0.01	0.601128	0.995831	0.993654	0.988995
0.998	0.008	0.600627	0.996638	0.994883	0.991025		0.997	0.009	0.601241	0.995822	0.993641	0.988994
0.998	0.008	0.600548	0.996665	0.994922	0.9914		0.997	0.01	0.601249	0.995813	0.993626	0.989325
0.998	0.007	0.600436	0.996638	0.994882	0.991358		0.997	0.009	0.601125	0.995901	0.993761	0.989164
0.998	0.007	0.600476	0.996507	0.99468	0.991352		0.997	0.009	0.601133	0.995717	0.993479	0.98903
0.998	0.009	0.600458	0.996788	0.995108	0.992031		0.997	0.009	0.601128	0.995752	0.993533	0.988949
0.998	0.007	0.600415	0.996568	0.994776	0.990814		0.997	0.009	0.601002	0.995717	0.99348	0.988906
0.998	0.007	0.600117	0.996586	0.994802	0.991147		0.997	0.01	0.601319	0.995857	0.993694	0.989079
0.997	0.008	0.600653	0.996682	0.994946	0.991985		0.997	0.01	0.601145	0.995805	0.993613	0.989076
0.998	0.007	0.600445	0.996612	0.994843	0.990982		0.997	0.009	0.601102	0.995647	0.993372	0.988778
0.998	0.007	0.600505	0.996515	0.994696	0.990729		0.997	0.009	0.601119	0.995752	0.993534	0.988825
0.998	0.007	0.600636	0.996673	0.994935	0.991484		0.997	0.009	0.601099	0.995699	0.993454	0.988657
0.998	0.008	0.600528	0.996603	0.994828	0.991231		0.997	0.01	0.601176	0.995813	0.993627	0.988952
0.998	0.007	0.600488	0.99663	0.99487	0.9909		0.997	0.01	0.601096	0.995822	0.993642	0.988746
0.998	0.008	0.600579	0.996726	0.995015	0.991611		0.997	0.01	0.601188	0.995673	0.993414	0.988614
0.998	0.008	0.600437	0.996682	0.994949	0.991443		0.997	0.009	0.601282	0.995805	0.993615	0.988786
0.998	0.008	0.600472	0.996621	0.994855	0.991232		0.997	0.009	0.601064	0.995743	0.993519	0.989073
0.998	0.007	0.600608	0.996691	0.994963	0.991235		0.997	0.01	0.601185	0.995717	0.99348	0.988864
0.998	0.008	0.600633	0.996735	0.995029	0.99157		0.997	0.01	0.601152	0.995778	0.993574	0.988826
0.998	0.007	0.600537	0.996436	0.994575	0.990808		0.997	0.009	0.601231	0.995822	0.993641	0.988911
0.998	0.007	0.600362	0.996744	0.995043	0.991362		0.997	0.009	0.601105	0.995892	0.993747	0.989371
0.998	0.007	0.600428	0.9967	0.994976	0.991235		0.997	0.01	0.601197	0.995778	0.993572	0.989282
0.998	0.008	0.600535	0.996586	0.994802	0.990981		0.997	0.009	0.601157	0.995822	0.993642	0.988746
0.998	0.008	0.600592	0.996463	0.994615	0.990768		0.997	0.01	0.601144	0.995708	0.993467	0.98874
0.998	0.008	0.600267	0.996594	0.994815	0.991314		0.997	0.009	0.601189	0.995813	0.993628	0.988787
0.998	0.007	0.600458	0.996419	0.994545	0.991515		0.997	0.009	0.601031	0.995822	0.993641	0.988911
0.998	0.008	0.600424	0.996524	0.994707	0.99127		0.997	0.01	0.601087	0.995813	0.993627	0.989077
0.998	0.008	0.600282	0.996533	0.99472	0.99152		0.997	0.009	0.601048	0.995857	0.993694	0.989038
0.998	0.007	0.600503	0.996551	0.994747	0.991271		0.997	0.009	0.60117	0.995761	0.993547	0.988825
0.998	0.008	0.600247	0.996586	0.9948	0.991606		0.997	0.009	0.601275	0.995769	0.993561	0.988826
0.998	0.008	0.600386	0.996524	0.994709	0.990812		0.997	0.009	0.601185	0.995778	0.993575	0.988744
0.99799	0.00758586	0.60046	0.996621	0.994855	0.991274		0.997	0.00926263	0.60116	0.995788	0.993588	0.988898
9.99949e-05	0.000532008	0.000125263	9.93335e-05	0.000151373	0.000351633		0	0.000440061	7.91441e-05	5.76739e-05	8.7894e-05	0.000201308

## Sheet: AdaBoost + EFS
TPR	FPR	fitness	acc	F1	precision	左RF右DT	TPR	FPR	fitness	acc	F1	precision
0.998	0.006	0.596368	0.997139	0.995642	0.993004		0.998	0.005	0.595932	0.997174	0.9957	0.991712
0.998	0.006	0.596118	0.99684	0.995188	0.992033		0.998	0.005	0.596004	0.997165	0.995687	0.991546
0.998	0.006	0.596041	0.996937	0.995335	0.992287		0.998	0.005	0.59597	0.997086	0.995566	0.991459
0.998	0.007	0.596421	0.99706	0.995524	0.991958		0.998	0.005	0.596046	0.997183	0.995714	0.991588
0.998	0.007	0.596339	0.997209	0.995751	0.992463		0.998	0.005	0.596017	0.997121	0.99562	0.991627
0.998	0.006	0.596375	0.996981	0.995403	0.992038		0.998	0.006	0.596017	0.997288	0.995874	0.991842
0.998	0.007	0.596378	0.997499	0.996192	0.993266		0.998	0.005	0.59604	0.997077	0.995553	0.991334
0.998	0.006	0.596169	0.997121	0.995616	0.992752		0.998	0.005	0.595999	0.997209	0.995753	0.991755
0.998	0.008	0.59593	0.997077	0.995551	0.992042		0.998	0.005	0.59603	0.997121	0.99562	0.991627
0.998	0.008	0.596389	0.997279	0.995859	0.992299		0.998	0.005	0.595908	0.997218	0.995767	0.991797
0.998	0.005	0.595996	0.997139	0.995643	0.992586		0.998	0.005	0.595931	0.997156	0.995674	0.991545
0.998	0.006	0.596293	0.996867	0.995229	0.99195		0.998	0.006	0.596005	0.997165	0.995686	0.991795
0.998	0.007	0.596149	0.997358	0.995979	0.992427		0.998	0.005	0.595953	0.997174	0.9957	0.991629
0.998	0.007	0.596409	0.996989	0.995417	0.991872		0.998	0.005	0.596009	0.997235	0.995794	0.991756
0.998	0.006	0.596072	0.997218	0.995762	0.993215		0.998	0.006	0.596002	0.997191	0.995726	0.991963
0.998	0.006	0.59635	0.9972	0.995737	0.992672		0.998	0.005	0.596068	0.997235	0.995794	0.991756
0.998	0.007	0.595999	0.997025	0.995471	0.99179		0.998	0.005	0.595958	0.997156	0.995673	0.991587
0.998	0.006	0.596287	0.997376	0.996005	0.99297		0.998	0.006	0.596001	0.997086	0.995566	0.991543
0.998	0.006	0.596301	0.997455	0.996127	0.992597		0.998	0.005	0.596025	0.997147	0.99566	0.991587
0.998	0.005	0.596347	0.997077	0.99555	0.992459		0.998	0.005	0.595988	0.997147	0.99566	0.991504
0.998	0.006	0.596376	0.99691	0.995297	0.991785		0.998	0.005	0.595982	0.9972	0.99574	0.991714
0.998	0.005	0.596069	0.996972	0.995389	0.992371		0.998	0.006	0.596017	0.997147	0.99566	0.99167
0.998	0.006	0.595953	0.997191	0.995723	0.992838		0.998	0.005	0.595992	0.997147	0.995661	0.99142
0.998	0.006	0.595999	0.996814	0.99515	0.991532		0.998	0.005	0.595979	0.997112	0.995606	0.991585
0.998	0.006	0.596122	0.997253	0.995818	0.992632		0.998	0.005	0.59604	0.99713	0.995633	0.991544
0.998	0.006	0.596568	0.997025	0.995472	0.991665		0.998	0.006	0.596036	0.997226	0.99578	0.991756
0.998	0.006	0.596048	0.997288	0.995871	0.992675		0.998	0.005	0.595935	0.997226	0.99578	0.991798
0.998	0.007	0.596483	0.997542	0.996261	0.992559		0.998	0.006	0.595941	0.99713	0.995634	0.991461
0.998	0.006	0.596377	0.996937	0.995336	0.992078		0.998	0.005	0.595986	0.997165	0.995686	0.991795
0.998	0.007	0.596289	0.997086	0.995562	0.992751		0.998	0.005	0.595995	0.997174	0.9957	0.991546
0.998	0.006	0.596153	0.996928	0.995322	0.992161		0.998	0.005	0.595939	0.99713	0.995633	0.991586
0.998	0.006	0.596265	0.996963	0.995377	0.991787		0.998	0.006	0.596036	0.997139	0.995646	0.991753
0.998	0.006	0.596217	0.997112	0.995604	0.992293		0.998	0.005	0.595999	0.997218	0.995767	0.991714
0.998	0.006	0.595767	0.997165	0.995684	0.992337		0.998	0.005	0.595934	0.997051	0.995513	0.991333
0.998	0.006	0.596486	0.997121	0.995618	0.992168		0.998	0.005	0.595929	0.997086	0.995566	0.991501
0.998	0.007	0.595965	0.997112	0.995605	0.991918		0.998	0.005	0.596024	0.99713	0.995633	0.991503
0.998	0.006	0.596033	0.997384	0.996018	0.992929		0.998	0.005	0.595944	0.997183	0.995714	0.99163
0.998	0.007	0.596053	0.997016	0.995457	0.992081		0.998	0.005	0.595931	0.997174	0.9957	0.991588
0.998	0.006	0.596543	0.997235	0.995791	0.992631		0.998	0.005	0.596075	0.997095	0.995579	0.991626
0.998	0.006	0.596274	0.997244	0.995806	0.992048		0.998	0.005	0.596072	0.997139	0.995646	0.991836
0.998	0.006	0.596055	0.997297	0.995886	0.9923		0.998	0.005	0.596055	0.997156	0.995673	0.991837
0.998	0.006	0.596008	0.997121	0.995616	0.992752		0.998	0.005	0.595952	0.997051	0.995513	0.9915
0.998	0.006	0.596671	0.997191	0.995724	0.992421		0.998	0.005	0.595951	0.99713	0.995633	0.991711
0.998	0.006	0.596004	0.997393	0.996033	0.992553		0.998	0.005	0.5959	0.997191	0.995727	0.991672
0.998	0.007	0.596366	0.99727	0.995844	0.992716		0.998	0.006	0.596017	0.997235	0.995794	0.991798
0.998	0.007	0.596633	0.997016	0.995455	0.992498		0.998	0.005	0.596054	0.997165	0.995687	0.991587
0.998	0.007	0.5961	0.997218	0.995763	0.992881		0.998	0.005	0.596075	0.996998	0.995432	0.991414
0.998	0.007	0.596109	0.997165	0.995684	0.992545		0.998	0.005	0.596052	0.997226	0.995781	0.991631
0.998	0.007	0.596141	0.997358	0.99598	0.992385		0.998	0.005	0.595952	0.9972	0.995741	0.991547
0.998	0.006	0.596264	0.997376	0.996005	0.993012		0.998	0.006	0.596011	0.997209	0.995753	0.991797
0.998	0.007	0.59599	0.997279	0.995858	0.992633		0.998	0.005	0.595993	0.997244	0.995806	0.992131
0.998	0.006	0.596484	0.997235	0.995791	0.992464		0.998	0.005	0.5959	0.997183	0.995713	0.991754
0.998	0.006	0.595905	0.996981	0.995404	0.991955		0.998	0.005	0.595923	0.997112	0.995606	0.991752
0.998	0.006	0.596343	0.99713	0.995634	0.991461		0.998	0.005	0.595992	0.997147	0.99566	0.991587
0.998	0.007	0.59627	0.997121	0.995616	0.992627		0.998	0.005	0.596009	0.997121	0.99562	0.991627
0.998	0.007	0.596054	0.997218	0.995764	0.992589		0.998	0.006	0.595973	0.997139	0.995647	0.991545
0.998	0.007	0.596299	0.9972	0.995736	0.993006		0.998	0.006	0.595989	0.997147	0.995659	0.991795
0.998	0.006	0.595985	0.996823	0.995161	0.992199		0.998	0.006	0.59603	0.997095	0.995579	0.991709
0.998	0.006	0.596609	0.997314	0.99591	0.993093		0.998	0.005	0.596011	0.997104	0.995593	0.991502
0.998	0.007	0.596158	0.996788	0.995109	0.99178		0.998	0.005	0.595907	0.997007	0.995446	0.99129
0.998	0.006	0.596023	0.997077	0.995549	0.992626		0.998	0.005	0.595926	0.997253	0.99582	0.99184
0.998	0.007	0.596179	0.996875	0.995241	0.992242		0.998	0.005	0.59596	0.997174	0.9957	0.991796
0.998	0.006	0.596149	0.997033	0.995482	0.992499		0.998	0.005	0.59596	0.99706	0.995527	0.991251
0.998	0.007	0.596311	0.996752	0.995057	0.991196		0.998	0.005	0.596068	0.997121	0.99562	0.991627
0.998	0.007	0.59607	0.997297	0.995885	0.992717		0.998	0.005	0.595967	0.997191	0.995727	0.99163
0.998	0.008	0.596301	0.996779	0.995096	0.991613		0.998	0.005	0.595939	0.997314	0.995913	0.992092
0.998	0.006	0.59608	0.99713	0.99563	0.992586		0.998	0.005	0.595957	0.997183	0.995713	0.991754
0.998	0.007	0.596137	0.996796	0.995122	0.991906		0.998	0.006	0.595935	0.997165	0.995687	0.991546
0.998	0.006	0.595941	0.997367	0.995991	0.99297		0.998	0.005	0.595969	0.997174	0.995701	0.991505
0.998	0.007	0.596338	0.997244	0.995804	0.992631		0.998	0.005	0.595983	0.997068	0.995539	0.9915
0.998	0.007	0.596127	0.997551	0.996274	0.992726		0.998	0.006	0.595973	0.997174	0.9957	0.991754
0.998	0.007	0.596423	0.996709	0.994988	0.991611		0.998	0.005	0.59591	0.997156	0.995673	0.991587
0.998	0.007	0.59631	0.996998	0.995431	0.991872		0.998	0.005	0.59598	0.997121	0.99562	0.991544
0.998	0.007	0.596504	0.997376	0.996005	0.992845		0.998	0.005	0.596063	0.997112	0.995606	0.991544
0.998	0.005	0.596201	0.99727	0.995845	0.992507		0.998	0.006	0.596071	0.99706	0.995526	0.991583
0.998	0.007	0.596467	0.997305	0.995898	0.992801		0.998	0.005	0.596073	0.997156	0.995673	0.991837
0.998	0.006	0.596311	0.997174	0.995699	0.992004		0.998	0.005	0.595935	0.997112	0.995607	0.991461
0.998	0.006	0.596252	0.997341	0.995951	0.992802		0.998	0.005	0.595963	0.99727	0.995846	0.992132
0.998	0.005	0.596121	0.997033	0.995483	0.99229		0.998	0.005	0.595947	0.997077	0.995553	0.991376
0.998	0.005	0.596116	0.996963	0.995376	0.992246		0.998	0.006	0.596002	0.997165	0.995686	0.991754
0.998	0.006	0.596408	0.99706	0.995523	0.992458		0.998	0.005	0.59599	0.997209	0.995754	0.991714
0.998	0.007	0.595999	0.996972	0.995389	0.992246		0.998	0.005	0.59602	0.997051	0.995514	0.991043
0.998	0.005	0.596514	0.997226	0.995776	0.992965		0.998	0.005	0.596005	0.997218	0.995767	0.991756
0.998	0.006	0.596108	0.997235	0.99579	0.993007		0.998	0.005	0.596027	0.997209	0.995753	0.991797
0.998	0.006	0.596497	0.99727	0.995844	0.992841		0.998	0.005	0.595995	0.9972	0.99574	0.991838
0.998	0.006	0.596036	0.997297	0.995883	0.993302		0.998	0.005	0.596063	0.997174	0.995699	0.991879
0.998	0.007	0.596231	0.997402	0.996045	0.993054		0.998	0.005	0.596084	0.997209	0.995753	0.991922
0.998	0.007	0.596234	0.997104	0.99559	0.99246		0.998	0.006	0.59592	0.99713	0.995633	0.991628
0.998	0.006	0.595755	0.997139	0.995644	0.992419		0.998	0.005	0.595992	0.997183	0.995713	0.991754
0.998	0.007	0.596257	0.997104	0.99559	0.992334		0.998	0.005	0.595919	0.997174	0.995701	0.99138
0.998	0.006	0.596634	0.996884	0.995256	0.991784		0.998	0.005	0.596067	0.997121	0.995619	0.991669
0.998	0.006	0.596531	0.996902	0.995284	0.991535		0.998	0.005	0.59593	0.997183	0.995714	0.99163
0.998	0.006	0.596747	0.997156	0.99567	0.992712		0.998	0.005	0.595979	0.997068	0.99554	0.99121
0.998	0.006	0.596385	0.997174	0.995697	0.992504		0.998	0.005	0.595939	0.997139	0.995646	0.991669
0.998	0.007	0.59636	0.997139	0.995644	0.992336		0.998	0.006	0.595929	0.997077	0.995553	0.991584
0.998	0.006	0.596098	0.997604	0.996353	0.993228		0.998	0.005	0.596043	0.997191	0.995726	0.991963
0.998	0.006	0.596359	0.997042	0.995498	0.991915		0.998	0.006	0.595983	0.997209	0.995752	0.992047
0.998	0.007	0.596084	0.997077	0.995548	0.992918		0.998	0.006	0.596026	0.997156	0.995674	0.991421
0.998	0.007	0.596352	0.997147	0.995656	0.99267		0.998	0.005	0.595944	0.997174	0.9957	0.991629
0.998	0.007	0.596586	0.997191	0.995725	0.992254		0.998	0.005	0.595969	0.997156	0.995673	0.991753
0.998	0.00637	0.596238	0.997138	0.995643	0.992414		0.998	0.00521	0.595988	0.997155	0.995672	0.991649
9.99201e-16	0.000658103	0.000204395	0.000186175	0.000283802	0.000448182		9.99201e-16	0.000407308	4.81806e-05	5.75758e-05	8.76081e-05	0.000186918

## Sheet: IG
TPR	FPR	fitness	acc	F1	precision	左RF右DT	TPR	FPR	fitness	acc	F1	precision
0.997758	0.005	0.584613	0.997534	0.996244	0.99337		0.997278	0.004	0.584108	0.996945	0.994895	0.99253
0.997441	0.006	0.584356	0.997771	0.996604	0.99337		0.996961	0.004	0.584111	0.996888	0.994863	0.99253
0.997834	0.006	0.584472	0.99792	0.996833	0.993371		0.997354	0.003	0.584102	0.996958	0.994902	0.992531
0.998	0.005	0.584294	0.997806	0.996658	0.993371		0.997792	0.004	0.584002	0.997037	0.994946	0.992531
0.997393	0.005	0.584296	0.997534	0.996242	0.99337		0.996913	0.004	0.584101	0.996879	0.994858	0.99253
0.997393	0.006	0.584383	0.997841	0.996713	0.99337		0.996913	0.004	0.584117	0.996879	0.994858	0.99253
0.998	0.005	0.584428	0.997823	0.996686	0.993371		0.99782	0.004	0.58412	0.997042	0.994949	0.992531
0.997894	0.006	0.584145	0.997578	0.99631	0.993371		0.997414	0.004	0.58394	0.996969	0.994908	0.992531
0.997275	0.006	0.584439	0.997981	0.996926	0.99337		0.996795	0.004	0.584036	0.996858	0.994847	0.99253
0.997781	0.005	0.584525	0.997534	0.996244	0.99337		0.997301	0.003	0.584049	0.996949	0.994897	0.99253
0.997278	0.004	0.584659	0.997929	0.996847	0.99337		0.996798	0.004	0.583999	0.996858	0.994847	0.99253
0.997277	0.005	0.584478	0.997402	0.996043	0.99337		0.996797	0.004	0.584083	0.996858	0.994847	0.99253
0.997631	0.005	0.584585	0.997586	0.996324	0.99337		0.997151	0.003	0.5841	0.996922	0.994882	0.99253
0.997	0.004	0.584611	0.997481	0.996162	0.993368		0.996073	0.004	0.584051	0.996728	0.994774	0.992528
0.997	0.005	0.584436	0.997911	0.99682	0.993368		0.996168	0.004	0.584055	0.996745	0.994784	0.992528
0.997229	0.006	0.584294	0.997692	0.996485	0.993369		0.996749	0.004	0.584114	0.996849	0.994842	0.992529
0.997004	0.005	0.58442	0.997885	0.996778	0.993369		0.996524	0.004	0.584157	0.996809	0.994819	0.992529
0.997667	0.005	0.584533	0.99749	0.996177	0.99337		0.997187	0.004	0.584117	0.996928	0.994886	0.99253
0.997056	0.006	0.584472	0.997955	0.996886	0.993369		0.996576	0.004	0.584064	0.996818	0.994825	0.992529
0.997	0.005	0.584391	0.997902	0.996805	0.993369		0.996324	0.004	0.584028	0.996773	0.994799	0.992529
0.998	0.006	0.584825	0.997516	0.996217	0.993371		0.997763	0.003	0.584048	0.997032	0.994943	0.992531
0.997397	0.005	0.584224	0.997762	0.996592	0.99337		0.996917	0.004	0.584006	0.99688	0.994859	0.99253
0.997544	0.004	0.584565	0.997621	0.996378	0.99337		0.997064	0.004	0.584102	0.996906	0.994873	0.99253
0.997	0.005	0.584332	0.997604	0.996351	0.993369		0.996318	0.004	0.58414	0.996772	0.994799	0.992529
0.997238	0.005	0.584337	0.997788	0.996632	0.99337		0.996758	0.004	0.584023	0.996851	0.994843	0.99253
0.997565	0.006	0.584761	0.9977	0.996498	0.99337		0.997085	0.004	0.584067	0.99691	0.994876	0.99253
0.997	0.005	0.584263	0.997727	0.996539	0.993369		0.996455	0.004	0.584031	0.996796	0.994812	0.992529
0.997698	0.005	0.584415	0.997999	0.996952	0.99337		0.997218	0.004	0.584039	0.996934	0.994889	0.99253
0.99721	0.005	0.584639	0.998008	0.996966	0.993369		0.99673	0.004	0.584096	0.996846	0.99484	0.992529
0.997364	0.006	0.584252	0.997823	0.996684	0.99337		0.996884	0.004	0.584142	0.996874	0.994855	0.99253
0.997209	0.005	0.584639	0.997797	0.996645	0.993369		0.996729	0.004	0.584099	0.996846	0.99484	0.992529
0.998	0.006	0.584835	0.997858	0.996739	0.993372		0.997956	0.004	0.584064	0.997067	0.994963	0.992532
0.997503	0.005	0.584087	0.997709	0.996511	0.99337		0.997023	0.004	0.584086	0.996899	0.994869	0.99253
0.997	0.005	0.584457	0.997937	0.996859	0.993369		0.996501	0.004	0.584015	0.996805	0.994817	0.992529
0.997921	0.005	0.584363	0.997937	0.996859	0.993371		0.997441	0.004	0.584096	0.996974	0.994911	0.992531
0.997	0.005	0.5844	0.997876	0.996766	0.993369		0.99642	0.004	0.584098	0.99679	0.994809	0.992529
0.997614	0.004	0.584445	0.997727	0.996537	0.99337		0.997134	0.004	0.584101	0.996919	0.99488	0.99253
0.997	0.004	0.584102	0.997937	0.996859	0.993368		0.99605	0.004	0.584127	0.996724	0.994772	0.992528
0.997	0.005	0.584098	0.997604	0.996351	0.993369		0.996366	0.004	0.584017	0.99678	0.994804	0.992529
0.997608	0.005	0.584513	0.997648	0.996417	0.99337		0.997128	0.004	0.584049	0.996918	0.99488	0.99253
0.997879	0.005	0.584351	0.997885	0.996778	0.993371		0.997399	0.004	0.584081	0.996966	0.994907	0.992531
0.997596	0.005	0.584528	0.99785	0.996725	0.99337		0.997116	0.004	0.584133	0.996915	0.994879	0.99253
0.997452	0.005	0.584448	0.997656	0.996431	0.99337		0.996972	0.004	0.584083	0.99689	0.994864	0.99253
0.997359	0.005	0.584657	0.9977	0.996496	0.99337		0.996879	0.004	0.584017	0.996873	0.994855	0.99253
0.997	0.005	0.584482	0.997727	0.996538	0.993369		0.996291	0.004	0.584047	0.996767	0.994796	0.992529
0.99715	0.005	0.584668	0.997876	0.996765	0.993369		0.99667	0.004	0.584037	0.996835	0.994834	0.992529
0.99728	0.005	0.584633	0.997771	0.996604	0.99337		0.9968	0.004	0.584177	0.996859	0.994847	0.99253
0.998	0.004	0.584498	0.997709	0.996511	0.993371		0.997559	0.004	0.584006	0.996995	0.994923	0.992531
0.997682	0.005	0.584464	0.998157	0.997193	0.99337		0.997202	0.004	0.58399	0.996931	0.994887	0.99253
0.997	0.005	0.58465	0.997665	0.996446	0.993368		0.996148	0.003	0.58407	0.996741	0.994782	0.992528
0.997672	0.005	0.584392	0.997911	0.996819	0.99337		0.997192	0.004	0.584077	0.996929	0.994886	0.99253
0.997317	0.005	0.584229	0.998025	0.996993	0.99337		0.996837	0.004	0.583983	0.996865	0.994851	0.99253
0.997172	0.005	0.584449	0.997753	0.996576	0.993369		0.996692	0.004	0.584089	0.996839	0.994836	0.992529
0.997816	0.005	0.584174	0.997692	0.996484	0.993371		0.997336	0.004	0.584042	0.996955	0.994901	0.992531
0.998	0.006	0.584629	0.997955	0.996884	0.993371		0.997545	0.004	0.584221	0.996993	0.994922	0.992531
0.997976	0.006	0.584414	0.997709	0.996511	0.993371		0.997496	0.004	0.584129	0.996984	0.994917	0.992531
0.99709	0.005	0.584713	0.997472	0.996149	0.993369		0.99661	0.004	0.584115	0.996824	0.994828	0.992529
0.997355	0.006	0.584215	0.997411	0.996057	0.99337		0.996875	0.004	0.584006	0.996872	0.994855	0.99253
0.997676	0.005	0.584573	0.99785	0.996724	0.99337		0.997196	0.004	0.58406	0.99693	0.994887	0.99253
0.997998	0.006	0.584258	0.997867	0.996753	0.993371		0.997518	0.004	0.5841	0.996988	0.994919	0.992531
0.99727	0.005	0.584529	0.997841	0.996712	0.99337		0.99679	0.004	0.584121	0.996857	0.994846	0.99253
0.997417	0.005	0.584403	0.997683	0.996471	0.99337		0.996937	0.004	0.584043	0.996883	0.994861	0.99253
0.997	0.005	0.584533	0.998016	0.996979	0.993369		0.996477	0.004	0.584068	0.9968	0.994815	0.992529
0.997	0.004	0.584201	0.997639	0.996402	0.993369		0.996432	0.004	0.584043	0.996792	0.99481	0.992529
0.997916	0.006	0.584335	0.997718	0.996525	0.993371		0.997436	0.004	0.584009	0.996973	0.994911	0.992531
0.998	0.005	0.584453	0.997683	0.99647	0.993371		0.997708	0.004	0.584083	0.997022	0.994938	0.992531
0.997474	0.005	0.584748	0.997902	0.996805	0.99337		0.996994	0.004	0.584073	0.996894	0.994866	0.99253
0.998	0.005	0.584478	0.997823	0.996685	0.993371		0.997532	0.004	0.58409	0.99699	0.99492	0.992531
0.997691	0.006	0.584442	0.997841	0.996713	0.99337		0.997211	0.004	0.584031	0.996933	0.994888	0.99253
0.997187	0.005	0.584189	0.997999	0.996952	0.993369		0.996707	0.004	0.583962	0.996842	0.994838	0.992529
0.997691	0.005	0.584452	0.997797	0.996646	0.99337		0.997211	0.004	0.584077	0.996933	0.994888	0.99253
0.998	0.005	0.584601	0.99785	0.996725	0.993371		0.997799	0.004	0.58412	0.997038	0.994947	0.992531
0.997492	0.006	0.5845	0.997867	0.996752	0.99337		0.997012	0.004	0.584071	0.996897	0.994868	0.99253
0.998	0.005	0.584483	0.997762	0.996592	0.993371		0.997812	0.004	0.584086	0.997041	0.994948	0.992531
0.997	0.005	0.584309	0.997735	0.996551	0.993368		0.996	0.004	0.584087	0.996664	0.994739	0.992528
0.997921	0.005	0.584155	0.997753	0.996577	0.993371		0.997441	0.004	0.584027	0.996974	0.994911	0.992531
0.997554	0.005	0.58446	0.997867	0.996753	0.99337		0.997074	0.004	0.584129	0.996908	0.994874	0.99253
0.99736	0.006	0.584605	0.998025	0.996993	0.99337		0.99688	0.004	0.584127	0.996873	0.994855	0.99253
0.997556	0.005	0.584446	0.99763	0.996391	0.99337		0.997076	0.003	0.584096	0.996908	0.994875	0.99253
0.997	0.005	0.584619	0.997656	0.996433	0.993368		0.996036	0.004	0.584056	0.996721	0.994771	0.992528
0.9974	0.005	0.584411	0.997744	0.996564	0.99337		0.99692	0.004	0.584065	0.99688	0.994859	0.99253
0.997689	0.004	0.58434	0.997885	0.99678	0.99337		0.997209	0.004	0.583996	0.996932	0.994888	0.99253
0.998	0.006	0.584667	0.997964	0.996899	0.993371		0.997769	0.004	0.584019	0.997033	0.994944	0.992531
0.997251	0.005	0.584756	0.997393	0.996029	0.99337		0.996771	0.004	0.584115	0.996853	0.994844	0.99253
0.997106	0.005	0.584594	0.997709	0.996511	0.993369		0.996626	0.004	0.584046	0.996827	0.99483	0.992529
0.997259	0.005	0.584196	0.997806	0.996659	0.99337		0.996779	0.004	0.584062	0.996855	0.994845	0.99253
0.997968	0.006	0.584409	0.997534	0.996243	0.993371		0.997488	0.004	0.584015	0.996982	0.994916	0.992531
0.997674	0.005	0.584295	0.99742	0.996069	0.99337		0.997194	0.004	0.584111	0.99693	0.994886	0.99253
0.997245	0.005	0.584352	0.997525	0.996231	0.99337		0.996765	0.004	0.584043	0.996852	0.994844	0.99253
0.997767	0.005	0.584634	0.99799	0.996939	0.99337		0.997287	0.003	0.584074	0.996946	0.994896	0.99253
0.997559	0.005	0.584121	0.997858	0.996738	0.99337		0.997079	0.004	0.584027	0.996909	0.994875	0.99253
0.997994	0.005	0.58446	0.997639	0.996403	0.993371		0.997514	0.004	0.584108	0.996987	0.994918	0.992531
0.997159	0.004	0.584757	0.997911	0.996819	0.993369		0.996679	0.004	0.584158	0.996837	0.994835	0.992529
0.997346	0.005	0.584485	0.997814	0.996672	0.99337		0.996866	0.004	0.583996	0.996871	0.994854	0.99253
0.997314	0.005	0.584364	0.997955	0.996886	0.99337		0.996834	0.004	0.584046	0.996865	0.99485	0.99253
0.997	0.005	0.584251	0.99785	0.996726	0.993369		0.996298	0.003	0.584137	0.996768	0.994797	0.992529
0.997658	0.005	0.584138	0.997727	0.996538	0.99337		0.997178	0.004	0.584117	0.996927	0.994885	0.99253
0.997641	0.005	0.584442	0.997727	0.99654	0.99337		0.997161	0.004	0.584073	0.996923	0.994883	0.99253
0.997513	0.005	0.584482	0.998104	0.997113	0.99337		0.997033	0.004	0.584092	0.9969	0.99487	0.99253
0.997393	0.006	0.584652	0.997735	0.996551	0.99337		0.996913	0.004	0.58409	0.996879	0.994858	0.99253
0.997477	0.00513	0.584446	0.997771	0.996606	0.99337		0.996981	0.00392	0.584072	0.996891	0.994865	0.99253
0.000339078	0.000541387	0.000172658	0.000163809	0.000249753	8.13255e-07		0.00044482	0.000271293	4.84015e-05	8.13255e-05	4.51808e-05	8.13255e-07

## Sheet: WOA
TPR	FPR	fitness	acc	F1	precision	左RF右DT	TPR	FPR	fitness	acc	F1	precision
0.988	0.026	0.628147	0.985667	0.978299	0.957897		0.989	0.028	0.628606	0.985316	0.97776	0.957482
0.989	0.027	0.627826	0.985693	0.978352	0.957177		0.989	0.028	0.628522	0.985298	0.977735	0.957326
0.989	0.026	0.627864	0.985667	0.978315	0.956982		0.989	0.028	0.628535	0.985219	0.977616	0.957081
0.989	0.026	0.628354	0.985693	0.978348	0.957406		0.988	0.028	0.628614	0.985096	0.977432	0.956712
0.989	0.026	0.627705	0.985816	0.978521	0.958462		0.989	0.028	0.628656	0.985114	0.977458	0.956792
0.989	0.026	0.627742	0.985404	0.977919	0.956205		0.989	0.028	0.628592	0.985272	0.977691	0.957473
0.989	0.026	0.628084	0.985588	0.97818	0.957652		0.989	0.028	0.62857	0.985175	0.977551	0.956919
0.989	0.026	0.628035	0.985702	0.978365	0.957217		0.989	0.028	0.628515	0.985368	0.977841	0.957531
0.988	0.026	0.628085	0.98543	0.977949	0.956819		0.989	0.028	0.628543	0.985263	0.977683	0.957204
0.989	0.027	0.628478	0.985869	0.978593	0.959047		0.989	0.028	0.628722	0.985193	0.977575	0.957114
0.989	0.027	0.627992	0.985474	0.97804	0.955575		0.989	0.028	0.628617	0.985307	0.977747	0.957442
0.989	0.027	0.628011	0.986044	0.978849	0.960003		0.989	0.028	0.628613	0.98521	0.977599	0.957308
0.989	0.027	0.628406	0.985851	0.978567	0.958967		0.989	0.028	0.628477	0.985254	0.977663	0.957546
0.989	0.026	0.62784	0.985886	0.978611	0.95955		0.989	0.028	0.628596	0.985263	0.977675	0.957625
0.989	0.026	0.628173	0.985781	0.97847	0.958226		0.989	0.028	0.6285	0.985298	0.977732	0.957479
0.989	0.026	0.628214	0.986027	0.978831	0.959462		0.989	0.028	0.628513	0.985175	0.977549	0.957034
0.989	0.026	0.627904	0.986036	0.978846	0.959387		0.989	0.028	0.62862	0.985123	0.977466	0.957099
0.989	0.026	0.627854	0.985491	0.978038	0.957213		0.989	0.028	0.628647	0.985289	0.97772	0.957401
0.989	0.027	0.628073	0.985851	0.978565	0.959044		0.989	0.028	0.628663	0.985193	0.977574	0.957152
0.989	0.027	0.627978	0.985676	0.978331	0.956831		0.989	0.028	0.628624	0.985272	0.977691	0.957512
0.989	0.027	0.627887	0.985702	0.978346	0.958325		0.989	0.028	0.628606	0.985289	0.977719	0.957439
0.989	0.026	0.628123	0.98557	0.978144	0.958145		0.989	0.028	0.628493	0.985298	0.97773	0.957632
0.989	0.027	0.627937	0.985913	0.978652	0.959555		0.989	0.028	0.628613	0.985254	0.977665	0.957393
0.989	0.027	0.627806	0.985474	0.977999	0.957858		0.989	0.028	0.628488	0.985114	0.97746	0.956678
0.989	0.026	0.627943	0.985658	0.978266	0.959006		0.989	0.028	0.62852	0.985342	0.977794	0.95787
0.989	0.027	0.628004	0.9855	0.978068	0.956263		0.989	0.028	0.628622	0.985316	0.977756	0.957674
0.989	0.025	0.628461	0.985483	0.978023	0.957287		0.989	0.028	0.628586	0.985254	0.97767	0.957164
0.989	0.027	0.628079	0.985763	0.978441	0.958337		0.989	0.028	0.628589	0.985149	0.977512	0.956799
0.989	0.025	0.628043	0.985597	0.978181	0.95838		0.989	0.028	0.628581	0.985158	0.977522	0.956992
0.989	0.028	0.628121	0.985755	0.978439	0.957685		0.989	0.028	0.628539	0.985298	0.977734	0.957402
0.989	0.026	0.627992	0.985711	0.978375	0.957448		0.989	0.028	0.628521	0.985254	0.977669	0.957203
0.989	0.026	0.628056	0.985904	0.978641	0.9594		0.989	0.028	0.628627	0.985298	0.977732	0.957517
0.989	0.027	0.628077	0.985289	0.977754	0.955536		0.989	0.028	0.628649	0.985114	0.97745	0.957212
0.989	0.027	0.627885	0.985483	0.978027	0.957058		0.989	0.028	0.628569	0.985289	0.977717	0.957553
0.989	0.025	0.627832	0.985781	0.978468	0.95834		0.989	0.028	0.62868	0.985263	0.977679	0.957395
0.989	0.026	0.628071	0.98586	0.978599	0.957897		0.989	0.028	0.628669	0.985184	0.977563	0.956997
0.988	0.026	0.628101	0.985658	0.978281	0.958125		0.989	0.028	0.628569	0.985298	0.977734	0.957402
0.989	0.026	0.62814	0.985834	0.978546	0.958619		0.989	0.028	0.628533	0.985228	0.977628	0.957197
0.989	0.027	0.627959	0.985834	0.978538	0.95904		0.989	0.028	0.628562	0.985298	0.977733	0.957441
0.989	0.026	0.627824	0.986036	0.978849	0.959233		0.989	0.028	0.628712	0.985263	0.97768	0.957319
0.989	0.026	0.62814	0.985746	0.978427	0.957569		0.989	0.028	0.628527	0.985167	0.977535	0.957032
0.989	0.026	0.628037	0.985588	0.978193	0.956927		0.989	0.028	0.628588	0.985193	0.977571	0.957343
0.989	0.027	0.628253	0.985851	0.978564	0.959159		0.989	0.028	0.6285	0.985377	0.977852	0.957648
0.988	0.026	0.628151	0.985474	0.978022	0.956562		0.989	0.028	0.628531	0.98521	0.977604	0.957041
0.989	0.026	0.628057	0.985799	0.978506	0.957732		0.989	0.028	0.628598	0.985219	0.977619	0.956966
0.989	0.026	0.628144	0.985737	0.978417	0.957377		0.989	0.028	0.628473	0.985237	0.977644	0.957046
0.988	0.025	0.627822	0.985728	0.978385	0.958406		0.989	0.028	0.62856	0.98521	0.977601	0.957155
0.989	0.027	0.62792	0.985799	0.978487	0.958842		0.989	0.028	0.62858	0.985272	0.977696	0.957244
0.989	0.027	0.628026	0.985711	0.978376	0.95741		0.989	0.028	0.62873	0.98514	0.977496	0.95695
0.989	0.027	0.628184	0.98557	0.978166	0.956924		0.989	0.028	0.628526	0.985228	0.977629	0.957159
0.989	0.026	0.627896	0.985676	0.978322	0.957364		0.989	0.028	0.628628	0.98521	0.977601	0.957194
0.989	0.027	0.627759	0.985623	0.978239	0.95743		0.989	0.028	0.628598	0.985246	0.977653	0.957315
0.989	0.026	0.628133	0.985807	0.978514	0.958078		0.989	0.028	0.628697	0.985219	0.977617	0.957043
0.989	0.027	0.628121	0.985667	0.978293	0.958203		0.989	0.028	0.628624	0.985149	0.977504	0.957257
0.989	0.027	0.627949	0.985781	0.978478	0.957805		0.989	0.028	0.628708	0.98521	0.9776	0.957232
0.989	0.026	0.62812	0.985816	0.978538	0.957507		0.989	0.028	0.628466	0.985088	0.977418	0.95671
0.989	0.027	0.628074	0.985974	0.978756	0.959106		0.989	0.028	0.628572	0.985193	0.977573	0.95719
0.988	0.026	0.628081	0.985562	0.97814	0.957608		0.989	0.028	0.628611	0.985289	0.977721	0.957324
0.989	0.027	0.627857	0.985702	0.97837	0.956951		0.989	0.028	0.62864	0.985237	0.977642	0.957199
0.989	0.026	0.628251	0.9855	0.978034	0.95817		0.989	0.028	0.628708	0.985158	0.977518	0.957221
0.989	0.026	0.628054	0.985851	0.97859	0.957629		0.989	0.028	0.62861	0.985316	0.977756	0.957674
0.989	0.027	0.627857	0.985676	0.978303	0.958434		0.989	0.028	0.628502	0.985281	0.977709	0.957246
0.989	0.027	0.627841	0.985807	0.978505	0.958575		0.989	0.028	0.628613	0.985246	0.977657	0.957124
0.989	0.027	0.627966	0.985816	0.978529	0.958003		0.989	0.028	0.628672	0.985193	0.977578	0.956961
0.989	0.026	0.628046	0.985799	0.978499	0.958153		0.989	0.028	0.62868	0.985281	0.97771	0.957208
0.989	0.027	0.627817	0.985825	0.978522	0.959192		0.989	0.028	0.628697	0.985281	0.977702	0.957666
0.989	0.027	0.627891	0.986018	0.978822	0.959191		0.989	0.028	0.628617	0.985131	0.977477	0.957254
0.989	0.027	0.627743	0.985676	0.978306	0.958281		0.989	0.028	0.62851	0.985219	0.977611	0.957386
0.989	0.026	0.628119	0.985544	0.978113	0.957567		0.989	0.028	0.628609	0.985237	0.97764	0.957275
0.989	0.026	0.627791	0.985755	0.978434	0.957991		0.989	0.028	0.628624	0.985333	0.977783	0.957715
0.989	0.026	0.627987	0.985904	0.978651	0.958824		0.989	0.028	0.628647	0.985325	0.977773	0.957522
0.989	0.027	0.628346	0.98593	0.978684	0.959328		0.989	0.028	0.628637	0.985228	0.977628	0.957197
0.988	0.026	0.628074	0.985439	0.977963	0.956821		0.989	0.028	0.628734	0.985237	0.977639	0.957352
0.989	0.026	0.628166	0.98586	0.978593	0.958241		0.989	0.028	0.628618	0.985175	0.977552	0.956843
0.989	0.025	0.62787	0.985632	0.978238	0.958234		0.989	0.028	0.628634	0.985404	0.977889	0.957882
0.989	0.028	0.628195	0.985649	0.978272	0.957855		0.989	0.028	0.628687	0.985237	0.977637	0.957428
0.989	0.027	0.628201	0.985772	0.97845	0.958645		0.989	0.028	0.628532	0.985061	0.977376	0.956781
0.989	0.026	0.628331	0.985878	0.978608	0.958972		0.989	0.028	0.628576	0.985342	0.977803	0.957373
0.989	0.026	0.628306	0.9855	0.978059	0.956795		0.989	0.028	0.628469	0.985325	0.977772	0.957561
0.989	0.027	0.62792	0.985658	0.978308	0.9566		0.989	0.028	0.628559	0.985193	0.977578	0.956961
0.989	0.026	0.628111	0.985316	0.977783	0.956187		0.989	0.028	0.628605	0.985228	0.97762	0.957618
0.988	0.026	0.627907	0.985711	0.978351	0.958825		0.989	0.028	0.628651	0.985298	0.977732	0.957479
0.989	0.026	0.627997	0.985632	0.978268	0.956556		0.989	0.028	0.628572	0.985298	0.977736	0.957288
0.989	0.026	0.628118	0.986044	0.978857	0.959542		0.989	0.028	0.628531	0.985114	0.977455	0.956945
0.989	0.026	0.627846	0.98579	0.978481	0.958419		0.989	0.028	0.628586	0.985096	0.977426	0.957018
0.989	0.027	0.627992	0.985869	0.978591	0.959124		0.989	0.028	0.628681	0.985246	0.977651	0.95743
0.989	0.026	0.628208	0.985842	0.978571	0.957932		0.989	0.028	0.62856	0.985202	0.977588	0.957154
0.989	0.027	0.62801	0.985553	0.978143	0.956692		0.988	0.028	0.62861	0.985228	0.977625	0.95735
0.989	0.026	0.628062	0.985755	0.978408	0.959448		0.989	0.028	0.628544	0.985272	0.977692	0.957435
0.989	0.026	0.628015	0.985772	0.978464	0.957842		0.989	0.028	0.628666	0.985298	0.977734	0.957402
0.989	0.027	0.627723	0.985834	0.978541	0.958887		0.989	0.028	0.628641	0.985246	0.977657	0.957086
0.989	0.026	0.628031	0.985763	0.97845	0.95784		0.989	0.028	0.628548	0.985237	0.977639	0.957352
0.989	0.027	0.627765	0.985939	0.978694	0.959522		0.989	0.028	0.628638	0.985281	0.977702	0.957666
0.989	0.028	0.627998	0.986053	0.978874	0.959352		0.989	0.028	0.628589	0.985219	0.977614	0.957234
0.989	0.026	0.628221	0.985676	0.97833	0.956907		0.989	0.028	0.62854	0.985219	0.977614	0.957195
0.989	0.027	0.62779	0.985746	0.97842	0.957989		0.989	0.028	0.628536	0.985237	0.97764	0.957275
0.989	0.027	0.628113	0.985649	0.978271	0.957893		0.989	0.028	0.628625	0.985272	0.977695	0.957282
0.989	0.026	0.628215	0.985728	0.978404	0.957337		0.989	0.028	0.628621	0.985246	0.977651	0.95743
0.989	0.027	0.627904	0.985649	0.978249	0.959158		0.989	0.028	0.628599	0.985272	0.977691	0.957512
0.989	0.027	0.627693	0.985658	0.978318	0.95603		0.989	0.028	0.62861	0.985307	0.977745	0.957519
0.98892	0.02642	0.628023	0.985725	0.978388	0.958006		0.98898	0.028	0.628595	0.985238	0.977642	0.957279
0.000271293	0.000635295	0.000169081	0.000163794	0.000241282	0.000990792		0.00014	2.08167e-17	6.35055e-05	6.78503e-05	0.000101935	0.000253627
