# Supplementary material for: Integration of simulated annealing into pigeon inspired optimizer algorithm for feature selection in network intrusion detection systems
Source: PeerJ journal article supplement (doi:10.7717/peerj-cs.2176), 2024-07-16
Supplement: code_and_data.zip [file NSL-KDD.xlsx]

## Sheet: SABPIO
TPR	FPR	fitness	acc	F1	precision	left RF right DT	TPR	FPR	fitness	acc	F1	precision
0.893974	0.082105	0.572401	0.918169	0.908655	0.838161		0.908482	0.089	0.593926	0.910035	0.890303	0.883252
0.887053	0.0820986	0.572083	0.914067	0.903919	0.830541		0.900196	0.089	0.600396	0.905299	0.886081	0.873981
0.89562	0.0821065	0.580519	0.919144	0.909782	0.839972		0.910452	0.089	0.604201	0.911162	0.891307	0.885456
0.905161	0.0821152	0.580813	0.924799	0.916312	0.85		0.921876	0.089	0.595332	0.917692	0.897128	0.888
0.886008	0.0820977	0.580813	0.913447	0.903203	0.82939		0.898944	0.089	0.597037	0.904583	0.885443	0.872581
0.886008	0.0820977	0.572083	0.913447	0.903203	0.82939		0.898945	0.089	0.594892	0.904583	0.885443	0.872582
0.905773	0.0821158	0.580846	0.925162	0.916731	0.85		0.922609	0.089	0.594076	0.918111	0.897502	0.888
0.896925	0.0821077	0.572116	0.919918	0.910675	0.841409		0.912015	0.089	0.600719	0.912055	0.892103	0.887205
0.883443	0.0820953	0.572466	0.911927	0.901448	0.826566		0.895873	0.089	0.592247	0.902828	0.883878	0.869146
0.894474	0.0821054	0.572466	0.918465	0.908997	0.838711		0.90908	0.089	0.603296	0.910377	0.890608	0.883921
0.883509	0.0820954	0.572377	0.911966	0.901493	0.826639		0.895952	0.089	0.597382	0.902873	0.883918	0.869234
0.883484	0.0820953	0.580519	0.911951	0.901476	0.826611		0.895922	0.089	0.591445	0.902856	0.883903	0.8692
0.891197	0.0821024	0.572083	0.916523	0.906755	0.835104		0.905158	0.089	0.582986	0.908135	0.888609	0.879533
0.88	0.0820809	0.580813	0.9026	0.890677	0.825		0.88	0.089	0.595312	0.892057	0.874277	0.86
0.88	0.0820828	0.572059	0.903817	0.892082	0.825		0.88	0.089	0.602643	0.893462	0.875529	0.86
0.882431	0.0820944	0.580494	0.911328	0.900755	0.825453		0.894662	0.089	0.594841	0.902135	0.883261	0.867791
0.88	0.0820899	0.572466	0.908417	0.897394	0.825		0.888783	0.089	0.596344	0.898774	0.880265	0.861213
0.891985	0.0821031	0.580486	0.91699	0.907294	0.835971		0.906101	0.089	0.604255	0.908674	0.88909	0.880588
0.88	0.0820909	0.580519	0.909094	0.898176	0.825		0.89015	0.089	0.596126	0.899556	0.880962	0.862743
0.88	0.0820859	0.580486	0.905837	0.894414	0.825		0.883569	0.089	0.597987	0.895794	0.877608	0.86
0.904536	0.0821147	0.572466	0.924428	0.915884	0.849788		0.921127	0.089	0.594329	0.917264	0.896747	0.888
0.886099	0.0820977	0.572116	0.913501	0.903266	0.829491		0.899054	0.089	0.596771	0.904646	0.885499	0.872704
0.889296	0.0821007	0.580486	0.915396	0.905454	0.83301		0.902881	0.089	0.583857	0.906834	0.887449	0.876986
0.88	0.0820858	0.572083	0.905756	0.894321	0.825		0.883407	0.089	0.595165	0.895701	0.877525	0.86
0.882626	0.0820946	0.572116	0.911443	0.900889	0.825667		0.894896	0.089	0.594548	0.902269	0.88338	0.868052
0.889769	0.0821011	0.572083	0.915677	0.905777	0.833531		0.903448	0.089	0.599217	0.907157	0.887738	0.877619
0.88	0.0820885	0.572148	0.907525	0.896364	0.825		0.88698	0.089	0.595719	0.897744	0.879346	0.86
0.892655	0.0821038	0.580486	0.917387	0.907753	0.836708		0.906903	0.089	0.607019	0.909133	0.889498	0.881485
0.882013	0.082094	0.572409	0.91108	0.900469	0.825		0.894162	0.089	0.594971	0.901849	0.883006	0.867231
0.885381	0.0820971	0.572441	0.913076	0.902774	0.8287		0.898193	0.089	0.594823	0.904154	0.88506	0.871741
0.882001	0.082094	0.580453	0.911073	0.900461	0.825		0.894148	0.089	0.583445	0.901841	0.882999	0.867215
0.90875	0.0821185	0.572466	0.926926	0.918768	0.85		0.925	0.089	0.596932	0.920148	0.899318	0.888
0.888413	0.0820999	0.572083	0.914873	0.904849	0.832038		0.901824	0.089	0.597116	0.906229	0.88691	0.875803
0.88	0.0820894	0.580486	0.908127	0.897059	0.825		0.888197	0.089	0.595456	0.898439	0.879966	0.860557
0.897526	0.0821082	0.580813	0.920274	0.911086	0.842071		0.912734	0.089	0.606826	0.912466	0.89247	0.888
0.88	0.0820878	0.580494	0.907073	0.895843	0.825		0.886068	0.089	0.6048	0.897223	0.878881	0.86
0.890837	0.0821021	0.572083	0.916309	0.906508	0.834706		0.904726	0.089	0.603531	0.907888	0.888389	0.879049
0.88	0.0820804	0.580519	0.902301	0.890331	0.825		0.88	0.089	0.595075	0.891711	0.873968	0.86
0.88	0.0820867	0.572116	0.90638	0.895042	0.825		0.884667	0.089	0.603666	0.896422	0.878168	0.86
0.890706	0.082102	0.580821	0.916232	0.906419	0.834562		0.904569	0.089	0.594116	0.907799	0.888309	0.878874
0.896609	0.0821074	0.572124	0.91973	0.910459	0.841062		0.911637	0.089	0.596994	0.911839	0.891911	0.886782
0.890428	0.0821017	0.572401	0.916067	0.906228	0.834256		0.904236	0.089	0.595481	0.907608	0.88814	0.878502
0.887299	0.0820988	0.580755	0.914213	0.904087	0.830812		0.900491	0.089	0.595306	0.905467	0.886231	0.874312
0.885278	0.082097	0.580519	0.913015	0.902704	0.828587		0.898071	0.089	0.596038	0.904084	0.884998	0.871604
0.88	0.0820852	0.572083	0.905409	0.89392	0.825		0.882705	0.089	0.60656	0.8953	0.877168	0.86
0.880714	0.0820928	0.580428	0.91031	0.89958	0.825		0.892606	0.089	0.585064	0.90096	0.882213	0.86549
0.883539	0.0820954	0.572433	0.911984	0.901514	0.826672		0.895989	0.089	0.596195	0.902894	0.883937	0.869275
0.900083	0.0821106	0.572116	0.921789	0.912836	0.844885		0.915795	0.089	0.588988	0.914216	0.89403	0.888
0.892305	0.0821034	0.572116	0.91718	0.907513	0.836323		0.906484	0.089	0.597427	0.908893	0.889285	0.881017
0.88	0.0820824	0.572148	0.903571	0.891798	0.825		0.88	0.089	0.594998	0.893178	0.875276	0.86
0.892093	0.0821032	0.572466	0.917054	0.907368	0.836089		0.906229	0.089	0.593401	0.908748	0.889155	0.880732
0.884363	0.0820961	0.580813	0.912472	0.902077	0.827579		0.896975	0.089	0.593095	0.903457	0.884439	0.870378
0.881182	0.0820932	0.580519	0.910587	0.8999	0.825		0.893166	0.089	0.607818	0.90128	0.882498	0.866117
0.895227	0.0821061	0.572441	0.918911	0.909513	0.83954		0.909982	0.089	0.594902	0.910893	0.891068	0.88493
0.899798	0.0821103	0.572433	0.92162	0.912641	0.844572		0.915455	0.089	0.596816	0.914021	0.893856	0.888
0.898711	0.0821093	0.572401	0.920976	0.911897	0.843375		0.914153	0.089	0.600952	0.913277	0.893193	0.888
0.88	0.0820916	0.58078	0.909539	0.898689	0.825		0.891048	0.089	0.604929	0.900069	0.881419	0.863747
0.88519	0.0820969	0.572116	0.912962	0.902643	0.828489		0.897965	0.089	0.594556	0.904023	0.884944	0.871485
0.892171	0.0821033	0.580788	0.9171	0.907421	0.836175		0.906323	0.089	0.601644	0.908801	0.889203	0.880836
0.899193	0.0821098	0.580486	0.921262	0.912228	0.843907		0.914731	0.089	0.597082	0.913608	0.893487	0.888
0.883337	0.0820952	0.580519	0.911865	0.901375	0.82645		0.895747	0.089	0.597234	0.902755	0.883813	0.869004
0.886536	0.0820981	0.580813	0.913761	0.903565	0.829972		0.899577	0.089	0.600619	0.904945	0.885765	0.873289
0.88	0.0820889	0.580846	0.907813	0.896697	0.825		0.887562	0.089	0.614688	0.898077	0.879643	0.86
0.88	0.082088	0.580519	0.907233	0.896026	0.825		0.88639	0.089	0.600478	0.897406	0.879045	0.86
0.897417	0.0821081	0.580461	0.920209	0.911011	0.84195		0.912603	0.089	0.595791	0.912391	0.892403	0.887863
0.903343	0.0821136	0.572059	0.923721	0.915068	0.848475		0.919699	0.089	0.596737	0.916448	0.896019	0.888
0.887775	0.0820993	0.580813	0.914495	0.904413	0.831336		0.90106	0.089	0.605994	0.905793	0.886521	0.874949
0.899499	0.08211	0.580494	0.921443	0.912436	0.844242		0.915096	0.089	0.602347	0.913816	0.893673	0.888
0.892502	0.0821036	0.58078	0.917296	0.907648	0.83654		0.906719	0.089	0.614209	0.909028	0.889405	0.88128
0.881528	0.0820935	0.572091	0.910793	0.900137	0.825		0.893581	0.089	0.59749	0.901517	0.88271	0.866581
0.892499	0.0821036	0.572083	0.917295	0.907646	0.836537		0.906716	0.089	0.603469	0.909026	0.889403	0.881276
0.905325	0.0821154	0.572433	0.924896	0.916424	0.85		0.922071	0.089	0.582548	0.917804	0.897228	0.888
0.888169	0.0820996	0.572148	0.914729	0.904683	0.83177		0.901532	0.089	0.601186	0.906063	0.886762	0.875477
0.905615	0.0821156	0.58078	0.925068	0.916622	0.85		0.922419	0.089	0.593918	0.918002	0.897405	0.888
0.88	0.0820738	0.572409	0.9	0.888	0.825		0.88	0.089	0.607018	0.89	0.869579	0.86
0.897519	0.0821082	0.580486	0.920269	0.911081	0.842063		0.912726	0.089	0.603368	0.912461	0.892466	0.888
0.889509	0.0821009	0.58078	0.915522	0.905599	0.833245		0.903136	0.089	0.601177	0.906979	0.887579	0.877271
0.885301	0.082097	0.580486	0.913028	0.902719	0.828612		0.898098	0.089	0.597391	0.904099	0.885012	0.871634
0.88956	0.0821009	0.572124	0.915553	0.905635	0.833301		0.903197	0.089	0.607348	0.907015	0.88761	0.87734
0.88	0.0820801	0.572083	0.90212	0.890123	0.825		0.88	0.089	0.604666	0.891503	0.873783	0.86
0.886166	0.0820978	0.572116	0.913541	0.903311	0.829564		0.899133	0.089	0.60241	0.904691	0.885539	0.872793
0.892453	0.0821036	0.580846	0.917267	0.907614	0.836485		0.90666	0.089	0.596752	0.908994	0.889375	0.881214
0.904669	0.0821148	0.580813	0.924507	0.915975	0.849935		0.921287	0.089	0.603079	0.917355	0.896828	0.888
0.882911	0.0820948	0.572441	0.911612	0.901084	0.825981		0.895237	0.089	0.596117	0.902464	0.883554	0.868433
0.88	0.0820919	0.58078	0.909737	0.898919	0.825		0.891449	0.089	0.604874	0.900299	0.881624	0.864196
0.883091	0.082095	0.572083	0.911719	0.901207	0.826179		0.895452	0.089	0.600629	0.902587	0.883663	0.868674
0.898538	0.0821092	0.580461	0.920873	0.911779	0.843185		0.913946	0.089	0.589167	0.913159	0.893087	0.888
0.892143	0.0821033	0.572148	0.917084	0.907402	0.836145		0.90629	0.089	0.59587	0.908782	0.889186	0.8808
0.882786	0.0820947	0.580813	0.911538	0.900998	0.825843		0.895087	0.089	0.596506	0.902378	0.883477	0.868266
0.894155	0.0821051	0.572409	0.918276	0.908779	0.838359		0.908698	0.089	0.596444	0.910159	0.890413	0.883494
0.889618	0.082101	0.580486	0.915587	0.905674	0.833365		0.903267	0.089	0.597197	0.907054	0.887646	0.877417
0.899118	0.0821097	0.580788	0.921217	0.912176	0.843824		0.914641	0.089	0.596408	0.913556	0.893441	0.888
0.880908	0.082093	0.580494	0.910425	0.899713	0.825		0.892838	0.089	0.605275	0.901093	0.882331	0.86575
0.884988	0.0820967	0.572433	0.912843	0.902506	0.828268		0.897724	0.089	0.600612	0.903886	0.884821	0.871216
0.884286	0.0820961	0.572148	0.912427	0.902025	0.827495		0.896883	0.089	0.603567	0.903405	0.884392	0.870275
0.88	0.0820854	0.580846	0.905506	0.894032	0.825		0.882901	0.089	0.595058	0.895412	0.877268	0.86
0.891788	0.082103	0.580813	0.916873	0.907159	0.835753		0.905864	0.089	0.60492	0.908539	0.888969	0.880323
0.891406	0.0821026	0.572116	0.916646	0.906897	0.835333		0.905407	0.089	0.597437	0.908277	0.888736	0.879811
0.888616	0.0821001	0.580486	0.914993	0.904988	0.832261		0.902067	0.089	0.597002	0.906368	0.887034	0.876075
0.886003	0.0820977	0.580846	0.913445	0.9032	0.829385		0.898939	0.089	0.58302	0.90458	0.88544	0.872575
0.888809	0.082099	0.57644	0.914309	0.904201	0.832884		0.900875	0.089	0.598011	0.905587	0.886309	0.874542
0.00776132	9.03616e-06	0.00420706	0.00578573	0.00667337	0.00784962		0.01125	9.03617e-13	0.00603046	0.00665859	0.00600905	0.00967169

## Sheet: CPIO
TPR	FPR	fitness	acc	F1	precision	左RF右DT	TPR	FPR	fitness	acc	F1	precision
0.881	0.088	0.57757	0.890614	0.889406	0.845757		0.85	0.089	0.589861	0.898199	0.896883	0.86049
0.887	0.088	0.579764	0.895759	0.894478	0.855638		0.886	0.089	0.577294	0.876242	0.875208	0.820981
0.844	0.088	0.588863	0.873758	0.872765	0.816622		0.847	0.088	0.577286	0.875133	0.874115	0.819082
0.793	0.089	0.590332	0.838671	0.838216	0.760955		0.848	0.088	0.589086	0.875089	0.874072	0.819006
0.839	0.088	0.609252	0.894961	0.893683	0.854358		0.85	0.088	0.589791	0.875089	0.874072	0.819006
0.848	0.089	0.580196	0.893985	0.892728	0.852208		0.886	0.089	0.589774	0.897046	0.895744	0.858251
0.88	0.088	0.579233	0.897001	0.895709	0.85789		0.848	0.088	0.589869	0.896957	0.895656	0.858085
0.79	0.088	0.586293	0.872605	0.871608	0.815248		0.847	0.088	0.577269	0.876242	0.87521	0.820922
0.883	0.087	0.592978	0.894606	0.893338	0.853494		0.848	0.088	0.589764	0.896868	0.895567	0.857988
0.784	0.088	0.587916	0.871097	0.870137	0.812299		0.847	0.089	0.589808	0.896957	0.895652	0.858223
0.843	0.087	0.59209	0.841111	0.840616	0.764706		0.888	0.089	0.589843	0.898243	0.896929	0.860504
0.886	0.088	0.594711	0.865641	0.864787	0.802572		0.886	0.088	0.577261	0.875133	0.874117	0.819023
0.79	0.088	0.576869	0.865596	0.86473	0.802883		0.886	0.089	0.577236	0.875	0.873986	0.818796
0.843	0.089	0.589687	0.864399	0.863526	0.801632		0.848	0.088	0.577286	0.896824	0.895523	0.857904
0.85	0.088	0.612485	0.893985	0.892722	0.852412		0.886	0.088	0.577261	0.896913	0.895608	0.85814
0.833	0.089	0.578013	0.895316	0.894038	0.854881		0.847	0.088	0.589748	0.896957	0.895652	0.858223
0.887	0.089	0.609724	0.872427	0.871454	0.814369		0.886	0.089	0.577286	0.875	0.873988	0.818737
0.833	0.089	0.578448	0.894074	0.89281	0.852576		0.85	0.089	0.589017	0.875044	0.874028	0.81893
0.794	0.088	0.576012	0.865641	0.86477	0.803066		0.848	0.089	0.589834	0.898199	0.896881	0.86056
0.828	0.089	0.577245	0.876819	0.87578	0.821853		0.886	0.089	0.577211	0.897001	0.895696	0.858307
0.781	0.088	0.577813	0.875089	0.874078	0.818829		0.85	0.089	0.577186	0.875177	0.874163	0.81904
0.878	0.088	0.577253	0.875222	0.874211	0.818997		0.848	0.088	0.589017	0.897001	0.895698	0.858237
0.836	0.088	0.579187	0.895005	0.893729	0.854372		0.886	0.088	0.589895	0.875222	0.874207	0.819115
0.841	0.089	0.591608	0.873581	0.872592	0.816263		0.847	0.088	0.576503	0.898199	0.896883	0.86049
0.845	0.088	0.590619	0.8923	0.89105	0.849506		0.886	0.089	0.577219	0.898243	0.896929	0.860504
0.854	0.088	0.576386	0.844304	0.843762	0.769492		0.847	0.088	0.576536	0.896868	0.895567	0.857988
0.883	0.088	0.608859	0.847809	0.847214	0.774812		0.886	0.088	0.576536	0.898066	0.896751	0.860239
0.848	0.088	0.610387	0.871185	0.870232	0.812219		0.888	0.088	0.589887	0.875044	0.874032	0.818812
0.89	0.088	0.57787	0.874113	0.873126	0.816874		0.848	0.089	0.58913	0.897001	0.895696	0.858307
0.846	0.088	0.57814	0.89536	0.894082	0.854963		0.886	0.089	0.589843	0.876198	0.875164	0.820905
0.846	0.088	0.590498	0.843817	0.843287	0.768617		0.848	0.088	0.589861	0.89678	0.895479	0.857821
0.887	0.089	0.595304	0.87602	0.875014	0.819889		0.849	0.088	0.589782	0.876198	0.875164	0.820905
0.826	0.088	0.59125	0.876553	0.875516	0.821455		0.85	0.088	0.589826	0.875	0.873986	0.818796
0.828	0.087	0.58064	0.894695	0.893434	0.853386		0.886	0.089	0.577211	0.898066	0.896749	0.860309
0.827	0.088	0.577604	0.872649	0.871688	0.81428		0.886	0.089	0.577286	0.876242	0.87521	0.820922
0.846	0.088	0.590909	0.89465	0.89338	0.853644		0.85	0.089	0.577177	0.875	0.873986	0.818796
0.842	0.088	0.594187	0.873536	0.872556	0.815954		0.888	0.089	0.576519	0.875133	0.874117	0.819023
0.879	0.088	0.609558	0.839736	0.839245	0.763117		0.85	0.088	0.589895	0.875044	0.874032	0.818812
0.79	0.088	0.597356	0.897312	0.896024	0.858194		0.886	0.089	0.576486	0.876375	0.875341	0.82115
0.849	0.088	0.578115	0.871584	0.870617	0.81312		0.888	0.089	0.589791	0.896913	0.895613	0.858001
0.888	0.088	0.576245	0.874335	0.873331	0.817661		0.886	0.089	0.577228	0.876375	0.875341	0.82115
0.828	0.088	0.578479	0.897134	0.895851	0.857793		0.886	0.089	0.589164	0.876331	0.875298	0.821074
0.887	0.088	0.580905	0.89709	0.895807	0.85771		0.886	0.089	0.589052	0.875133	0.874117	0.819023
0.828	0.088	0.595944	0.876198	0.87517	0.820727		0.848	0.088	0.589887	0.874956	0.873943	0.81872
0.854	0.089	0.57631	0.878371	0.877309	0.824592		0.886	0.089	0.576511	0.876242	0.875208	0.820981
0.787	0.088	0.596878	0.844171	0.843639	0.769057		0.886	0.088	0.576586	0.876375	0.875339	0.82121
0.83	0.088	0.593457	0.896957	0.895661	0.857946		0.848	0.088	0.589138	0.897001	0.895696	0.858307
0.887	0.088	0.589504	0.871984	0.871021	0.813505		0.848	0.088	0.576544	0.897001	0.8957	0.858168
0.846	0.088	0.595385	0.876153	0.875145	0.820117		0.85	0.088	0.577294	0.875133	0.874117	0.819023
0.881	0.088	0.590438	0.84528	0.844735	0.770636		0.847	0.088	0.589774	0.876375	0.875341	0.82115
0.886	0.089	0.596004	0.864709	0.86386	0.801321		0.847	0.089	0.577286	0.898066	0.896749	0.860309
0.842	0.088	0.592977	0.865463	0.864612	0.802281		0.886	0.089	0.589782	0.876375	0.875341	0.82115
0.882	0.088	0.595579	0.864798	0.86394	0.801684		0.886	0.089	0.589843	0.896824	0.895521	0.857974
0.886	0.088	0.579279	0.895493	0.894232	0.854595		0.85	0.089	0.577294	0.898022	0.896707	0.860155
0.85	0.088	0.593288	0.895981	0.894714	0.855502		0.886	0.089	0.589808	0.898155	0.896841	0.860336
0.844	0.088	0.577619	0.873625	0.872631	0.816455		0.888	0.089	0.589095	0.898199	0.896883	0.86049
0.841	0.089	0.590908	0.890836	0.889617	0.846426		0.85	0.088	0.577244	0.875089	0.874076	0.818888
0.843	0.088	0.578767	0.896114	0.894825	0.856438		0.886	0.089	0.577219	0.875	0.873986	0.818796
0.792	0.089	0.587994	0.897889	0.896586	0.859555		0.886	0.088	0.577228	0.896957	0.895656	0.858085
0.884	0.089	0.598864	0.869855	0.868931	0.809707		0.848	0.088	0.589808	0.898022	0.896705	0.860226
0.843	0.088	0.609528	0.87256	0.871583	0.814651		0.888	0.088	0.576519	0.89678	0.895477	0.857891
0.883	0.088	0.590575	0.894695	0.893411	0.854136		0.886	0.089	0.589756	0.898288	0.896973	0.860587
0.884	0.088	0.578289	0.896513	0.895224	0.857046		0.888	0.089	0.577194	0.875044	0.87403	0.818871
0.872	0.088	0.590506	0.873625	0.872631	0.816455		0.888	0.089	0.577253	0.898066	0.896751	0.860239
0.841	0.088	0.581565	0.873447	0.872477	0.815572		0.888	0.089	0.589869	0.896868	0.895567	0.857988
0.793	0.088	0.590988	0.844083	0.843558	0.768737		0.847	0.088	0.577278	0.875133	0.874117	0.819023
0.844	0.088	0.57763	0.875976	0.874956	0.820228		0.886	0.089	0.589095	0.896913	0.89561	0.858071
0.845	0.088	0.594619	0.86533	0.864454	0.802831		0.886	0.089	0.589852	0.897001	0.895698	0.858237
0.792	0.089	0.577263	0.842175	0.841665	0.766294		0.85	0.089	0.576553	0.875	0.873986	0.818796
0.848	0.088	0.589785	0.873891	0.872894	0.816907		0.85	0.088	0.589764	0.898066	0.896749	0.860309
0.828	0.088	0.592486	0.873935	0.872939	0.816924		0.85	0.088	0.576594	0.876242	0.875208	0.820981
0.851	0.088	0.576869	0.866128	0.865248	0.803923		0.848	0.088	0.577186	0.875	0.873988	0.818737
0.85	0.087	0.577955	0.842441	0.841933	0.766508		0.886	0.089	0.577261	0.876242	0.875212	0.820862
0.844	0.088	0.577128	0.833437	0.833052	0.753447		0.848	0.088	0.576486	0.896957	0.895654	0.858154
0.887	0.088	0.578734	0.897489	0.896301	0.855086		0.886	0.089	0.577319	0.897001	0.8957	0.858168
0.885	0.088	0.591399	0.897667	0.896375	0.85886		0.848	0.088	0.589722	0.898199	0.896881	0.86056
0.882	0.088	0.578426	0.864399	0.863539	0.80125		0.848	0.088	0.577211	0.876242	0.875208	0.820981
0.831	0.088	0.592577	0.875798	0.874787	0.819746		0.847	0.089	0.576594	0.875133	0.874117	0.819023
0.827	0.088	0.608119	0.894296	0.893046	0.852443		0.85	0.088	0.58906	0.896957	0.895652	0.858223
0.886	0.088	0.595979	0.897356	0.896051	0.858834		0.847	0.088	0.589138	0.898066	0.896751	0.860239
0.839	0.088	0.578273	0.895271	0.893992	0.854867		0.888	0.089	0.576569	0.875089	0.874074	0.818947
0.848	0.088	0.592029	0.891146	0.889919	0.847125		0.85	0.088	0.589164	0.876419	0.875387	0.821167
0.882	0.088	0.609752	0.900284	0.898967	0.863729		0.848	0.088	0.576494	0.896913	0.895613	0.858001
0.886	0.088	0.590611	0.892211	0.890965	0.849276		0.848	0.089	0.577253	0.897001	0.895698	0.858237
0.829	0.088	0.590593	0.872028	0.87108	0.813119		0.886	0.089	0.589052	0.898199	0.896883	0.86049
0.789	0.088	0.595179	0.84497	0.844414	0.77059		0.85	0.088	0.576561	0.875	0.873986	0.818796
0.788	0.089	0.594879	0.864886	0.864048	0.801229		0.847	0.088	0.577311	0.876331	0.875296	0.821134
0.814	0.088	0.589722	0.868524	0.867611	0.807773		0.886	0.089	0.589069	0.875089	0.874074	0.818947
0.846	0.088	0.577789	0.895449	0.894173	0.854991		0.847	0.088	0.58906	0.875133	0.874117	0.819023
0.839	0.088	0.610862	0.895937	0.894654	0.855969		0.847	0.089	0.577311	0.898243	0.896927	0.860574
0.888	0.087	0.578414	0.877528	0.876488	0.822835		0.886	0.089	0.577194	0.875133	0.874119	0.818964
0.88	0.088	0.576586	0.896691	0.895393	0.857586		0.886	0.089	0.589782	0.89811	0.896795	0.860323
0.884	0.088	0.596476	0.896957	0.895658	0.858015		0.847	0.088	0.589817	0.896913	0.895613	0.858001
0.888	0.088	0.624696	0.894606	0.893344	0.85329		0.886	0.088	0.589852	0.875133	0.874119	0.818964
0.831	0.088	0.576364	0.896247	0.894959	0.856618		0.888	0.088	0.576586	0.875133	0.874117	0.819023
0.883	0.088	0.575971	0.867504	0.866714	0.802937		0.847	0.088	0.589861	0.896868	0.895567	0.857988
0.787	0.088	0.597206	0.893054	0.891776	0.851502		0.848	0.089	0.589078	0.896868	0.895564	0.858057
0.788	0.088	0.577896	0.896247	0.894955	0.856756		0.847	0.088	0.589834	0.896957	0.895656	0.858085
0.828	0.089	0.577236	0.845103	0.844564	0.770274		0.886	0.089	0.589861	0.89678	0.895479	0.857821
0.884	0.089	0.597467	0.87429	0.873295	0.817351		0.888	0.089	0.576569	0.875089	0.874074	0.818947
0.84721	0.08813	0.588545	0.877292	0.876269	0.823628		0.86626	0.08851	0.583291	0.886671	0.885504	0.83972
0.0322501	0.000461628	0.0108579	0.0180955	0.0178388	0.0305106		0.0190995	0.0004999	0.00630534	0.0109647	0.0108212	0.0196964

## Sheet: SPIO
TPR	FPR	fitness	acc	F1	precision	左RF右DT	TPR	FPR	fitness	acc	F1	precision
0.912	0.074	0.598243	0.924114	0.912393	0.886679		0.83	0.065	0.649575	0.875532	0.874912	0.807025
0.913	0.067	0.59891	0.915576	0.906623	0.816671		0.829	0.064	0.651416	0.870963	0.870418	0.79912
0.929	0.097	0.598225	0.912873	0.903969	0.808737		0.826	0.064	0.648133	0.873536	0.872955	0.803325
0.896	0.047	0.598294	0.918844	0.909481	0.831782		0.821	0.063	0.647536	0.874512	0.873944	0.803975
0.897	0.049	0.598416	0.913209	0.904326	0.809367		0.828	0.063	0.64833	0.873447	0.872866	0.803237
0.909	0.065	0.598019	0.925984	0.915622	0.871546		0.828	0.065	0.650819	0.868923	0.868388	0.79642
0.897	0.05	0.599923	0.911749	0.90284	0.805875		0.821	0.065	0.650661	0.875577	0.874988	0.805954
0.894	0.048	0.59933	0.913985	0.905095	0.811514		0.831	0.065	0.660639	0.875887	0.875298	0.806346
0.894	0.048	0.599237	0.914869	0.905353	0.822177		0.821	0.063	0.650268	0.875222	0.874648	0.805005
0.906	0.066	0.599723	0.915257	0.905805	0.822427		0.819	0.065	0.650838	0.875222	0.874618	0.806088
0.894	0.048	0.597719	0.911886	0.902975	0.80626		0.804	0.065	0.647337	0.875577	0.874986	0.806009
0.905	0.064	0.598366	0.912508	0.903505	0.809029		0.83	0.063	0.64666	0.875266	0.874649	0.806595
0.896	0.049	0.598481	0.913768	0.90491	0.810516		0.794	0.062	0.658565	0.857523	0.857134	0.77876
0.897	0.049	0.598109	0.911789	0.902821	0.80672		0.792	0.064	0.64815	0.854152	0.853811	0.773436
0.901	0.055	0.598541	0.913483	0.904562	0.81057		0.818	0.063	0.648104	0.869278	0.868753	0.796459
0.894	0.046	0.598195	0.913226	0.90431	0.809836		0.829	0.064	0.658102	0.869721	0.869215	0.796325
0.892	0.046	0.598776	0.914401	0.905571	0.811847		0.82	0.065	0.650249	0.869189	0.868689	0.79549
0.895	0.05	0.598001	0.912034	0.903089	0.807068		0.803	0.065	0.656771	0.870076	0.869527	0.798241
0.914	0.074	0.59924	0.912878	0.903984	0.808637		0.82	0.065	0.647836	0.873536	0.872958	0.803218
0.911	0.062	0.597741	0.914572	0.905692	0.81297		0.828	0.064	0.65048	0.875798	0.875209	0.806257
0.906	0.064	0.59837	0.913209	0.904259	0.810224		0.827	0.062	0.647752	0.875887	0.875281	0.806944
0.914	0.067	0.598514	0.913409	0.904572	0.80929		0.822	0.064	0.66039	0.869278	0.868746	0.796719
0.924	0.084	0.598536	0.913181	0.904296	0.809306		0.828	0.065	0.65044	0.876553	0.875956	0.807365
0.908	0.066	0.598817	0.913774	0.904827	0.811683		0.82	0.065	0.651123	0.875577	0.874963	0.806824
0.895	0.048	0.597868	0.914264	0.905366	0.812368		0.828	0.065	0.648104	0.870387	0.869873	0.79732
0.905	0.065	0.598182	0.912274	0.903289	0.808198		0.827	0.064	0.657384	0.869855	0.869321	0.797419
0.897	0.049	0.601197	0.921832	0.910959	0.864176		0.828	0.065	0.660849	0.874512	0.873915	0.804999
0.893	0.048	0.600193	0.91419	0.905242	0.812817		0.819	0.064	0.650087	0.874512	0.873911	0.805161
0.897	0.05	0.598763	0.913249	0.904327	0.80997		0.801	0.063	0.659827	0.870653	0.870133	0.797843
0.91	0.069	0.598699	0.913289	0.904448	0.809033		0.8	0.063	0.651391	0.875044	0.874447	0.805639
0.909	0.068	0.603558	0.91362	0.904647	0.811606		0.827	0.063	0.648312	0.868391	0.867875	0.795168
0.895	0.048	0.598684	0.918074	0.908563	0.831536		0.801	0.065	0.66106	0.860495	0.860101	0.782142
0.895	0.047	0.598643	0.91358	0.904712	0.810147		0.819	0.063	0.647071	0.874645	0.874077	0.804135
0.895	0.047	0.598285	0.919055	0.909747	0.831638		0.83	0.063	0.657356	0.869411	0.868868	0.797242
0.894	0.044	0.599671	0.911897	0.902901	0.807352		0.83	0.065	0.657797	0.873314	0.872756	0.802275
0.896	0.048	0.599112	0.919927	0.910108	0.841749		0.82	0.065	0.647692	0.855704	0.855366	0.774996
0.909	0.064	0.598696	0.913352	0.904419	0.810381		0.793	0.065	0.65704	0.875532	0.874956	0.80545
0.911	0.064	0.599364	0.913859	0.905051	0.810119		0.827	0.065	0.657714	0.858765	0.858368	0.780394
0.895	0.047	0.599872	0.913551	0.903956	0.819477		0.828	0.063	0.650125	0.869677	0.869136	0.797505
0.894	0.049	0.599097	0.913283	0.904328	0.810478		0.801	0.065	0.648113	0.854418	0.854071	0.773971
0.912	0.065	0.598278	0.913278	0.9044	0.809477		0.818	0.065	0.650497	0.870209	0.869692	0.797249
0.912	0.065	0.599704	0.9137	0.90485	0.810227		0.825	0.063	0.647966	0.869322	0.868793	0.796685
0.895	0.047	0.598144	0.912086	0.90311	0.807588		0.83	0.063	0.650679	0.869855	0.869314	0.797681
0.906	0.063	0.60052	0.920315	0.910445	0.843759		0.793	0.065	0.66108	0.875	0.874405	0.805514
0.909	0.059	0.598432	0.913922	0.905075	0.810782		0.8	0.065	0.649431	0.869588	0.869057	0.797052
0.896	0.048	0.598783	0.914019	0.905039	0.812769		0.792	0.063	0.647275	0.873935	0.873346	0.804073
0.899	0.049	0.598536	0.914846	0.905965	0.81371		0.8	0.063	0.651233	0.855793	0.855457	0.774987
0.894	0.047	0.597716	0.918165	0.907797	0.843979		0.793	0.065	0.647781	0.874823	0.874228	0.805282
0.896	0.049	0.59909	0.912325	0.903419	0.807338		0.828	0.064	0.650858	0.874512	0.873918	0.804891
0.911	0.068	0.598333	0.914698	0.905794	0.813607		0.829	0.065	0.648191	0.875133	0.874532	0.805891
0.897	0.05	0.598082	0.919465	0.910201	0.832262		0.822	0.065	0.647523	0.87123	0.870698	0.798911
0.906	0.064	0.600866	0.919585	0.910309	0.832793		0.82	0.064	0.647157	0.874113	0.873523	0.804304
0.908	0.065	0.598542	0.913414	0.90385	0.818691		0.83	0.065	0.647393	0.85362	0.853285	0.772646
0.896	0.049	0.598128	0.914002	0.905093	0.811798		0.819	0.065	0.647442	0.869278	0.868751	0.796563
0.895	0.047	0.597593	0.91188	0.902951	0.80647		0.83	0.063	0.64718	0.854063	0.853712	0.773723
0.894	0.047	0.600354	0.91366	0.904731	0.811142		0.819	0.063	0.661772	0.870919	0.870368	0.799261
0.895	0.049	0.598605	0.914144	0.904604	0.820431		0.826	0.065	0.647454	0.870209	0.869669	0.798085
0.905	0.064	0.59783	0.919095	0.909747	0.832321		0.83	0.065	0.648209	0.859297	0.858913	0.780475
0.898	0.048	0.602489	0.919226	0.909869	0.832859		0.829	0.063	0.646865	0.871008	0.870459	0.799296
0.893	0.047	0.598559	0.920407	0.910515	0.844375		0.82	0.063	0.649794	0.876331	0.875742	0.806843
0.895	0.048	0.60029	0.917909	0.908523	0.829286		0.819	0.063	0.65018	0.858898	0.858501	0.780546
0.91	0.067	0.598353	0.912702	0.903781	0.8085		0.822	0.065	0.649881	0.858676	0.858302	0.779443
0.894	0.047	0.600365	0.915034	0.905578	0.821854		0.82	0.063	0.646613	0.874113	0.873509	0.804789
0.898	0.049	0.597901	0.914099	0.905245	0.811353		0.828	0.065	0.658111	0.869455	0.868927	0.79679
0.897	0.05	0.598398	0.913614	0.904792	0.809647		0.828	0.065	0.651011	0.874157	0.873562	0.804537
0.942	0.11	0.600117	0.918986	0.909567	0.833012		0.822	0.065	0.647055	0.873758	0.873197	0.802877
0.921	0.09	0.598294	0.914435	0.905536	0.812844		0.82	0.063	0.647684	0.868612	0.868092	0.795568
0.898	0.046	0.600857	0.913032	0.904078	0.809804		0.828	0.065	0.650818	0.858366	0.857976	0.779694
0.894	0.048	0.598353	0.913414	0.904591	0.809134		0.83	0.063	0.65042	0.870076	0.869533	0.798031
0.905	0.072	0.600221	0.912901	0.903957	0.809333		0.82	0.065	0.648811	0.870786	0.870265	0.798053
0.895	0.048	0.597808	0.912719	0.903721	0.809532		0.795	0.065	0.660608	0.855039	0.854682	0.774989
0.896	0.047	0.598032	0.912856	0.903901	0.809338		0.803	0.065	0.651031	0.87083	0.870279	0.799173
0.899	0.051	0.59835	0.920213	0.91021	0.845375		0.82	0.063	0.650211	0.875798	0.87519	0.80691
0.897	0.049	0.601584	0.915947	0.906442	0.825133		0.801	0.063	0.65691	0.874202	0.873613	0.804338
0.896	0.05	0.598519	0.912696	0.903781	0.808413		0.817	0.065	0.647394	0.854507	0.854163	0.773916
0.98	0.209	0.598135	0.915833	0.906943	0.816525		0.828	0.064	0.650193	0.869455	0.868914	0.797259
0.894	0.049	0.599683	0.912348	0.903399	0.807937		0.828	0.065	0.650451	0.873935	0.873367	0.803321
0.896	0.047	0.603342	0.913038	0.904125	0.80929		0.82	0.065	0.66035	0.870209	0.8697	0.796989
0.896	0.05	0.59941	0.914783	0.905845	0.814293		0.83	0.063	0.647376	0.873758	0.87316	0.804165
0.91	0.066	0.59807	0.912707	0.903797	0.808381		0.801	0.065	0.649729	0.855527	0.855168	0.775576
0.893	0.048	0.598452	0.911652	0.902684	0.806362		0.819	0.064	0.650181	0.860539	0.860148	0.782063
0.91	0.07	0.598228	0.919819	0.910481	0.83441		0.827	0.063	0.65092	0.855172	0.854813	0.775188
0.895	0.049	0.598509	0.912901	0.904017	0.808564		0.827	0.065	0.65686	0.875532	0.874923	0.806644
0.894	0.048	0.598608	0.914515	0.904998	0.821176		0.828	0.065	0.64814	0.870254	0.869741	0.797162
0.896	0.049	0.601015	0.911709	0.902729	0.80666		0.82	0.065	0.658319	0.868701	0.868181	0.795656
0.895	0.051	0.598862	0.913876	0.904942	0.811801		0.828	0.065	0.647885	0.869455	0.868951	0.795959
0.896	0.05	0.600456	0.914327	0.905435	0.812456		0.83	0.065	0.651541	0.875177	0.874597	0.805204
0.903	0.064	0.598355	0.915251	0.905794	0.822474		0.82	0.065	0.647419	0.854108	0.853768	0.77337
0.906	0.064	0.600153	0.91257	0.903561	0.809287		0.827	0.063	0.650219	0.87398	0.873385	0.804305
0.913	0.064	0.599165	0.919642	0.909145	0.85077		0.82	0.064	0.650896	0.870165	0.869653	0.797023
0.905	0.071	0.598255	0.912901	0.904033	0.808359		0.819	0.065	0.649886	0.873891	0.873296	0.804217
0.894	0.047	0.59754	0.914584	0.905685	0.813234		0.827	0.065	0.650486	0.87083	0.870313	0.797967
0.909	0.071	0.599396	0.920675	0.911435	0.835616		0.801	0.065	0.646686	0.869233	0.868708	0.796441
0.897	0.048	0.598566	0.913534	0.904571	0.811259		0.804	0.065	0.661248	0.869056	0.868562	0.795127
0.896	0.049	0.598485	0.917429	0.908007	0.828362		0.828	0.065	0.650654	0.869899	0.869387	0.796708
0.894	0.049	0.597979	0.914219	0.90531	0.812383		0.827	0.063	0.647313	0.869899	0.869355	0.797856
0.925	0.085	0.598557	0.912445	0.903497	0.808173		0.82	0.063	0.650769	0.875266	0.874692	0.805077
0.922	0.09	0.600794	0.919659	0.910325	0.833867		0.791	0.065	0.651244	0.859342	0.858939	0.781218
0.895	0.044	0.597482	0.917646	0.908176	0.829684		0.822	0.064	0.660245	0.860628	0.860236	0.782198
0.902586	0.0584242	0.598981	0.914957	0.905791	0.818303		0.819051	0.0641919	0.651431	0.869102	0.868583	0.796187
0.0121481	0.0198046	0.0011713	0.00297205	0.00261859	0.0147875		0.0116423	0.00093934	0.00449639	0.0068347	0.00675066	0.0105702

## Sheet: IG
TPR	FPR	fitness	acc	F1	precision	左RF右DT	TPR	FPR	fitness	acc	F1	precision
0.619	0.031	0.669256	0.79214	0.791838	0.683515		0.694	0.061	0.649297	0.798572	0.798547	0.69757
0.624	0.03	0.649052	0.764549	0.763414	0.652935		0.713	0.056	0.645813	0.815516	0.815506	0.719204
0.658	0.032	0.650888	0.768142	0.767048	0.655933		0.712	0.054	0.637539	0.800834	0.800816	0.700115
0.579	0.035	0.647432	0.756166	0.754478	0.643314		0.714	0.058	0.640621	0.817779	0.81777	0.720921
0.691	0.034	0.671087	0.757275	0.756913	0.654674		0.702	0.061	0.649734	0.813919	0.813913	0.717234
0.689	0.035	0.682139	0.779454	0.779192	0.674113		0.697	0.059	0.640017	0.797507	0.797479	0.696412
0.597	0.029	0.666269	0.794713	0.794358	0.684581		0.689	0.055	0.647606	0.811302	0.811302	0.711955
0.667	0.035	0.660563	0.779187	0.778528	0.668278		0.711	0.057	0.646268	0.818754	0.818745	0.721964
0.674	0.038	0.659683	0.76965	0.768563	0.657115		0.717	0.059	0.648357	0.812677	0.812677	0.713774
0.639	0.027	0.671215	0.807266	0.807093	0.698623		0.694	0.06	0.648852	0.799503	0.799476	0.698175
0.641	0.036	0.643293	0.783313	0.782893	0.674552		0.719	0.057	0.64609	0.798749	0.798726	0.697904
0.658	0.035	0.65932	0.774131	0.773286	0.662538		0.72	0.063	0.639683	0.813165	0.813165	0.713686
0.62	0.031	0.647279	0.76832	0.767277	0.656464		0.69	0.055	0.64532	0.812234	0.812234	0.713251
0.69	0.03	0.649445	0.764416	0.76356	0.655039		0.691	0.054	0.647927	0.797729	0.797702	0.696738
0.644	0.031	0.653763	0.803141	0.802971	0.695369		0.718	0.06	0.647337	0.804161	0.804155	0.704479
0.633	0.034	0.660946	0.811125	0.811067	0.706131		0.723	0.064	0.641652	0.80079	0.80077	0.699939
0.707	0.078	0.653357	0.794003	0.79367	0.684402		0.714	0.058	0.647134	0.797818	0.797788	0.696604
0.611	0.032	0.655742	0.772933	0.772492	0.666064		0.712	0.06	0.640375	0.811968	0.811967	0.712291
0.652	0.038	0.646913	0.819065	0.819053	0.716349		0.719	0.057	0.646321	0.811968	0.811967	0.71365
0.631	0.029	0.650047	0.787438	0.786927	0.676473		0.69	0.058	0.639277	0.812278	0.812278	0.713307
0.666	0.045	0.662899	0.781938	0.781434	0.672296		0.723	0.062	0.649721	0.802874	0.80287	0.703469
0.587	0.029	0.672286	0.763086	0.761965	0.651947		0.716	0.061	0.648673	0.812367	0.812367	0.713385
0.585	0.028	0.647156	0.781982	0.781474	0.67227		0.701	0.058	0.647184	0.803451	0.803448	0.704208
0.634	0.029	0.644787	0.788148	0.78771	0.678069		0.713	0.057	0.638243	0.799725	0.799712	0.699631
0.624	0.03	0.661234	0.785664	0.785095	0.674337		0.696	0.059	0.647413	0.798882	0.798859	0.698004
0.57	0.033	0.647277	0.766102	0.765004	0.654376		0.689	0.055	0.649077	0.804028	0.804022	0.704347
0.614	0.026	0.655167	0.802786	0.802646	0.695973		0.719	0.062	0.639835	0.800701	0.800677	0.699465
0.626	0.036	0.677844	0.781183	0.780734	0.672441		0.715	0.061	0.648029	0.798616	0.798592	0.697714
0.629	0.03	0.653369	0.785708	0.785158	0.67461		0.692	0.061	0.640577	0.804383	0.804374	0.70412
0.661	0.03	0.701273	0.772134	0.771296	0.661079		0.696	0.057	0.641067	0.80212	0.802105	0.701489
0.657	0.028	0.664999	0.784067	0.783488	0.672977		0.689	0.056	0.648606	0.811258	0.811258	0.712065
0.662	0.036	0.670659	0.777413	0.776564	0.664979		0.714	0.061	0.648737	0.811524	0.811524	0.71296
0.649	0.034	0.67415	0.790454	0.790056	0.680492		0.724	0.062	0.648256	0.812278	0.812278	0.713673
0.656	0.031	0.655307	0.775905	0.775069	0.663968		0.717	0.057	0.639922	0.811435	0.811434	0.713615
0.647	0.028	0.667105	0.795334	0.795098	0.687431		0.69	0.056	0.640228	0.799592	0.799556	0.697678
0.698	0.036	0.658882	0.762731	0.761448	0.650559		0.713	0.057	0.637695	0.812234	0.812234	0.713218
0.687	0.037	0.665861	0.79245	0.792147	0.68373		0.712	0.057	0.64022	0.801144	0.801127	0.700399
0.653	0.031	0.65509	0.78318	0.782833	0.675599		0.724	0.062	0.640568	0.804294	0.804288	0.704547
0.673	0.052	0.653601	0.775639	0.774848	0.664196		0.712	0.058	0.639792	0.800568	0.800529	0.698304
0.66	0.038	0.653954	0.764682	0.763601	0.653434		0.717	0.057	0.638784	0.813387	0.813387	0.715034
0.619	0.031	0.651419	0.793604	0.793276	0.684195		0.691	0.057	0.647731	0.800701	0.800664	0.698554
0.621	0.028	0.666889	0.762021	0.760655	0.649491		0.712	0.058	0.646827	0.81525	0.815241	0.71876
0.673	0.036	0.686783	0.803806	0.80362	0.695475		0.703	0.062	0.638343	0.803584	0.80358	0.704277
0.633	0.048	0.668772	0.775861	0.775214	0.66586		0.696	0.062	0.636696	0.798616	0.798583	0.69702
0.66	0.031	0.642582	0.794136	0.793811	0.684659		0.713	0.06	0.648507	0.815605	0.815604	0.717361
0.653	0.032	0.67337	0.766235	0.765239	0.655269		0.695	0.06	0.640635	0.804649	0.804646	0.705554
0.59	0.033	0.684539	0.796709	0.796315	0.685475		0.693	0.058	0.641107	0.797773	0.797746	0.696731
0.616	0.028	0.64491	0.777635	0.776944	0.666738		0.697	0.06	0.640198	0.812056	0.812055	0.712401
0.572	0.032	0.663237	0.783401	0.782795	0.672133		0.696	0.062	0.639384	0.8011	0.80107	0.699367
0.66	0.069	0.650279	0.78003	0.779372	0.668942		0.725	0.062	0.641834	0.798439	0.798414	0.6975
0.603	0.03	0.663382	0.782337	0.781752	0.671571		0.695	0.056	0.639239	0.811835	0.811833	0.712026
0.64	0.027	0.661003	0.793781	0.793536	0.685966		0.689	0.057	0.649597	0.798439	0.798415	0.697561
0.65	0.036	0.658575	0.779808	0.779307	0.670669		0.719	0.059	0.648463	0.798705	0.798674	0.697247
0.654	0.035	0.655864	0.770804	0.769842	0.658992		0.712	0.058	0.647357	0.816891	0.81687	0.721741
0.666	0.031	0.653228	0.794846	0.794474	0.684382		0.725	0.065	0.639961	0.802386	0.802363	0.700979
0.681	0.033	0.671079	0.79733	0.797137	0.69005		0.715	0.058	0.649533	0.801765	0.801761	0.702582
0.651	0.03	0.662522	0.790499	0.790117	0.680803		0.703	0.058	0.638119	0.799281	0.799246	0.697457
0.598	0.026	0.66303	0.78349	0.782832	0.671593		0.696	0.059	0.649605	0.801765	0.80176	0.702456
0.613	0.027	0.661791	0.767166	0.766211	0.656298		0.718	0.059	0.649451	0.814008	0.814005	0.716528
0.654	0.039	0.660583	0.803806	0.803668	0.696873		0.691	0.06	0.639754	0.801632	0.801628	0.702544
0.642	0.037	0.660385	0.786861	0.786361	0.676171		0.702	0.065	0.638314	0.814718	0.814717	0.716409
0.704	0.029	0.671935	0.788502	0.788245	0.681474		0.712	0.058	0.648342	0.812189	0.812189	0.713862
0.64	0.03	0.669511	0.777502	0.776886	0.667475		0.69	0.058	0.641552	0.812456	0.812456	0.713562
0.641	0.037	0.654116	0.751242	0.749477	0.639321		0.689	0.057	0.640178	0.812189	0.812189	0.713229
0.641	0.035	0.640241	0.797463	0.797232	0.689252		0.695	0.057	0.638989	0.801233	0.801211	0.700077
0.584	0.028	0.657316	0.748891	0.7473	0.63849		0.694	0.059	0.638666	0.816891	0.816886	0.719544
0.604	0.03	0.643069	0.766678	0.765635	0.655228		0.691	0.056	0.647213	0.812677	0.812677	0.713176
0.641	0.03	0.664253	0.779099	0.778446	0.668279		0.696	0.062	0.646411	0.812411	0.812411	0.713374
0.648	0.027	0.681226	0.795733	0.795454	0.686814		0.712	0.061	0.638889	0.799237	0.79919	0.696744
0.626	0.033	0.676551	0.763086	0.761824	0.65096		0.727	0.065	0.639114	0.798838	0.798799	0.696866
0.651	0.032	0.647166	0.767078	0.766057	0.655705		0.696	0.061	0.638823	0.798483	0.798459	0.697554
0.626	0.03	0.661523	0.786551	0.786058	0.676033		0.712	0.057	0.636853	0.797818	0.79779	0.696754
0.605	0.03	0.645919	0.786373	0.786015	0.677935		0.714	0.061	0.649368	0.811702	0.811701	0.712652
0.657	0.03	0.671792	0.782204	0.781515	0.67026		0.714	0.061	0.649484	0.800834	0.80082	0.700453
0.612	0.026	0.663502	0.765259	0.763989	0.652516		0.692	0.06	0.640577	0.800834	0.800815	0.700023
0.602	0.028	0.653945	0.790144	0.789742	0.6802		0.703	0.061	0.640728	0.800656	0.800618	0.69844
0.632	0.029	0.642957	0.781361	0.780825	0.671422		0.695	0.058	0.639999	0.799681	0.799647	0.697875
0.626	0.027	0.652649	0.790011	0.789607	0.680052		0.704	0.059	0.637958	0.812589	0.812588	0.713065
0.67	0.04	0.642038	0.769917	0.76897	0.658448		0.711	0.056	0.648996	0.811302	0.811302	0.713147
0.615	0.03	0.653617	0.79835	0.798078	0.689042		0.718	0.062	0.640269	0.800479	0.80044	0.698228
0.631	0.028	0.656722	0.784022	0.783526	0.674022		0.711	0.057	0.64519	0.810326	0.810326	0.71199
0.662	0.035	0.657925	0.773332	0.772452	0.661609		0.697	0.059	0.647174	0.798439	0.798415	0.697591
0.648	0.028	0.660111	0.790011	0.789551	0.679196		0.716	0.056	0.640864	0.817246	0.817236	0.720761
0.607	0.024	0.664933	0.750266	0.748685	0.63956		0.714	0.058	0.639198	0.812278	0.812277	0.712579
0.595	0.026	0.677109	0.787305	0.786829	0.67686		0.692	0.061	0.650168	0.798572	0.798548	0.69766
0.655	0.041	0.684138	0.763973	0.762709	0.651609		0.712	0.056	0.637663	0.811435	0.811435	0.713515
0.622	0.025	0.670921	0.778877	0.77817	0.667517		0.714	0.058	0.641703	0.812323	0.812319	0.715104
0.627	0.034	0.678232	0.779587	0.779048	0.670013		0.69	0.058	0.647595	0.799636	0.7996	0.697671
0.619	0.043	0.669589	0.781095	0.780472	0.670158		0.711	0.054	0.646365	0.813077	0.813075	0.715248
0.624	0.026	0.647607	0.783313	0.782748	0.672579		0.697	0.057	0.639544	0.811169	0.811169	0.713147
0.653	0.035	0.664591	0.778788	0.778116	0.667827		0.704	0.061	0.636751	0.814984	0.814984	0.716474
0.607	0.029	0.667902	0.773687	0.772955	0.663289		0.69	0.054	0.64947	0.813919	0.813917	0.716246
0.679	0.025	0.662081	0.783313	0.782639	0.671281		0.695	0.059	0.641612	0.812323	0.812323	0.713329
0.644	0.034	0.664745	0.79764	0.797368	0.688484		0.696	0.058	0.640963	0.817867	0.817856	0.721454
0.643	0.037	0.677466	0.732523	0.729942	0.622398		0.717	0.058	0.639148	0.81321	0.813209	0.713675
0.664	0.03	0.654846	0.783224	0.782702	0.673052		0.691	0.058	0.638414	0.813077	0.813076	0.713642
0.66	0.055	0.658671	0.76934	0.76839	0.657981		0.714	0.06	0.637234	0.805092	0.805088	0.705496
0.601	0.03	0.653007	0.785974	0.785519	0.67611		0.723	0.062	0.639998	0.812456	0.812455	0.712899
0.65	0.029	0.644361	0.765614	0.764952	0.65778		0.703	0.06	0.637113	0.814674	0.814673	0.71642
0.618	0.029	0.64971	0.781716	0.781044	0.670075		0.718	0.062	0.640269	0.800479	0.80044	0.698228
0.63845	0.0331	0.660528	0.780502	0.779839	0.670431		0.70567	0.05892	0.643173	0.806764	0.806751	0.707133
0.0294504	0.0078721	0.0115939	0.0143366	0.0147179	0.0153778		0.0115126	0.00249271	0.00440768	0.00671094	0.00672123	0.00815552

## Sheet: ARM
TPR	FPR	fitness	acc	F1	precision	左RF右DT	TPR	FPR	fitness	acc	F1	precision
0.676	0.034	0.660716	0.791829	0.791489	0.682552		0.604	0.035	0.678596	0.78074	0.779989	0.668481
0.662	0.034	0.659691	0.788813	0.78844	0.679608		0.611	0.036	0.685586	0.783313	0.782781	0.673
0.672	0.034	0.668115	0.798927	0.798707	0.690676		0.636	0.031	0.692148	0.782869	0.782359	0.672939
0.658	0.034	0.660925	0.801854	0.801671	0.693964		0.658	0.036	0.658945	0.768542	0.768138	0.663109
0.658	0.035	0.668051	0.790898	0.790544	0.68159		0.632	0.033	0.688686	0.778655	0.778039	0.668355
0.658	0.035	0.667154	0.789922	0.789568	0.680817		0.642	0.03	0.687027	0.771913	0.771082	0.660982
0.658	0.034	0.665927	0.791075	0.790719	0.681683		0.606	0.03	0.676774	0.77972	0.779153	0.669767
0.657	0.035	0.667153	0.799503	0.79929	0.69131		0.609	0.03	0.66954	0.770183	0.76932	0.659372
0.672	0.034	0.658824	0.799326	0.799109	0.691078		0.642	0.03	0.690177	0.778433	0.7777	0.666903
0.677	0.034	0.665895	0.789257	0.788871	0.679762		0.628	0.03	0.676178	0.776215	0.775465	0.66504
0.674	0.034	0.659972	0.790898	0.790538	0.681485		0.639	0.033	0.685089	0.763751	0.762643	0.652543
0.674	0.034	0.665804	0.799281	0.79907	0.691168		0.607	0.06	0.695412	0.777546	0.776775	0.665843
0.676	0.034	0.667046	0.79937	0.799152	0.691072		0.613	0.034	0.6788	0.774308	0.773576	0.663762
0.676	0.034	0.659525	0.790055	0.789696	0.680834		0.664	0.061	0.694454	0.761799	0.760575	0.65026
0.673	0.034	0.667189	0.789833	0.789476	0.680692		0.622	0.031	0.688879	0.766634	0.765625	0.655464
0.658	0.035	0.666257	0.799636	0.799421	0.69135		0.603	0.059	0.686297	0.76415	0.762819	0.651288
0.672	0.034	0.665799	0.798705	0.798483	0.69045		0.64	0.064	0.67707	0.781716	0.781076	0.670438
0.678	0.034	0.665152	0.798483	0.798259	0.690224		0.685	0.035	0.674209	0.77799	0.777204	0.666032
0.658	0.036	0.665608	0.790898	0.790544	0.68159		0.632	0.034	0.675041	0.75865	0.757316	0.647201
0.656	0.035	0.66036	0.802253	0.802079	0.694512		0.6	0.03	0.685153	0.754746	0.753309	0.643672
0.658	0.034	0.665591	0.790055	0.789678	0.680519		0.605	0.063	0.683937	0.765703	0.764486	0.653221
0.676	0.034	0.667313	0.790499	0.790151	0.681382		0.63	0.059	0.691838	0.768453	0.767525	0.657502
0.656	0.034	0.666864	0.788857	0.788485	0.679657		0.631	0.06	0.675021	0.777324	0.776563	0.665771
0.657	0.035	0.659327	0.789123	0.788747	0.679797		0.629	0.035	0.678439	0.786418	0.785945	0.676217
0.673	0.034	0.667553	0.799769	0.79956	0.691616		0.609	0.035	0.672817	0.78145	0.780894	0.671249
0.655	0.034	0.658201	0.801677	0.801496	0.693873		0.616	0.033	0.685657	0.76313	0.761952	0.651571
0.661	0.035	0.66574	0.800124	0.799919	0.691996		0.634	0.064	0.676758	0.788636	0.788157	0.677862
0.656	0.034	0.666668	0.800612	0.800416	0.692614		0.603	0.029	0.691159	0.760735	0.760259	0.655995
0.657	0.034	0.66566	0.790011	0.789639	0.680575		0.618	0.058	0.67946	0.781405	0.780763	0.670177
0.657	0.035	0.660266	0.791874	0.791535	0.682629		0.603	0.028	0.684732	0.768453	0.767434	0.656754
0.677	0.034	0.665672	0.799414	0.799199	0.69118		0.608	0.036	0.680639	0.752262	0.75088	0.642158
0.656	0.034	0.665864	0.802475	0.802305	0.694827		0.619	0.033	0.677871	0.785619	0.785168	0.675898
0.673	0.034	0.657911	0.79112	0.790766	0.681759		0.602	0.064	0.685364	0.777724	0.776946	0.665914
0.675	0.034	0.659974	0.802253	0.802076	0.694455		0.6	0.034	0.688431	0.748802	0.74787	0.642495
0.66	0.035	0.665953	0.802076	0.801895	0.694192		0.623	0.065	0.673996	0.766013	0.764827	0.653665
0.661	0.034	0.660319	0.799991	0.799786	0.691899		0.632	0.032	0.676036	0.755234	0.754525	0.64927
0.677	0.034	0.659806	0.790765	0.790421	0.681653		0.674	0.061	0.683781	0.743568	0.742496	0.637528
0.675	0.034	0.660045	0.801499	0.801317	0.693696		0.624	0.035	0.67809	0.772889	0.771948	0.660738
0.677	0.034	0.659753	0.800124	0.799919	0.691996		0.635	0.035	0.675566	0.768985	0.767936	0.65691
0.673	0.034	0.665544	0.799902	0.799692	0.691684		0.625	0.03	0.685129	0.773288	0.772394	0.661449
0.658	0.034	0.666608	0.789523	0.789158	0.68032		0.608	0.037	0.687357	0.77178	0.770981	0.661183
0.675	0.034	0.659306	0.799326	0.799109	0.691078		0.623	0.036	0.690384	0.763751	0.763245	0.658018
0.661	0.034	0.665586	0.792406	0.792096	0.683573		0.598	0.028	0.674263	0.775772	0.775084	0.665341
0.675	0.034	0.667638	0.790277	0.78993	0.681213		0.605	0.035	0.684777	0.758073	0.75664	0.646158
0.673	0.034	0.660055	0.7897	0.789317	0.680151		0.619	0.033	0.695706	0.780696	0.780125	0.670481
0.673	0.034	0.665708	0.799725	0.799515	0.691565		0.631	0.033	0.676622	0.760912	0.759551	0.648703
0.673	0.034	0.660474	0.80039	0.800185	0.692217		0.615	0.032	0.689262	0.775373	0.774567	0.663846
0.661	0.035	0.660223	0.801588	0.801408	0.693828		0.629	0.037	0.691844	0.759714	0.75845	0.648438
0.656	0.035	0.658722	0.800124	0.79992	0.692024		0.603	0.031	0.682991	0.761267	0.760085	0.650156
0.658	0.035	0.665177	0.789345	0.788974	0.68007		0.62	0.063	0.684736	0.771691	0.770691	0.659335
0.675	0.034	0.666636	0.790765	0.790424	0.681706		0.624	0.028	0.676645	0.751553	0.750694	0.645168
0.66	0.035	0.659492	0.790232	0.78986	0.680743		0.614	0.066	0.693249	0.771203	0.770231	0.659207
0.678	0.034	0.660297	0.801721	0.801538	0.693867		0.632	0.035	0.694248	0.778256	0.777533	0.666879
0.677	0.034	0.66704	0.801144	0.800952	0.693143		0.62	0.034	0.69789	0.764771	0.76369	0.653503
0.672	0.034	0.65988	0.802564	0.802393	0.694873		0.625	0.063	0.687916	0.782692	0.782104	0.671808
0.672	0.034	0.660139	0.8011	0.800906	0.693063		0.601	0.032	0.686192	0.770937	0.770633	0.66652
0.677	0.034	0.666614	0.792583	0.792277	0.683773		0.603	0.029	0.683253	0.776659	0.775864	0.664927
0.657	0.035	0.659806	0.799681	0.799469	0.691485		0.607	0.063	0.672238	0.785841	0.785359	0.675635
0.657	0.035	0.660285	0.790853	0.790492	0.681409		0.625	0.028	0.674777	0.753371	0.75171	0.641412
0.674	0.034	0.665364	0.792184	0.791871	0.683324		0.629	0.028	0.687136	0.753105	0.751431	0.64115
0.66	0.034	0.660296	0.791785	0.791447	0.682556		0.642	0.032	0.704558	0.764017	0.762846	0.652285
0.66	0.034	0.667051	0.800302	0.800102	0.692285		0.606	0.033	0.703932	0.7842	0.783644	0.673369
0.658	0.035	0.666609	0.799991	0.799784	0.691842		0.632	0.03	0.688257	0.747294	0.746334	0.641139
0.675	0.034	0.667104	0.799193	0.798973	0.690897		0.649	0.033	0.693355	0.752528	0.751805	0.647046
0.673	0.034	0.659137	0.79041	0.790043	0.680967		0.608	0.036	0.674461	0.756121	0.754713	0.644866
0.656	0.035	0.667399	0.789878	0.7895	0.680374		0.647	0.031	0.677559	0.776393	0.775702	0.665791
0.674	0.034	0.65969	0.78939	0.78902	0.680119		0.634	0.032	0.677759	0.753371	0.752659	0.647796
0.657	0.034	0.660016	0.788902	0.788529	0.679681		0.598	0.029	0.702569	0.782425	0.781875	0.672061
0.674	0.034	0.666236	0.790809	0.790449	0.681412		0.605	0.034	0.675211	0.775461	0.774764	0.66501
0.677	0.034	0.666855	0.800124	0.799922	0.692081		0.601	0.029	0.691639	0.757009	0.755648	0.645815
0.658	0.034	0.659564	0.790366	0.790019	0.681286		0.633	0.03	0.684184	0.773243	0.772408	0.661948
0.675	0.034	0.667211	0.799237	0.799018	0.690948		0.637	0.036	0.676203	0.756964	0.755605	0.64579
0.673	0.034	0.665071	0.800701	0.800504	0.69266		0.599	0.035	0.673827	0.769606	0.769327	0.665859
0.672	0.034	0.667451	0.791208	0.790877	0.682229		0.635	0.031	0.688007	0.765836	0.764821	0.654813
0.673	0.034	0.665836	0.799414	0.799199	0.69118		0.619	0.036	0.673653	0.766368	0.765328	0.655016
0.656	0.034	0.658824	0.800967	0.800773	0.692967		0.609	0.036	0.69166	0.770005	0.769109	0.658941
0.659	0.034	0.667959	0.789434	0.789049	0.679907		0.604	0.034	0.687809	0.780917	0.780368	0.670917
0.671	0.034	0.660088	0.799902	0.799695	0.691769		0.61	0.034	0.692012	0.775639	0.774802	0.663757
0.662	0.035	0.667478	0.789345	0.788974	0.68007		0.644	0.029	0.692974	0.789523	0.789054	0.678685
0.676	0.034	0.666194	0.802165	0.80199	0.694438		0.631	0.032	0.683006	0.757009	0.755658	0.645875
0.658	0.035	0.667794	0.791785	0.791464	0.682875		0.644	0.034	0.692872	0.745032	0.743984	0.638809
0.66	0.036	0.667575	0.799681	0.799469	0.691485		0.629	0.034	0.676187	0.774397	0.773646	0.663647
0.66	0.035	0.657994	0.789922	0.789565	0.680764		0.644	0.03	0.685237	0.770981	0.770136	0.660141
0.66	0.034	0.666464	0.801544	0.801356	0.693604		0.624	0.03	0.689222	0.775994	0.775199	0.664432
0.674	0.034	0.667766	0.792539	0.792213	0.683375		0.629	0.059	0.683182	0.754436	0.752785	0.642249
0.672	0.034	0.660088	0.800035	0.799827	0.691837		0.634	0.03	0.670964	0.742903	0.741907	0.637532
0.658	0.034	0.668051	0.791785	0.79146	0.682795		0.645	0.061	0.676792	0.753371	0.751907	0.642499
0.674	0.034	0.658181	0.802431	0.802255	0.694632		0.629	0.031	0.69463	0.761089	0.759796	0.649272
0.663	0.035	0.658159	0.799281	0.799067	0.691083		0.621	0.036	0.680908	0.767521	0.766583	0.65671
0.659	0.034	0.658418	0.791962	0.791621	0.682648		0.599	0.031	0.690032	0.775373	0.774675	0.664939
0.658	0.034	0.659703	0.7897	0.789319	0.680177		0.614	0.034	0.700849	0.75998	0.758557	0.647624
0.661	0.035	0.667061	0.800302	0.800102	0.692285		0.589	0.031	0.686577	0.765436	0.764308	0.653651
0.657	0.036	0.666418	0.790232	0.789883	0.681137		0.594	0.029	0.676677	0.783978	0.783512	0.6744
0.672	0.034	0.659754	0.789434	0.789049	0.679907		0.603	0.031	0.666767	0.785708	0.785165	0.67471
0.659	0.035	0.660256	0.798793	0.798568	0.690439		0.629	0.028	0.675976	0.76211	0.760852	0.650263
0.658	0.034	0.66709	0.799592	0.799379	0.691384		0.599	0.031	0.679976	0.775151	0.774436	0.664587
0.658	0.034	0.65942	0.793027	0.792702	0.683789		0.594	0.061	0.685625	0.774131	0.773409	0.663736
0.661	0.035	0.659608	0.799681	0.799472	0.691542		0.605	0.035	0.679886	0.760247	0.758788	0.647607
0.657	0.035	0.660297	0.800656	0.800463	0.692723		0.598	0.035	0.673867	0.778921	0.778326	0.668809
0.657	0.034	0.666764	0.789656	0.789272	0.680101		0.596	0.027	0.685662	0.769207	0.768193	0.657358
0.6659	0.03431	0.663472	0.795638	0.795363	0.687001		0.62086	0.03792	0.683648	0.768953	0.768052	0.658544
0.00818352	0.000523355	0.00355765	0.00503458	0.00511325	0.00564379		0.018118	0.0118429	0.00836429	0.0111093	0.0113427	0.0106447

## Sheet: PSO
TPR	FPR	fitness	acc	F1	precision	左RF右DT	TPR	FPR	fitness	acc	F1	precision
0.66	0.029	0.788403	0.776082	0.77518	0.663488		0.645	0.03	0.790203	0.774308	0.773452	0.662564
0.618	0.029	0.796398	0.775461	0.77467	0.664055		0.633	0.029	0.786922	0.774929	0.774055	0.662873
0.653	0.039	0.771986	0.786595	0.786051	0.675376		0.632	0.03	0.796259	0.793648	0.793262	0.683204
0.641	0.027	0.80131	0.768896	0.767858	0.656928		0.653	0.03	0.795468	0.782337	0.781696	0.670912
0.639	0.028	0.793201	0.780562	0.779834	0.668577		0.632	0.028	0.783567	0.782559	0.781947	0.671419
0.652	0.029	0.799911	0.798394	0.798093	0.688485		0.664	0.03	0.805453	0.790011	0.789575	0.679558
0.632	0.028	0.800126	0.787482	0.786969	0.676471		0.643	0.03	0.791193	0.773421	0.772539	0.661656
0.654	0.034	0.805708	0.80008	0.799801	0.690288		0.637	0.03	0.799593	0.771425	0.770442	0.659282
0.62	0.03	0.805386	0.785176	0.784622	0.674156		0.657	0.029	0.789323	0.777413	0.776621	0.665538
0.599	0.025	0.793175	0.789966	0.789521	0.67938		0.655	0.03	0.799841	0.77351	0.772633	0.661772
0.643	0.029	0.80663	0.779986	0.779247	0.668034		0.614	0.03	0.794232	0.781317	0.780664	0.669985
0.64	0.028	0.810834	0.76761	0.766575	0.655993		0.628	0.029	0.780739	0.778966	0.778254	0.667541
0.641	0.031	0.787947	0.776615	0.775762	0.664346		0.656	0.029	0.792442	0.773687	0.772816	0.661958
0.693	0.028	0.774147	0.794846	0.794501	0.684865		0.66	0.029	0.79444	0.78105	0.780403	0.669844
0.634	0.025	0.797929	0.76415	0.762878	0.651685		0.65	0.03	0.781725	0.794358	0.79401	0.684425
0.644	0.029	0.797662	0.761533	0.760214	0.649431		0.631	0.028	0.795545	0.776748	0.775974	0.665207
0.635	0.029	0.792875	0.780651	0.779929	0.66872		0.634	0.029	0.787196	0.78003	0.779357	0.668774
0.601	0.029	0.815649	0.782248	0.781639	0.671207		0.656	0.03	0.794741	0.788724	0.788268	0.678242
0.658	0.026	0.796953	0.799681	0.79941	0.69014		0.663	0.03	0.787293	0.782115	0.781483	0.670844
0.636	0.028	0.791606	0.769163	0.768204	0.657775		0.631	0.028	0.781079	0.787438	0.78694	0.67665
0.642	0.029	0.786013	0.767654	0.766557	0.655539		0.627	0.029	0.792533	0.778389	0.777659	0.666903
0.609	0.028	0.782841	0.778788	0.777972	0.666338		0.63	0.029	0.80612	0.781228	0.780579	0.669962
0.626	0.027	0.792624	0.76415	0.762881	0.651706		0.653	0.03	0.803131	0.764594	0.763406	0.652599
0.611	0.03	0.794082	0.768542	0.767436	0.656148		0.619	0.029	0.790253	0.792495	0.792107	0.682263
0.638	0.034	0.806553	0.76557	0.764466	0.653937		0.647	0.03	0.787625	0.778078	0.7773	0.666173
0.646	0.033	0.82194	0.762908	0.761547	0.650179		0.642	0.028	0.794941	0.778833	0.778088	0.667091
0.648	0.034	0.775061	0.792539	0.792147	0.682233		0.632	0.03	0.803401	0.786639	0.786127	0.675827
0.656	0.029	0.793731	0.802165	0.801962	0.693692		0.612	0.029	0.798319	0.788813	0.788351	0.678237
0.649	0.03	0.79735	0.775461	0.77459	0.663295		0.628	0.031	0.786274	0.795245	0.79489	0.68499
0.611	0.03	0.808107	0.771336	0.77034	0.6591		0.634	0.03	0.797285	0.785619	0.785069	0.674538
0.627	0.029	0.793354	0.779764	0.779035	0.667964		0.66	0.029	0.785922	0.78003	0.779346	0.668654
0.621	0.029	0.78337	0.796176	0.795801	0.685362		0.623	0.03	0.788108	0.768453	0.767395	0.656448
0.642	0.03	0.805971	0.780607	0.77999	0.669851		0.656	0.03	0.806317	0.789611	0.78916	0.679014
0.638	0.035	0.79397	0.786773	0.786231	0.675544		0.648	0.029	0.783456	0.776348	0.775572	0.664877
0.635	0.029	0.791145	0.792362	0.79193	0.681457		0.649	0.028	0.805353	0.77382	0.772913	0.661734
0.628	0.029	0.786097	0.769961	0.768984	0.658228		0.631	0.03	0.800635	0.788813	0.788353	0.678263
0.63	0.029	0.802614	0.775062	0.774205	0.663128		0.649	0.03	0.788581	0.795023	0.794688	0.685172
0.667	0.034	0.808384	0.796354	0.796032	0.68648		0.633	0.029	0.802093	0.783224	0.782629	0.672138
0.633	0.028	0.799679	0.785397	0.784828	0.674123		0.622	0.03	0.782957	0.791918	0.791517	0.681595
0.637	0.029	0.794077	0.766057	0.764909	0.653966		0.635	0.031	0.794491	0.78278	0.782168	0.671585
0.634	0.03	0.797785	0.758251	0.756672	0.645437		0.639	0.03	0.781885	0.776526	0.775748	0.664995
0.625	0.031	0.797633	0.771647	0.770623	0.659112		0.638	0.03	0.799073	0.774175	0.773292	0.662219
0.647	0.031	0.796816	0.775905	0.774982	0.663165		0.661	0.028	0.788751	0.777546	0.776789	0.665983
0.647	0.027	0.784221	0.765348	0.764198	0.653432		0.657	0.03	0.786576	0.791341	0.790933	0.681033
0.664	0.029	0.806769	0.783889	0.783263	0.672268		0.634	0.031	0.793863	0.796576	0.796258	0.68673
0.624	0.03	0.783153	0.780474	0.779847	0.669635		0.615	0.03	0.790437	0.776393	0.775608	0.664831
0.656	0.029	0.802668	0.779099	0.778362	0.667374		0.647	0.03	0.792448	0.774131	0.773284	0.662515
0.624	0.027	0.783362	0.788059	0.787546	0.676924		0.644	0.029	0.805558	0.78176	0.781123	0.67051
0.63	0.029	0.787736	0.797906	0.797598	0.68796		0.642	0.028	0.783325	0.772445	0.771541	0.660726
0.602	0.027	0.806709	0.799725	0.799441	0.689885		0.641	0.031	0.796871	0.788769	0.788277	0.677779
0.651	0.029	0.798583	0.783845	0.783217	0.67222		0.65	0.03	0.803131	0.785131	0.784584	0.674207
0.66	0.03	0.793912	0.776482	0.775767	0.665603		0.643	0.03	0.799205	0.766856	0.765746	0.654849
0.626	0.026	0.799021	0.771647	0.770763	0.660296		0.632	0.03	0.793536	0.779941	0.779255	0.668559
0.628	0.026	0.794784	0.777502	0.776715	0.665655		0.626	0.031	0.802593	0.776038	0.775255	0.664572
0.628	0.041	0.781251	0.78522	0.78469	0.674504		0.619	0.03	0.783605	0.795245	0.794912	0.685394
0.626	0.029	0.802992	0.783401	0.782739	0.671473		0.645	0.029	0.80136	0.768497	0.767447	0.656537
0.618	0.027	0.79826	0.77005	0.769195	0.659345		0.662	0.029	0.788468	0.784111	0.783533	0.673025
0.649	0.027	0.817953	0.782381	0.781767	0.671252		0.646	0.029	0.786677	0.781849	0.781223	0.670703
0.659	0.03	0.792015	0.802475	0.802227	0.692855		0.636	0.03	0.795828	0.777945	0.777165	0.666055
0.635	0.026	0.787385	0.777945	0.777229	0.666714		0.661	0.031	0.788341	0.773199	0.772284	0.661198
0.618	0.025	0.810998	0.789079	0.788625	0.678556		0.632	0.03	0.793147	0.770094	0.769095	0.658145
0.609	0.028	0.796469	0.799414	0.799209	0.691405		0.644	0.028	0.797505	0.77799	0.777215	0.666149
0.659	0.028	0.789752	0.778966	0.77827	0.667707		0.648	0.03	0.800754	0.783046	0.782417	0.671579
0.616	0.031	0.802829	0.770405	0.769384	0.658201		0.653	0.029	0.785012	0.78939	0.788939	0.678847
0.643	0.03	0.804668	0.769917	0.768825	0.65728		0.622	0.028	0.79303	0.777324	0.776532	0.665467
0.647	0.027	0.805495	0.764461	0.763226	0.652168		0.618	0.03	0.78829	0.778566	0.777846	0.667139
0.63	0.038	0.795329	0.794092	0.793717	0.683753		0.659	0.028	0.792955	0.792495	0.792108	0.682289
0.631	0.027	0.813638	0.772001	0.77093	0.658991		0.634	0.031	0.783418	0.779276	0.778578	0.66792
0.639	0.028	0.7895	0.784998	0.784405	0.673516		0.655	0.03	0.790681	0.785797	0.785266	0.674932
0.602	0.028	0.800666	0.791696	0.791272	0.68106		0.651	0.03	0.794848	0.772445	0.771502	0.660388
0.646	0.03	0.786671	0.771957	0.770969	0.659634		0.628	0.03	0.804594	0.771159	0.770199	0.659272
0.646	0.029	0.786764	0.782115	0.781437	0.67031		0.62	0.029	0.783456	0.770715	0.76974	0.658811
0.634	0.029	0.796188	0.760158	0.758699	0.647539		0.652	0.03	0.787835	0.796309	0.795996	0.686593
0.666	0.028	0.800766	0.779454	0.778816	0.668732		0.665	0.03	0.800233	0.794979	0.794641	0.685095
0.616	0.032	0.807527	0.765392	0.764253	0.653542		0.653	0.03	0.794902	0.774352	0.773505	0.662679
0.664	0.037	0.785387	0.772756	0.771839	0.660847		0.651	0.031	0.795407	0.78797	0.787502	0.677489
0.638	0.027	0.802198	0.783845	0.783252	0.672638		0.659	0.03	0.782197	0.784244	0.783669	0.673169
0.653	0.027	0.823094	0.753859	0.752516	0.643577		0.625	0.029	0.784099	0.780651	0.779958	0.669031
0.603	0.026	0.793631	0.779897	0.779203	0.66844		0.618	0.03	0.787307	0.767166	0.766059	0.655103
0.644	0.03	0.795818	0.795334	0.79502	0.685818		0.648	0.029	0.794106	0.777014	0.776248	0.665489
0.633	0.03	0.790591	0.790898	0.790481	0.680541		0.642	0.03	0.795172	0.783978	0.783408	0.673029
0.661	0.029	0.79393	0.770981	0.77001	0.659043		0.652	0.03	0.788612	0.76934	0.768325	0.657452
0.646	0.027	0.789169	0.77453	0.7736	0.662068		0.655	0.03	0.800297	0.786906	0.786376	0.675815
0.606	0.03	0.795226	0.77901	0.778254	0.667114		0.622	0.03	0.785176	0.787127	0.786604	0.676057
0.627	0.028	0.817354	0.769384	0.768338	0.657234		0.633	0.031	0.794975	0.77901	0.7783	0.667588
0.61	0.027	0.797425	0.77626	0.77545	0.664482		0.661	0.029	0.800086	0.782559	0.781939	0.671322
0.635	0.027	0.792604	0.787216	0.786694	0.676154		0.636	0.03	0.781973	0.774308	0.773457	0.66261
0.642	0.029	0.796016	0.782425	0.781785	0.670983		0.648	0.03	0.786675	0.794225	0.793855	0.683928
0.655	0.03	0.786725	0.779941	0.779277	0.668799		0.63	0.03	0.799503	0.787704	0.787196	0.676713
0.63	0.028	0.795621	0.779542	0.778856	0.668252		0.626	0.029	0.792745	0.776127	0.775298	0.664202
0.651	0.029	0.800398	0.802209	0.801953	0.692466		0.624	0.029	0.782207	0.788769	0.788275	0.677753
0.66	0.027	0.808065	0.767433	0.766309	0.655182		0.628	0.03	0.785067	0.789567	0.78912	0.679043
0.624	0.029	0.787177	0.788103	0.78762	0.67738		0.655	0.029	0.787022	0.774707	0.773871	0.663053
0.591	0.027	0.805254	0.751952	0.750097	0.639391		0.631	0.03	0.805551	0.774574	0.773706	0.662661
0.648	0.033	0.809556	0.771824	0.770863	0.659764		0.63	0.03	0.792636	0.789168	0.78871	0.678577
0.628	0.029	0.80151	0.79764	0.797334	0.687796		0.632	0.028	0.782445	0.772134	0.771181	0.660064
0.642	0.029	0.813674	0.781317	0.780668	0.670033		0.646	0.029	0.794363	0.777945	0.777218	0.666596
0.632	0.028	0.78448	0.773998	0.773116	0.662101		0.65	0.03	0.783949	0.771247	0.770267	0.659164
0.639	0.03	0.800905	0.789123	0.788618	0.677861		0.666	0.03	0.788112	0.778788	0.778038	0.666997
0.63	0.03	0.796974	0.784333	0.783728	0.67287		0.627	0.03	0.790112	0.781405	0.780757	0.670105
0.63614	0.02927	0.797078	0.77972	0.778966	0.66836		0.64071	0.02961	0.79237	0.78107	0.780389	0.66981
0.0176929	0.00276353	0.00987079	0.0114914	0.0118134	0.0122694		0.0137443	0.000798686	0.00702058	0.00776049	0.00796949	0.00836408
