# Supplementary material for: Integration of simulated annealing into pigeon inspired optimizer algorithm for feature selection in network intrusion detection systems
Source: PeerJ journal article supplement (doi:10.7717/peerj-cs.2176), 2024-07-16
Supplement: code_and_data.zip [file UNSW-NB15.xlsx]

## Sheet: SABPIO
TPR	FPR	fitness	acc	F1	precision	left RF right DT	TPR	FPR	fitness	acc	F1	precision
0.92571	0.041	0.560932	0.925917	0.928339	0.856372		0.895	0.033	0.561121	0.91805	0.92005	0.81205
0.92331	0.0383194	0.561476	0.923466	0.926244	0.844276		0.895	0.033	0.561198	0.917986	0.919986	0.811986
0.91838	0.041	0.564938	0.9265	0.928837	0.859248		0.895	0.033	0.561181	0.918065	0.920065	0.812065
0.91245	0.041	0.563333	0.929879	0.931726	0.875924		0.895	0.033	0.561227	0.918152	0.920152	0.812152
0.93385	0.0372579	0.564292	0.923096	0.925927	0.842449		0.895	0.033	0.561073	0.917977	0.919977	0.811977
0.92367	0.0372581	0.563124	0.923096	0.925927	0.84245		0.895	0.033	0.56112	0.917977	0.919977	0.811977
0.91912	0.041	0.564187	0.930096	0.931911	0.876994		0.895	0.033	0.561108	0.918158	0.920158	0.812158
0.92255	0.041	0.562328	0.926962	0.929233	0.86153		0.895	0.033	0.561133	0.918077	0.920077	0.812077
0.91561	0.037	0.560102	0.922188	0.925151	0.837967		0.895	0.032	0.561135	0.917953	0.919953	0.811953
0.92301	0.041	0.563685	0.926094	0.92849	0.857246		0.895	0.033	0.561133	0.918054	0.920054	0.812054
0.91467	0.037	0.560385	0.922211	0.925171	0.838082		0.895	0.033	0.561316	0.917954	0.919954	0.811954
0.92042	0.037	0.560363	0.922202	0.925163	0.838038		0.895	0.033	0.561187	0.917953	0.919953	0.811953
0.93114	0.041	0.564375	0.924934	0.927498	0.851519		0.895	0.033	0.561061	0.918024	0.920024	0.812024
0.93136	0.037	0.563276	0.918	0.920386	0.831		0.895	0.033	0.561167	0.917809	0.919809	0.811809
0.93085	0.037	0.565754	0.918	0.921008	0.831		0.895	0.033	0.561221	0.917828	0.919828	0.811828
0.92238	0.037	0.563101	0.92183	0.924844	0.836198		0.895	0.033	0.561152	0.917944	0.919944	0.811944
0.93249	0.037	0.56144	0.92009	0.923358	0.831		0.895	0.033	0.561234	0.917899	0.919899	0.811899
0.91825	0.041	0.562584	0.925213	0.927737	0.852896		0.895	0.033	0.561246	0.918031	0.920031	0.812031
0.92385	0.037	0.562015	0.920495	0.923704	0.831		0.895	0.033	0.561231	0.917909	0.919909	0.811909
0.93217	0.037	0.562137	0.918549	0.922039	0.831		0.895	0.033	0.561089	0.917859	0.919859	0.811859
0.92473	0.041	0.562697	0.929657	0.931537	0.874831		0.895	0.033	0.561088	0.918147	0.920147	0.812147
0.92155	0.0373507	0.561113	0.923129	0.925955	0.842609		0.895	0.032	0.561146	0.917977	0.919977	0.811977
0.93271	0.0405975	0.560544	0.924261	0.926923	0.848196		0.895	0.033	0.561029	0.918007	0.920007	0.812007
0.92483	0.037	0.56413	0.9185	0.921998	0.831		0.895	0.033	0.561173	0.917858	0.919858	0.811858
0.91949	0.037	0.562405	0.921899	0.924904	0.83654		0.895	0.033	0.561155	0.917946	0.919946	0.811946
0.93036	0.041	0.565457	0.924428	0.927066	0.849023		0.895	0.032	0.561219	0.918011	0.920011	0.812011
0.92221	0.037	0.822677	0.919557	0.922902	0.831		0.895	0.033	0.561314	0.917885	0.919885	0.811885
0.91691	0.041	0.560803	0.92545	0.92794	0.854067		0.895	0.032	0.561055	0.918038	0.920038	0.812038
0.92024	0.037	0.564766	0.921682	0.924718	0.835468		0.895	0.033	0.561086	0.91794	0.91994	0.81194
0.91992	0.037	0.562457	0.922874	0.925737	0.841353		0.895	0.033	0.561237	0.917971	0.919971	0.811971
0.92012	0.037	0.566589	0.921677	0.924714	0.835447		0.895	0.033	0.561109	0.91794	0.91994	0.81194
0.92278	0.041	0.561636	0.93115	0.932813	0.88		0.895	0.033	0.561249	0.918185	0.920185	0.812185
0.92969	0.0397006	0.56097	0.923948	0.926655	0.846653		0.895	0.033	0.561168	0.917999	0.919999	0.811999
0.92612	0.037	0.56565	0.919917	0.92321	0.831		0.895	0.033	0.561214	0.917894	0.919894	0.811894
0.92899	0.041	0.563428	0.927175	0.929414	0.862579		0.895	0.033	0.561053	0.918082	0.920082	0.812082
0.91468	0.037	0.563301	0.919288	0.922671	0.831		0.895	0.033	0.561135	0.917878	0.919878	0.811878
0.92516	0.041	0.560772	0.924806	0.927389	0.850889		0.895	0.033	0.561119	0.918021	0.920021	0.812021
0.92873	0.037	0.560825	0.918	0.920233	0.831		0.895	0.033	0.561285	0.917804	0.919804	0.811804
0.92363	0.037	0.56069	0.918873	0.922317	0.831		0.895	0.033	0.561089	0.917867	0.919867	0.811867
0.92513	0.041	0.561878	0.92476	0.92735	0.85066		0.895	0.033	0.561085	0.91802	0.92002	0.81202
0.92607	0.041	0.560836	0.92685	0.929137	0.860978		0.895	0.033	0.561065	0.918074	0.920074	0.812074
0.92535	0.041	0.579613	0.924661	0.927266	0.850175		0.895	0.033	0.561116	0.918017	0.920017	0.812017
0.92242	0.0385698	0.560562	0.923554	0.926318	0.844707		0.895	0.033	0.56105	0.917988	0.919988	0.811988
0.92296	0.037	0.561768	0.922838	0.925706	0.841174		0.895	0.033	0.561111	0.91797	0.91997	0.81197
0.92399	0.037	0.561817	0.918293	0.921821	0.831		0.895	0.033	0.561331	0.917852	0.919852	0.811852
0.91941	0.037	0.560629	0.921221	0.924325	0.833197		0.895	0.033	0.561137	0.917928	0.919928	0.811928
0.92189	0.037	0.561547	0.922222	0.92518	0.838135		0.895	0.032	0.561214	0.917954	0.919954	0.811954
0.91915	0.041	0.56148	0.92808	0.930189	0.867048		0.895	0.033	0.561163	0.918106	0.920106	0.812106
0.92905	0.041	0.562234	0.925326	0.927834	0.853456		0.895	0.033	0.561114	0.918034	0.920034	0.812034
0.92357	0.037	0.56232	0.918	0.920882	0.831		0.895	0.033	0.561213	0.917824	0.919824	0.811824
0.92172	0.041	0.564563	0.925251	0.927769	0.853084		0.895	0.033	0.561103	0.918032	0.920032	0.812032
0.92109	0.037	0.561872	0.922514	0.925429	0.839574		0.895	0.033	0.561231	0.917961	0.919961	0.811961
0.91952	0.037	0.560521	0.921387	0.924466	0.834015		0.895	0.032	0.561192	0.917932	0.919932	0.811932
0.92766	0.041	0.561013	0.926361	0.928719	0.858562		0.895	0.033	0.5612	0.918061	0.920061	0.812061
0.92918	0.041	0.564397	0.92798	0.930102	0.866551		0.895	0.033	0.561204	0.918103	0.920103	0.812103
0.92277	0.041	0.564714	0.927595	0.929773	0.864651		0.895	0.033	0.561181	0.918093	0.920093	0.812093
0.92646	0.037	0.560505	0.920761	0.923931	0.831		0.895	0.033	0.561282	0.917916	0.919916	0.811916
0.92086	0.037	0.564555	0.922806	0.92568	0.84102		0.895	0.033	0.561328	0.917969	0.919969	0.811969
0.93151	0.041	0.561302	0.925279	0.927793	0.853221		0.895	0.033	0.561171	0.918033	0.920033	0.812033
0.91992	0.041	0.560915	0.927766	0.929919	0.865494		0.895	0.033	0.561049	0.918098	0.920098	0.812098
0.92101	0.037	0.561562	0.92215	0.925119	0.837782		0.895	0.033	0.561075	0.917952	0.919952	0.811952
0.92321	0.0377948	0.561718	0.923283	0.926087	0.843373		0.895	0.033	0.561166	0.917981	0.919981	0.811981
0.92807	0.037	0.560841	0.91973	0.923049	0.831		0.895	0.032	0.561172	0.917889	0.919889	0.811889
0.92629	0.037	0.564238	0.919383	0.922753	0.831		0.895	0.033	0.561217	0.91788	0.91988	0.81188
0.91612	0.041	0.563674	0.927136	0.929381	0.862389		0.895	0.033	0.56117	0.918081	0.920081	0.812081
0.92349	0.041	0.559997	0.929235	0.931176	0.872746		0.895	0.033	0.561237	0.918136	0.920136	0.812136
0.92841	0.0390528	0.56153	0.923722	0.926462	0.845538		0.895	0.033	0.561083	0.917993	0.919993	0.811993
0.92024	0.041	0.562019	0.927874	0.930012	0.866027		0.895	0.032	0.561167	0.9181	0.9201	0.8121
0.92165	0.041	0.561668	0.925396	0.927893	0.853799		0.895	0.033	0.561217	0.918036	0.920036	0.812036
0.93108	0.037	0.561588	0.92151	0.924571	0.83462		0.895	0.033	0.561316	0.917935	0.919935	0.811935
0.9209	0.041	0.560465	0.925395	0.927893	0.853795		0.895	0.032	0.56114	0.918036	0.920036	0.812036
0.92311	0.041	0.560434	0.929937	0.931776	0.87621		0.895	0.033	0.561254	0.918154	0.920154	0.812154
0.92285	0.0394534	0.560932	0.923862	0.926582	0.846228		0.895	0.033	0.561288	0.917996	0.919996	0.811996
0.92297	0.041	0.565172	0.93004	0.931863	0.876716		0.895	0.033	0.561035	0.918156	0.920156	0.812156
0.92944	0.037	0.56192	0.918	0.918055	0.831		0.895	0.033	0.561241	0.917738	0.919738	0.811738
0.92093	0.041	0.565451	0.927173	0.929412	0.862567		0.895	0.033	0.561202	0.918082	0.920082	0.812082
0.92129	0.0408136	0.565147	0.924336	0.926987	0.848568		0.895	0.033	0.561015	0.918009	0.920009	0.812009
0.92631	0.037	0.560368	0.922846	0.925713	0.841214		0.895	0.033	0.561134	0.91797	0.91997	0.81197
0.91942	0.0408658	0.566493	0.924354	0.927003	0.848658		0.895	0.032	0.561295	0.918009	0.920009	0.812009
0.92348	0.037	0.567573	0.918	0.920141	0.831		0.895	0.033	0.561106	0.917801	0.919801	0.811801
0.92788	0.0374182	0.564227	0.923152	0.925975	0.842725		0.895	0.032	0.561147	0.917978	0.919978	0.811978
0.92146	0.041	0.580848	0.925378	0.927878	0.853713		0.895	0.033	0.561275	0.918036	0.920036	0.812036
0.92365	0.041	0.559985	0.929705	0.931577	0.875064		0.895	0.033	0.5612	0.918148	0.920148	0.812148
0.92819	0.037	0.581758	0.921999	0.92499	0.837037		0.895	0.033	0.56123	0.917948	0.919948	0.811948
0.92725	0.037	0.561701	0.920879	0.924032	0.831508		0.895	0.033	0.561268	0.917919	0.919919	0.811919
0.92208	0.037	0.559846	0.922063	0.925044	0.837352		0.895	0.033	0.561151	0.91795	0.91995	0.81195
0.92713	0.041	0.561286	0.927533	0.929721	0.864348		0.895	0.033	0.561154	0.918092	0.920092	0.812092
0.92269	0.041	0.560975	0.925269	0.927785	0.853173		0.895	0.033	0.561187	0.918033	0.920033	0.812033
0.92298	0.037	0.560097	0.921955	0.924952	0.836818		0.895	0.033	0.561097	0.917947	0.919947	0.811947
0.92888	0.041	0.561098	0.925981	0.928394	0.856688		0.895	0.033	0.561054	0.918051	0.920051	0.812051
0.91888	0.0409246	0.582968	0.924375	0.92702	0.848759		0.895	0.033	0.561158	0.91801	0.92001	0.81201
0.92377	0.041	0.561558	0.927739	0.929897	0.865363		0.895	0.033	0.561214	0.918097	0.920097	0.812097
0.91878	0.037	0.561792	0.92129	0.924383	0.833536		0.895	0.033	0.561124	0.91793	0.91993	0.81193
0.92782	0.037	0.565643	0.922735	0.925619	0.840668		0.895	0.033	0.561154	0.917967	0.919967	0.811967
0.92323	0.037	0.568936	0.922486	0.925406	0.83944		0.895	0.033	0.56119	0.917961	0.919961	0.811961
0.92029	0.037	0.561671	0.918351	0.92187	0.831		0.895	0.032	0.561136	0.917854	0.919854	0.811854
0.92501	0.041	0.560651	0.925143	0.927677	0.852551		0.895	0.033	0.56106	0.91803	0.92003	0.81203
0.92868	0.041	0.586949	0.925008	0.927561	0.851883		0.895	0.033	0.561118	0.918026	0.920026	0.812026
0.92229	0.0399066	0.562155	0.92402	0.926717	0.847007		0.895	0.033	0.561188	0.918001	0.920001	0.812001
0.92679	0.0372531	0.563838	0.923094	0.925926	0.842441		0.895	0.033	0.561073	0.917977	0.919977	0.811977
0.923858	0.0389454	0.566046	0.923701	0.926357	0.847139		0.895	0.000324962	0.561165	0.91799	0.91999	0.81199
0.0043922	0.00191492	0.0262292	0.00328055	0.00298193	0.0137236		1.11022e-16	0.000324962	7.44584e-05	9.03616e-05	9.03616e-05	9.03616e-05
			all
traintime	testtime		traintime	testtime
0.265338	0.0782616		1.12701	0.0809348
0.265836	0.0775166		1.10915	0.0781336
0.272424	0.0781176		1.05099	0.078125
0.273787	0.077971		1.21923	0.0806534
0.273927	0.0773482		1.16236	0.0755301
0.27513	0.0780194		1.10481	0.0781851
0.275777	0.0707009		1.08231	0.0781195
0.277762	0.0613		1.18342	0.0781269
0.279044	0.0665417		1.28626	0.0961442
0.279641	0.0635552		1.25454	0.0781803
0.279871	0.0548306		1.2587	0.0747437
0.280232	0.0770335		1.17381	0.0780752
0.280478	0.0772173		1.1794	0.078054
0.280957	0.0781248		1.26594	0.0820465
0.281048	0.0624938		1.27317	0.0781305
0.281069	0.068785		1.19631	0.0780725
0.281173	0.0625629		1.20948	0.0781319
0.281244	0.0624974		1.30882	0.0781987
0.281676	0.0780621		1.19792	0.0743394
0.281712	0.0621636		1.13004	0.0827439
0.281764	0.0781174		1.17666	0.0782287
0.28214	0.0781167		1.1985	0.0780542
0.282519	0.0781491		1.24676	0.0781338
0.282825	0.0773933		1.19399	0.0781219
0.283773	0.0731359		1.23986	0.0782039
0.284022	0.061816		1.08322	0.062067
0.28494	0.0623116		1.13715	0.0817564
0.28574	0.0877466		1.22758	0.0781097
0.286161	0.0625806		1.29583	0.0781119
0.286356	0.0625041		1.18202	0.0936821
0.286706	0.0611703		1.19249	0.0859883
0.287068	0.0717483		1.22528	0.0785666
0.287816	0.0623057		1.15321	0.0937023
0.288039	0.0678604		1.25766	0.0781291
0.288109	0.0625026		1.10088	0.0780585
0.28859	0.0805609		1.06462	0.0781267
0.289257	0.0707533		1.19967	0.0781925
0.289568	0.0775337		1.2887	0.0937529
0.289822	0.0624535		1.1301	0.100851
0.29067	0.0687139		1.30034	0.0937347
0.291375	0.0781734		1.1901	0.0625052
0.291501	0.0716472		1.22442	0.0781686
0.292613	0.0564868		1.35156	0.0781045
0.292887	0.0727947		1.27256	0.0780582
0.293016	0.0627284		1.19318	0.0625138
0.293339	0.0778713		1.16788	0.0916097
0.293381	0.0665758		1.23056	0.0817568
0.293425	0.0779159		1.29504	0.0977998
0.293609	0.0707364		1.19297	0.0938153
0.293749	0.0626049		1.12182	0.0937505
0.293969	0.0639253		1.20501	0.0781832
0.29558	0.0736125		1.13969	0.0636654
0.295848	0.079417		1.17141	0.0698311
0.296095	0.0625582		1.16497	0.081331
0.29623	0.0633574		1.26635	0.0781248
0.296289	0.0625577		1.16684	0.0937502
0.296304	0.0808635		1.28189	0.0781193
0.296345	0.0625067		1.23883	0.0781224
0.296467	0.0648515		1.19154	0.0937536
0.296492	0.0625119		1.1874	0.0781736
0.296492	0.0713379		1.24169	0.0780649
0.296557	0.0738437		1.09763	0.0801394
0.29658	0.07798		1.21792	0.0781724
0.296602	0.0630276		1.106	0.0780537
0.296606	0.0671198		1.27182	0.0942302
0.296641	0.0625117		1.22378	0.0781293
0.296655	0.081588		1.25746	0.0937529
0.296661	0.0760682		1.30207	0.0781374
0.296695	0.0696421		1.16138	0.0734551
0.296737	0.0937619		1.19963	0.0797098
0.296802	0.0729735		1.27334	0.0779073
0.296833	0.083004		1.23151	0.0781949
0.296847	0.062573		1.13288	0.0780602
0.296885	0.0700791		1.14951	0.0937667
0.296977	0.0625107		1.21891	0.0862317
0.297019	0.0625749		1.11667	0.0936804
0.29702	0.0622759		1.24888	0.078125
0.297073	0.062233		1.25634	0.0803254
0.297085	0.0687938		1.13617	0.0718453
0.297109	0.0624955		1.28028	0.0938356
0.297255	0.062115		1.22163	0.0781188
0.297336	0.062516		1.17549	0.0938158
0.297338	0.0747457		1.20728	0.0781951
0.297649	0.0728273		1.16002	0.0664768
0.297759	0.077239		1.19887	0.0876474
0.297882	0.0620294		1.09766	0.0780568
0.297896	0.0621758		1.26232	0.0938215
0.299109	0.0625005		1.15286	0.0781386
0.299471	0.078037		1.23912	0.0713344
0.299906	0.0624075		1.33599	0.0781083
0.300126	0.0625117		1.17045	0.109371
0.300412	0.0600088		1.194	0.0780709
0.300529	0.0590644		1.08085	0.0781212
0.300636	0.0619876		1.29735	0.0687439
0.302483	0.0613973		1.16458	0.0848727
0.303014	0.0568748		1.1435	0.0781138
0.303818	0.0700035		1.35527	0.0937262
0.304171	0.0550978		1.2186	0.0781937
0.304373	0.055501		1.2075	0.0890334
0.304458	0.0624988		1.23912	0.0713344
0.29104	0.0688221		1.20169	0.0811649
0.00870157	0.00799064		0.0656271	0.00854509

## Sheet: CPIO
TPR	FPR	fitness	acc	F1	precision	左RF右DT	TPR	FPR	fitness	acc	F1	precision
0.893	0.032	0.557917	0.916226	0.908023	0.808397		0.894	0.034	0.557883	0.91691	0.908696	0.810349
0.914	0.063	0.559948	0.9266	0.917809	0.847845		0.894	0.034	0.557908	0.916882	0.908664	0.810326
0.932	0.082	0.55805	0.928374	0.919123	0.861773		0.894	0.034	0.557865	0.916996	0.90878	0.810606
0.94	0.117	0.557719	0.922859	0.913834	0.839271		0.894	0.034	0.557843	0.917025	0.908807	0.810695
0.943	0.115	0.562528	0.918832	0.910123	0.822493		0.894	0.034	0.557856	0.91699	0.908774	0.810594
0.916	0.065	0.559706	0.916169	0.90689	0.82272		0.894	0.034	0.557861	0.916893	0.908671	0.810415
0.916	0.064	0.558503	0.92356	0.914594	0.840629		0.894	0.034	0.557856	0.916876	0.908654	0.810369
0.891	0.032	0.562081	0.924752	0.915036	0.856443		0.894	0.034	0.557885	0.917007	0.908794	0.810602
0.917	0.08	0.561184	0.916591	0.907314	0.823905		0.894	0.034	0.557848	0.916888	0.908673	0.810301
0.914	0.062	0.561539	0.923406	0.914434	0.840222		0.894	0.034	0.557852	0.916905	0.908686	0.810402
0.895	0.037	0.562141	0.916893	0.908692	0.810127		0.894	0.034	0.557806	0.916973	0.908757	0.810539
0.946	0.108	0.558526	0.916585	0.908399	0.809112		0.894	0.034	0.55782	0.916985	0.908769	0.810572
0.917	0.072	0.558589	0.918114	0.907972	0.840591		0.894	0.034	0.557848	0.916973	0.90876	0.810501
0.888	0.033	0.563182	0.919363	0.910639	0.824217		0.894	0.034	0.557834	0.916945	0.908729	0.810459
0.917	0.07	0.55927	0.927159	0.915821	0.893053		0.894	0.034	0.557838	0.916916	0.908697	0.810426
0.892	0.036	0.560095	0.916791	0.908601	0.809695		0.894	0.034	0.557894	0.916899	0.90868	0.81039
0.935	0.095	0.564567	0.918661	0.909979	0.821616		0.894	0.034	0.557859	0.916956	0.908741	0.810484
0.919	0.063	0.559495	0.915393	0.907069	0.807831		0.894	0.034	0.557815	0.916899	0.908675	0.810455
0.893	0.036	0.560469	0.920475	0.911826	0.82639		0.894	0.034	0.557862	0.916893	0.908674	0.810378
0.893	0.037	0.561777	0.927832	0.918545	0.860412		0.894	0.034	0.557857	0.917013	0.9088	0.810614
0.903	0.051	0.557579	0.920446	0.911106	0.836381		0.894	0.034	0.557866	0.916933	0.908715	0.810472
0.891	0.032	0.562	0.914116	0.905771	0.804797		0.894	0.034	0.557887	0.916962	0.908748	0.810477
0.892	0.035	0.559174	0.920104	0.911642	0.822626		0.894	0.034	0.557891	0.916905	0.908688	0.810365
0.904	0.048	0.560705	0.921251	0.91177	0.841006		0.894	0.034	0.557779	0.916905	0.908684	0.81043
0.917	0.062	0.559942	0.917007	0.908803	0.810481		0.894	0.034	0.557839	0.916979	0.908765	0.810523
0.894	0.035	0.56606	0.915445	0.907149	0.80759		0.894	0.034	0.557841	0.916859	0.90864	0.810286
0.906	0.05	0.558514	0.922927	0.913607	0.844027		0.894	0.034	0.557846	0.916996	0.908781	0.810587
0.89	0.032	0.562151	0.920521	0.911847	0.826878		0.894	0.034	0.557927	0.917053	0.90884	0.810709
0.93	0.082	0.559369	0.918313	0.909641	0.820499		0.894	0.034	0.557871	0.916956	0.908739	0.810511
0.937	0.098	0.562236	0.916631	0.908426	0.809486		0.894	0.034	0.557854	0.917076	0.908863	0.810776
0.902	0.048	0.562574	0.919021	0.910375	0.822126		0.894	0.034	0.557855	0.91691	0.908692	0.810405
0.895	0.033	0.559788	0.921467	0.912142	0.839382		0.894	0.034	0.557844	0.916968	0.908755	0.81048
0.941	0.109	0.593705	0.91703	0.90815	0.819737		0.894	0.034	0.557867	0.916859	0.90864	0.810286
0.917	0.066	0.562567	0.924096	0.914133	0.858068		0.894	0.034	0.557871	0.916899	0.908681	0.810371
0.907	0.05	0.557979	0.916243	0.907946	0.8097		0.894	0.034	0.557893	0.916865	0.908641	0.810354
0.906	0.061	0.56282	0.921593	0.911963	0.844352		0.894	0.034	0.557879	0.916905	0.908688	0.810374
0.903	0.047	0.564066	0.916295	0.907976	0.810126		0.894	0.034	0.557862	0.916933	0.908714	0.810482
0.955	0.113	0.56054	0.916352	0.908166	0.808487		0.894	0.034	0.557866	0.917047	0.908832	0.810734
0.892	0.032	0.558819	0.916848	0.907974	0.819136		0.894	0.034	0.557857	0.916962	0.908748	0.810486
0.91	0.053	0.560407	0.918011	0.908915	0.825544		0.894	0.034	0.557887	0.916979	0.908761	0.810579
0.919	0.069	0.568794	0.918627	0.908895	0.836364		0.894	0.034	0.557839	0.91695	0.908729	0.810555
0.906	0.047	0.559211	0.915872	0.907682	0.80731		0.894	0.034	0.55784	0.916876	0.908657	0.810323
0.891	0.032	0.562184	0.914076	0.905711	0.80495		0.894	0.034	0.557825	0.916848	0.908624	0.810318
0.932	0.088	0.561037	0.91516	0.906838	0.80718		0.894	0.034	0.557858	0.916922	0.908706	0.810401
0.916	0.06	0.557945	0.928477	0.916368	0.912928		0.894	0.034	0.557874	0.916996	0.90878	0.810597
0.907	0.05	0.557833	0.918696	0.910014	0.821702		0.894	0.034	0.557869	0.916905	0.908688	0.810374
0.894	0.033	0.561025	0.918456	0.909793	0.820765		0.894	0.034	0.557858	0.916853	0.908635	0.810256
0.93	0.078	0.557956	0.920458	0.911925	0.824658		0.894	0.034	0.55789	0.916956	0.90874	0.810493
0.893	0.034	0.558487	0.920971	0.911837	0.834984		0.894	0.034	0.557891	0.916979	0.908762	0.810569
0.89	0.031	0.569447	0.918445	0.90937	0.826506		0.894	0.034	0.557899	0.916865	0.908645	0.810308
0.895	0.037	0.557932	0.925037	0.914866	0.864831		0.894	0.034	0.557854	0.916825	0.908599	0.810279
0.903	0.047	0.562701	0.922351	0.912958	0.84326		0.894	0.034	0.557857	0.916899	0.908677	0.810427
0.93	0.079	0.557478	0.916403	0.907121	0.823439		0.894	0.034	0.557838	0.916916	0.9087	0.810389
0.917	0.067	0.56285	0.921222	0.911337	0.846961		0.894	0.034	0.557851	0.916996	0.908783	0.810559
0.93	0.08	0.562636	0.920794	0.912204	0.82648		0.894	0.034	0.557895	0.917025	0.90881	0.810657
0.929	0.078	0.561378	0.916095	0.907905	0.80788		0.894	0.034	0.55784	0.916922	0.908705	0.810411
0.916	0.07	0.56618	0.916009	0.907824	0.807599		0.894	0.034	0.557883	0.916853	0.908632	0.810302
0.893	0.033	0.557487	0.915724	0.907472	0.80774		0.894	0.034	0.557885	0.916945	0.908727	0.810487
0.946	0.114	0.562901	0.926845	0.917081	0.864816		0.894	0.034	0.557835	0.916865	0.908645	0.810308
0.907	0.05	0.55908	0.925283	0.91542	0.860708		0.894	0.034	0.557858	0.917025	0.90881	0.810657
0.944	0.105	0.559911	0.916511	0.908296	0.809306		0.894	0.034	0.557864	0.916922	0.908706	0.810401
0.916	0.063	0.559977	0.921895	0.912478	0.842124		0.894	0.034	0.557839	0.916956	0.908734	0.810577
0.921	0.079	0.563499	0.917121	0.908944	0.810408		0.894	0.034	0.557868	0.916888	0.908667	0.810375
0.917	0.061	0.557813	0.918342	0.909012	0.829804		0.894	0.034	0.55787	0.916945	0.908722	0.810552
0.908	0.047	0.563429	0.919511	0.910885	0.823267		0.894	0.034	0.557859	0.916933	0.908716	0.810454
0.921	0.074	0.561599	0.920794	0.911624	0.834967		0.894	0.034	0.557833	0.916876	0.908655	0.810351
0.921	0.078	0.56037	0.918154	0.910078	0.811767		0.894	0.034	0.557887	0.916865	0.908643	0.810326
0.919	0.06	0.559706	0.926498	0.916678	0.864442		0.894	0.034	0.557846	0.917053	0.908837	0.810755
0.916	0.064	0.560229	0.914384	0.906009	0.805871		0.894	0.034	0.557865	0.916882	0.908663	0.810344
0.89	0.032	0.560605	0.921273	0.903108	0.985905		0.894	0.034	0.557899	0.916985	0.908767	0.8106
0.92	0.075	0.557149	0.921758	0.913336	0.826853		0.894	0.034	0.557861	0.916985	0.908769	0.810563
0.942	0.104	0.558579	0.920515	0.911854	0.826683		0.894	0.034	0.5579	0.916888	0.908668	0.810366
0.895	0.032	0.559924	0.918627	0.909944	0.82153		0.894	0.034	0.557864	0.916956	0.908738	0.810521
0.928	0.079	0.558951	0.917526	0.908698	0.820433		0.894	0.034	0.557837	0.916865	0.908643	0.810336
0.903	0.048	0.56821	0.918217	0.90953	0.820422		0.894	0.034	0.557844	0.916973	0.908759	0.810511
0.915	0.062	0.570455	0.917566	0.908701	0.821057		0.894	0.034	0.557887	0.916956	0.908736	0.810558
0.907	0.047	0.557014	0.916996	0.908837	0.809826		0.894	0.034	0.557871	0.916882	0.908666	0.810298
0.906	0.046	0.561825	0.922026	0.912519	0.843918		0.894	0.034	0.557854	0.916945	0.90873	0.81045
0.894	0.034	0.560751	0.921102	0.912563	0.826635		0.894	0.034	0.557894	0.916939	0.90872	0.810494
0.934	0.092	0.560425	0.929606	0.918176	0.905681		0.894	0.034	0.557856	0.916916	0.9087	0.810399
0.918	0.069	0.558895	0.917869	0.909186	0.819378		0.894	0.034	0.55785	0.917002	0.90879	0.810562
0.933	0.093	0.560268	0.922768	0.914322	0.830207		0.894	0.034	0.557856	0.916996	0.908784	0.81055
0.893	0.034	0.558503	0.921975	0.912415	0.844556		0.894	0.034	0.557868	0.916985	0.908769	0.810563
0.933	0.086	0.559231	0.920897	0.911119	0.844289		0.894	0.034	0.557833	0.916882	0.908665	0.810307
0.917	0.063	0.563069	0.918696	0.909589	0.827702		0.894	0.034	0.557896	0.916973	0.908757	0.810548
0.892	0.033	0.559019	0.921416	0.912888	0.827401		0.894	0.034	0.557854	0.91699	0.908779	0.810529
0.918	0.072	0.558136	0.916272	0.907362	0.818019		0.894	0.034	0.557892	0.916933	0.908713	0.810491
0.903	0.048	0.559306	0.9221	0.91362	0.828719		0.894	0.034	0.557837	0.916979	0.908763	0.810551
0.901	0.053	0.562273	0.921148	0.911477	0.843515		0.894	0.034	0.557893	0.916985	0.908769	0.810572
0.919	0.075	0.560211	0.927216	0.916673	0.879467		0.894	0.034	0.557927	0.916996	0.908778	0.810624
0.907	0.049	0.56232	0.921119	0.912563	0.826947		0.894	0.034	0.557836	0.916933	0.908717	0.810435
0.893	0.033	0.559628	0.924096	0.913572	0.867045		0.894	0.034	0.557876	0.916836	0.908609	0.810331
0.903	0.049	0.557681	0.923794	0.914018	0.85403		0.894	0.034	0.557849	0.916979	0.908765	0.810532
0.893	0.032	0.562939	0.922032	0.912749	0.840555		0.894	0.034	0.557836	0.916933	0.908717	0.810435
0.893	0.034	0.558871	0.917464	0.908715	0.819152		0.894	0.034	0.557873	0.916939	0.908718	0.810512
0.891	0.032	0.562017	0.914743	0.906437	0.805908		0.894	0.034	0.557866	0.916893	0.908678	0.810322
0.893	0.033	0.559184	0.922853	0.913896	0.838231		0.894	0.034	0.557834	0.917002	0.908788	0.810581
0.889	0.031	0.558827	0.916859	0.908712	0.809313		0.894	0.034	0.55784	0.916985	0.908765	0.810619
0.919	0.078	0.565045	0.915924	0.906613	0.822449		0.894	0.034	0.557846	0.916819	0.908597	0.810211
0.893	0.033	0.559628	0.924096	0.913572	0.867045		0.894	0.034	0.557906	0.916956	0.908737	0.810539
0.91125	0.05925	0.561083	0.919951	0.910856	0.832531		0.894	0.034	0.557862	0.916938	0.90872	0.810469
0.0166712	0.0238685	0.0042235	0.00364999	0.00323906	0.0265693		5.55112e-16	6.245e-17	2.48314e-05	5.54122e-05	5.76702e-05	0.00012139
traintime	testtime
0.279236	0.0646737
0.284589	0.0705051
0.265498	0.0621719
0.258929	0.0791483
0.268607	0.0677733
0.257159	0.0709093
0.249982	0.0645008
0.280882	0.0674767
0.265653	0.062571
0.265526	0.0624917
0.257654	0.0683396
0.347969	0.0899868
0.303755	0.0820055
0.307031	0.0802033
0.305052	0.0740006
0.290146	0.0690436
0.315529	0.0642607
0.283903	0.0625041
0.261806	0.0667071
0.261781	0.055007
0.266996	0.0611196
0.271952	0.05604
0.265375	0.0625045
0.265821	0.0777748
0.262993	0.0625014
0.288478	0.0649188
0.266385	0.0707262
0.260503	0.0521593
0.258441	0.072963
0.312002	0.0663102
0.297592	0.0709984
0.29346	0.0767984
0.270597	0.0625069
0.253958	0.0625002
0.272264	0.0560017
0.267509	0.0544553
0.279318	0.0574203
0.262692	0.0564847
0.265336	0.0625002
0.259295	0.0812678
0.25896	0.0616777
0.265872	0.0624917
0.256433	0.068794
0.269059	0.0674489
0.245634	0.0624557
0.249089	0.0625737
0.252462	0.0520539
0.259616	0.0524302
0.266501	0.0676403
0.262365	0.0540969
0.293995	0.0619869
0.256393	0.0790663
0.294361	0.0730097
0.26787	0.0609486
0.247588	0.0780547
0.27526	0.0527442
0.276513	0.0660989
0.303646	0.066622
0.319264	0.06059
0.265336	0.0864692
0.312304	0.0781281
0.271325	0.0625629
0.269764	0.0787153
0.301264	0.0768757
0.287771	0.0627124
0.274158	0.0608399
0.296484	0.0853648
0.280954	0.0781338
0.290416	0.0609789
0.293826	0.0782361
0.282583	0.0730751
0.281565	0.0757351
0.265745	0.0781255
0.269673	0.0781949
0.249963	0.0781107
0.2671	0.0610156
0.271958	0.056047
0.269963	0.0530605
0.265397	0.0625024
0.265385	0.062556
0.254385	0.0624874
0.252388	0.0756736
0.276973	0.067313
0.292746	0.0665717
0.250539	0.0779514
0.266532	0.0610273
0.250883	0.0615809
0.265482	0.0623996
0.279525	0.0624993
0.249571	0.0752206
0.249799	0.07902
0.266737	0.0673144
0.265927	0.0631423
0.296688	0.0625074
0.299296	0.0622001
0.250175	0.0750515
0.265807	0.0622439
0.281806	0.0622318
0.280704	0.0629797
0.273752	0.0670694
0.0187899	0.00851944

## Sheet: SPIO
TPR	FPR	fitness	acc	F1	precision	左RF右DT	TPR	FPR	fitness	acc	F1	precision
0.912	0.074	0.598243	0.924114	0.912393	0.886679		0.897	0.053	0.59937	0.913095	0.904015	0.811579
0.913	0.067	0.59891	0.915576	0.906623	0.816671		0.897	0.053	0.599154	0.912981	0.903858	0.811826
0.929	0.097	0.598225	0.912873	0.903969	0.808737		0.896	0.053	0.599302	0.912998	0.903862	0.812036
0.896	0.047	0.598294	0.918844	0.909481	0.831782		0.897	0.053	0.599121	0.912673	0.90354	0.811127
0.897	0.049	0.598416	0.913209	0.904326	0.809367		0.897	0.053	0.599185	0.91301	0.903911	0.811583
0.909	0.065	0.598019	0.925984	0.915622	0.871546		0.896	0.052	0.599223	0.912793	0.903685	0.811131
0.897	0.05	0.599923	0.911749	0.90284	0.805875		0.896	0.052	0.599132	0.912992	0.903866	0.811899
0.894	0.048	0.59933	0.913985	0.905095	0.811514		0.897	0.053	0.599318	0.91261	0.903479	0.810943
0.894	0.048	0.599237	0.914869	0.905353	0.822177		0.897	0.053	0.599072	0.91297	0.903874	0.811439
0.906	0.066	0.599723	0.915257	0.905805	0.822427		0.897	0.052	0.599159	0.913078	0.903962	0.812
0.894	0.048	0.597719	0.911886	0.902975	0.80626		0.896	0.052	0.599207	0.912627	0.903503	0.810895
0.905	0.064	0.598366	0.912508	0.903505	0.809029		0.896	0.052	0.599046	0.912958	0.903859	0.811462
0.896	0.049	0.598481	0.913768	0.90491	0.810516		0.897	0.053	0.59922	0.91273	0.903628	0.81089
0.897	0.049	0.598109	0.911789	0.902821	0.80672		0.896	0.053	0.59927	0.913146	0.904031	0.812177
0.901	0.055	0.598541	0.913483	0.904562	0.81057		0.898	0.053	0.599034	0.913198	0.904089	0.812222
0.894	0.046	0.598195	0.913226	0.90431	0.809836		0.897	0.053	0.599276	0.913124	0.904014	0.812042
0.892	0.046	0.598776	0.914401	0.905571	0.811847		0.896	0.053	0.599122	0.913049	0.903938	0.811861
0.895	0.05	0.598001	0.912034	0.903089	0.807068		0.896	0.052	0.59919	0.913369	0.904289	0.812318
0.914	0.074	0.59924	0.912878	0.903984	0.808637		0.897	0.052	0.599277	0.912496	0.903343	0.810914
0.911	0.062	0.597741	0.914572	0.905692	0.81297		0.896	0.053	0.599243	0.912958	0.903835	0.811767
0.906	0.064	0.59837	0.913209	0.904259	0.810224		0.896	0.053	0.599244	0.913329	0.904236	0.812375
0.914	0.067	0.598514	0.913409	0.904572	0.80929		0.897	0.053	0.598933	0.913243	0.904143	0.812236
0.924	0.084	0.598536	0.913181	0.904296	0.809306		0.896	0.052	0.599116	0.913226	0.904126	0.812189
0.908	0.066	0.598817	0.913774	0.904827	0.811683		0.896	0.053	0.598919	0.912376	0.90324	0.810379
0.895	0.048	0.597868	0.914264	0.905366	0.812368		0.897	0.053	0.599175	0.912924	0.903826	0.81135
0.905	0.065	0.598182	0.912274	0.903289	0.808198		0.897	0.053	0.599171	0.91224	0.903077	0.810347
0.897	0.049	0.601197	0.921832	0.910959	0.864176		0.896	0.052	0.599507	0.912519	0.903382	0.810764
0.893	0.048	0.600193	0.91419	0.905242	0.812817		0.897	0.053	0.599228	0.91289	0.903762	0.811637
0.897	0.05	0.598763	0.913249	0.904327	0.80997		0.896	0.052	0.599131	0.91273	0.903582	0.811471
0.91	0.069	0.598699	0.913289	0.904448	0.809033		0.896	0.053	0.59915	0.912559	0.903403	0.811117
0.909	0.068	0.603558	0.91362	0.904647	0.811606		0.897	0.053	0.599184	0.912234	0.903069	0.810363
0.895	0.048	0.598684	0.918074	0.908563	0.831536		0.897	0.053	0.599046	0.912952	0.903836	0.811669
0.895	0.047	0.598643	0.91358	0.904712	0.810147		0.897	0.053	0.599187	0.912696	0.903558	0.811253
0.895	0.047	0.598285	0.919055	0.909747	0.831638		0.896	0.053	0.599413	0.91277	0.903675	0.810901
0.894	0.044	0.599671	0.911897	0.902901	0.807352		0.897	0.053	0.599364	0.912599	0.903456	0.811061
0.896	0.048	0.599112	0.919927	0.910108	0.841749		0.897	0.052	0.599152	0.912707	0.903579	0.811164
0.909	0.064	0.598696	0.913352	0.904419	0.810381		0.897	0.053	0.599526	0.913221	0.904116	0.812234
0.911	0.064	0.599364	0.913859	0.905051	0.810119		0.897	0.052	0.599056	0.912781	0.903648	0.81142
0.895	0.047	0.599872	0.913551	0.903956	0.819477		0.897	0.052	0.598929	0.913163	0.904082	0.811785
0.894	0.049	0.599097	0.913283	0.904328	0.810478		0.896	0.053	0.599259	0.912821	0.903723	0.811088
0.912	0.065	0.598278	0.913278	0.9044	0.809477		0.896	0.053	0.599109	0.912895	0.90377	0.811621
0.912	0.065	0.599704	0.9137	0.90485	0.810227		0.897	0.053	0.59926	0.912901	0.90379	0.811462
0.895	0.047	0.598144	0.912086	0.90311	0.807588		0.897	0.053	0.598941	0.912719	0.903598	0.811093
0.906	0.063	0.60052	0.920315	0.910445	0.843759		0.897	0.053	0.599024	0.912684	0.903535	0.811362
0.909	0.059	0.598432	0.913922	0.905075	0.810782		0.897	0.053	0.59937	0.913203	0.904101	0.812158
0.896	0.048	0.598783	0.914019	0.905039	0.812769		0.897	0.052	0.599156	0.912433	0.903316	0.810294
0.899	0.049	0.598536	0.914846	0.905965	0.81371		0.897	0.053	0.599164	0.912947	0.903816	0.811828
0.894	0.047	0.597716	0.918165	0.907797	0.843979		0.897	0.053	0.599338	0.912861	0.903731	0.811594
0.896	0.049	0.59909	0.912325	0.903419	0.807338		0.897	0.052	0.599206	0.91289	0.903778	0.811437
0.911	0.068	0.598333	0.914698	0.905794	0.813607		0.897	0.053	0.599384	0.912781	0.903648	0.81142
0.897	0.05	0.598082	0.919465	0.910201	0.832262		0.897	0.053	0.599141	0.912827	0.903712	0.81131
0.906	0.064	0.600866	0.919585	0.910309	0.832793		0.896	0.052	0.599041	0.912479	0.903324	0.810886
0.908	0.065	0.598542	0.913414	0.90385	0.818691		0.897	0.053	0.599017	0.913306	0.904248	0.811867
0.896	0.049	0.598128	0.914002	0.905093	0.811798		0.896	0.053	0.599317	0.91289	0.90375	0.81179
0.895	0.047	0.597593	0.91188	0.902951	0.80647		0.896	0.053	0.599337	0.912645	0.903525	0.810875
0.894	0.047	0.600354	0.91366	0.904731	0.811142		0.897	0.052	0.599148	0.912913	0.903802	0.811487
0.895	0.049	0.598605	0.914144	0.904604	0.820431		0.897	0.052	0.599307	0.912645	0.903548	0.81059
0.905	0.064	0.59783	0.919095	0.909747	0.832321		0.897	0.052	0.599443	0.912399	0.903255	0.810542
0.898	0.048	0.602489	0.919226	0.909869	0.832859		0.897	0.053	0.59931	0.913238	0.904131	0.81231
0.893	0.047	0.598559	0.920407	0.910515	0.844375		0.897	0.053	0.599355	0.912576	0.90343	0.811031
0.895	0.048	0.60029	0.917909	0.908523	0.829286		0.897	0.053	0.599045	0.912719	0.903602	0.811046
0.91	0.067	0.598353	0.912702	0.903781	0.8085		0.897	0.052	0.599398	0.912776	0.903676	0.81098
0.894	0.047	0.600365	0.915034	0.905578	0.821854		0.897	0.052	0.599157	0.913198	0.904107	0.811993
0.898	0.049	0.597901	0.914099	0.905245	0.811353		0.896	0.053	0.599429	0.913643	0.904546	0.813271
0.897	0.05	0.598398	0.913614	0.904792	0.809647		0.897	0.053	0.599084	0.913118	0.90399	0.812249
0.942	0.11	0.600117	0.918986	0.909567	0.833012		0.897	0.053	0.599146	0.912804	0.903706	0.811032
0.921	0.09	0.598294	0.914435	0.905536	0.812844		0.897	0.052	0.599402	0.913386	0.904262	0.81293
0.898	0.046	0.600857	0.913032	0.904078	0.809804		0.897	0.053	0.599106	0.912759	0.903633	0.811256
0.894	0.048	0.598353	0.913414	0.904591	0.809134		0.897	0.052	0.599116	0.913215	0.904123	0.812059
0.905	0.072	0.600221	0.912901	0.903957	0.809333		0.896	0.053	0.599318	0.912884	0.903748	0.81173
0.895	0.048	0.597808	0.912719	0.903721	0.809532		0.897	0.053	0.599163	0.912559	0.903423	0.81086
0.896	0.047	0.598032	0.912856	0.903901	0.809338		0.897	0.053	0.599175	0.912724	0.9036	0.811153
0.899	0.051	0.59835	0.920213	0.91021	0.845375		0.897	0.053	0.599365	0.912827	0.903739	0.810968
0.897	0.049	0.601584	0.915947	0.906442	0.825133		0.897	0.053	0.599256	0.912673	0.903552	0.810975
0.896	0.05	0.598519	0.912696	0.903781	0.808413		0.897	0.053	0.599427	0.912941	0.903816	0.811749
0.98	0.209	0.598135	0.915833	0.906943	0.816525		0.896	0.053	0.599177	0.91265	0.903516	0.811087
0.894	0.049	0.599683	0.912348	0.903399	0.807937		0.897	0.053	0.598929	0.912913	0.903811	0.811363
0.896	0.047	0.603342	0.913038	0.904125	0.80929		0.897	0.052	0.59947	0.913215	0.904117	0.812126
0.896	0.05	0.59941	0.914783	0.905845	0.814293		0.897	0.053	0.599059	0.912548	0.903442	0.810446
0.91	0.066	0.59807	0.912707	0.903797	0.808381		0.897	0.053	0.599269	0.913135	0.904053	0.811713
0.893	0.048	0.598452	0.911652	0.902684	0.806362		0.897	0.052	0.599154	0.913067	0.90396	0.811841
0.91	0.07	0.598228	0.919819	0.910481	0.83441		0.897	0.053	0.599314	0.91253	0.903394	0.810789
0.895	0.049	0.598509	0.912901	0.904017	0.808564		0.896	0.052	0.599196	0.912719	0.903594	0.811141
0.894	0.048	0.598608	0.914515	0.904998	0.821176		0.896	0.053	0.59935	0.912582	0.903462	0.81071
0.896	0.049	0.601015	0.911709	0.902729	0.80666		0.897	0.052	0.599408	0.912958	0.903827	0.811872
0.895	0.051	0.598862	0.913876	0.904942	0.811801		0.897	0.053	0.599444	0.912998	0.903888	0.811711
0.896	0.05	0.600456	0.914327	0.905435	0.812456		0.897	0.053	0.599	0.912924	0.903819	0.811445
0.903	0.064	0.598355	0.915251	0.905794	0.822474		0.897	0.053	0.599186	0.913135	0.904025	0.812067
0.906	0.064	0.600153	0.91257	0.903561	0.809287		0.897	0.053	0.599228	0.912485	0.903357	0.810566
0.913	0.064	0.599165	0.919642	0.909145	0.85077		0.897	0.053	0.599172	0.913289	0.904167	0.812642
0.905	0.071	0.598255	0.912901	0.904033	0.808359		0.898	0.053	0.5991	0.913215	0.904093	0.812432
0.894	0.047	0.59754	0.914584	0.905685	0.813234		0.896	0.052	0.599132	0.913198	0.904108	0.811984
0.909	0.071	0.599396	0.920675	0.911435	0.835616		0.897	0.052	0.599248	0.912918	0.903831	0.811204
0.897	0.048	0.598566	0.913534	0.904571	0.811259		0.897	0.053	0.599096	0.91297	0.903877	0.811411
0.896	0.049	0.598485	0.917429	0.908007	0.828362		0.896	0.052	0.599375	0.91293	0.90381	0.811638
0.894	0.049	0.597979	0.914219	0.90531	0.812383		0.897	0.053	0.599232	0.912861	0.903726	0.811661
0.925	0.085	0.598557	0.912445	0.903497	0.808173		0.897	0.053	0.599347	0.912798	0.903679	0.811286
0.922	0.09	0.600794	0.919659	0.910325	0.833867		0.897	0.052	0.598985	0.912987	0.903852	0.811992
0.895	0.044	0.597482	0.917646	0.908176	0.829684		0.897	0.053	0.599293	0.913392	0.904288	0.812684
0.894	0.048	0.598608	0.914515	0.904998	0.821176		0.897	0.053	0.599202	0.912918	0.903789	0.811738
0.9025	0.05832	0.598977	0.914952	0.905783	0.818332		0.89674	0.05269	0.599209	0.912886	0.903769	0.811497
0.0121173	0.0197327	0.00116602	0.00295748	0.00260666	0.0147161		0.000482079	0.000462493	0.00013769	0.000270865	0.000284076	0.00059555
traintime	testtime
0.559036	0.0623589
0.558078	0.0781143
0.547139	0.083334
0.556816	0.073714
0.562629	0.0778141
0.521103	0.0686884
0.571301	0.0728595
0.53758	0.0664306
0.547148	0.0803647
0.563845	0.0630429
0.547357	0.0625029
0.559877	0.0669727
0.590707	0.0735388
0.526966	0.0694263
0.527121	0.0738127
0.551328	0.0635529
0.515839	0.0780382
0.514478	0.0636904
0.532956	0.0768299
0.519596	0.0785069
0.551625	0.0763941
0.547384	0.0782163
0.518189	0.0781276
0.500381	0.0779281
0.510938	0.0846565
0.513123	0.0781317
0.515794	0.0828347
0.523676	0.0700824
0.583956	0.0726786
0.521269	0.0779359
0.531142	0.0778394
0.572985	0.0806339
0.545814	0.0789201
0.516164	0.0783672
0.539248	0.0696332
0.518066	0.0601051
0.522927	0.0793402
0.550307	0.074609
0.56881	0.0783072
0.530744	0.0716586
0.50829	0.05914
0.563036	0.0778401
0.569902	0.0751123
0.51966	0.0780668
0.553449	0.078187
0.538693	0.0604668
0.53381	0.0695992
0.518961	0.0780077
0.581497	0.0824184
0.54411	0.0853481
0.545439	0.0663764
0.546112	0.0781689
0.525529	0.0707083
0.498327	0.078172
0.546496	0.0873606
0.560974	0.0760405
0.515252	0.0781732
0.542412	0.0678544
0.537326	0.0781224
0.569852	0.0625012
0.546703	0.0781295
0.584045	0.0779772
0.530664	0.0781379
0.521305	0.0768008
0.571645	0.0751603
0.516602	0.0781286
0.515661	0.0782011
0.535337	0.0666857
0.524102	0.07303
0.574689	0.0660121
0.534829	0.0839334
0.536005	0.0584686
0.532035	0.0819688
0.555997	0.0835066
0.508206	0.0696416
0.499858	0.0781302
0.526133	0.0813968
0.547599	0.0877955
0.556518	0.0624399
0.531585	0.0750654
0.563653	0.0717626
0.520856	0.0727267
0.521627	0.0672331
0.531099	0.0780995
0.576915	0.0780544
0.543436	0.0767443
0.560087	0.0747302
0.51473	0.0801535
0.513479	0.0858302
0.577932	0.0939462
0.55886	0.0937073
0.573697	0.074754
0.531211	0.0647361
0.546348	0.0822051
0.546939	0.0629742
0.586561	0.0690224
0.54637	0.0781147
0.587618	0.0752237
0.522854	0.0726783
0.541276	0.0748582
0.0225244	0.00727209

## Sheet: XGBoost
TPR	FPR	fitness	acc	F1	precision	左RF右DT	TPR	FPR	fitness	acc	F1	precision
0.925	0.106	0.624077	0.913534	0.904388	0.813611		0.893	0.061	0.624257	0.908749	0.89915	0.806542
0.919	0.077	0.619421	0.916848	0.908101	0.817414		0.894	0.062	0.624267	0.906839	0.89715	0.802671
0.896	0.05	0.625142	0.910677	0.901643	0.804658		0.894	0.062	0.623539	0.905995	0.896251	0.801165
0.911	0.119	0.619494	0.915068	0.905661	0.821297		0.89	0.062	0.624815	0.908641	0.899044	0.806222
0.925	0.082	0.630753	0.916545	0.907247	0.824066		0.894	0.062	0.623669	0.908264	0.898616	0.805867
0.896	0.047	0.62083	0.917703	0.90565	0.866773		0.894	0.062	0.62356	0.906297	0.89658	0.801628
0.908	0.061	0.626258	0.918627	0.908908	0.836191		0.893	0.062	0.62423	0.906879	0.897179	0.802904
0.898	0.05	0.619029	0.917937	0.908345	0.832266		0.893	0.062	0.623288	0.908093	0.898419	0.805731
0.912	0.07	0.620869	0.912741	0.903375	0.814286		0.894	0.062	0.624312	0.908019	0.89833	0.805711
0.894	0.051	0.620797	0.915867	0.906458	0.823605		0.891	0.061	0.623486	0.906565	0.896798	0.802878
0.906	0.064	0.618647	0.90928	0.900114	0.802694		0.89	0.061	0.623837	0.90831	0.898626	0.806407
0.909	0.059	0.619415	0.919386	0.909326	0.843511		0.895	0.061	0.623543	0.905761	0.896049	0.800216
0.907	0.069	0.620061	0.914373	0.903308	0.841391		0.894	0.061	0.623131	0.908053	0.898389	0.805504
0.898	0.054	0.630665	0.911396	0.901405	0.818484		0.89	0.063	0.623583	0.907785	0.898043	0.805738
0.907	0.076	0.618645	0.918576	0.90873	0.837833		0.894	0.06	0.623508	0.906063	0.896313	0.801412
0.89	0.046	0.621352	0.919237	0.908266	0.856362		0.892	0.062	0.623565	0.907768	0.898025	0.805701
0.903	0.062	0.627462	0.915234	0.905662	0.82397		0.892	0.061	0.624046	0.908629	0.899017	0.806385
0.908	0.066	0.624063	0.919705	0.909902	0.840805		0.894	0.061	0.623267	0.906559	0.896791	0.802884
0.896	0.05	0.619933	0.911224	0.902001	0.808421		0.894	0.061	0.623618	0.907962	0.898366	0.804467
0.912	0.077	0.635729	0.912975	0.903531	0.815925		0.894	0.059	0.623818	0.906046	0.896305	0.801265
0.913	0.072	0.627042	0.916756	0.904669	0.863806		0.893	0.061	0.623684	0.906873	0.897209	0.802467
0.95	0.136	0.619717	0.91849	0.908928	0.833525		0.894	0.062	0.623406	0.908413	0.898847	0.805261
0.906	0.058	0.617192	0.913106	0.904178	0.809672		0.891	0.06	0.624711	0.908407	0.898811	0.805604
0.894	0.051	0.623171	0.920002	0.908588	0.865727		0.894	0.06	0.623083	0.906702	0.89695	0.803061
0.912	0.064	0.621047	0.913215	0.904155	0.811639		0.895	0.061	0.623344	0.905744	0.895962	0.800967
0.926	0.095	0.623599	0.916808	0.907273	0.828076		0.894	0.061	0.623293	0.906656	0.896904	0.802944
0.894	0.046	0.621657	0.913563	0.904504	0.812569		0.891	0.061	0.623416	0.907597	0.897887	0.804863
0.892	0.047	0.621812	0.911504	0.902244	0.809621		0.894	0.062	0.623891	0.907649	0.897889	0.805582
0.929	0.096	0.620072	0.91593	0.906711	0.821227		0.895	0.062	0.624338	0.908339	0.898713	0.805784
0.888	0.052	0.626509	0.917652	0.908224	0.829102		0.893	0.06	0.623758	0.909148	0.899552	0.80754
0.907	0.058	0.618485	0.918747	0.909059	0.836116		0.891	0.062	0.62373	0.908287	0.898583	0.806593
0.894	0.051	0.618814	0.913534	0.904314	0.814577		0.894	0.061	0.623558	0.908036	0.898377	0.805401
0.895	0.05	0.618874	0.913551	0.903528	0.825061		0.894	0.061	0.62335	0.907649	0.897994	0.80434
0.898	0.059	0.622152	0.917954	0.908012	0.83725		0.894	0.062	0.623736	0.908738	0.899149	0.806385
0.896	0.047	0.623043	0.913928	0.903815	0.827337		0.893	0.061	0.623799	0.908475	0.898856	0.806071
0.932	0.105	0.619505	0.917253	0.908068	0.824559		0.894	0.062	0.623413	0.908071	0.898385	0.805803
0.9	0.054	0.619835	0.914065	0.904444	0.821267		0.891	0.062	0.623449	0.909	0.899394	0.807274
0.901	0.062	0.637969	0.916146	0.906837	0.823072		0.892	0.06	0.623651	0.908721	0.899088	0.806865
0.927	0.092	0.620274	0.914201	0.904961	0.816664		0.892	0.06	0.622924	0.908755	0.899161	0.806488
0.9	0.061	0.618095	0.913973	0.90476	0.81569		0.894	0.063	0.623201	0.908823	0.899245	0.806477
0.91	0.064	0.620242	0.917755	0.908301	0.829767		0.894	0.061	0.623177	0.905111	0.89529	0.799823
0.907	0.059	0.618886	0.912935	0.903929	0.810208		0.89	0.06	0.624351	0.906451	0.896771	0.801581
0.905	0.061	0.619565	0.915673	0.906133	0.824816		0.89	0.061	0.623149	0.906086	0.896344	0.801378
0.888	0.046	0.620992	0.914909	0.90587	0.815971		0.892	0.062	0.623402	0.906445	0.89676	0.801633
0.896	0.053	0.618649	0.915599	0.906288	0.821516		0.894	0.063	0.623315	0.90685	0.897144	0.802899
0.906	0.059	0.61846	0.910951	0.901488	0.810671		0.893	0.061	0.62487	0.908464	0.898789	0.806694
0.901	0.056	0.622262	0.910745	0.901486	0.807621		0.892	0.061	0.623631	0.906097	0.896324	0.801771
0.897	0.066	0.620267	0.915422	0.905708	0.826425		0.893	0.062	0.624098	0.908835	0.899175	0.807481
0.962	0.152	0.632533	0.912913	0.903834	0.811068		0.895	0.063	0.624548	0.907477	0.89776	0.804641
0.898	0.049	0.630557	0.921405	0.91195	0.841109		0.891	0.061	0.623374	0.907688	0.897989	0.804976
0.909	0.065	0.618451	0.916095	0.906103	0.832196		0.892	0.06	0.623559	0.906559	0.896828	0.802449
0.895	0.048	0.621196	0.919711	0.9071	0.882919		0.894	0.061	0.623523	0.906131	0.896377	0.801642
0.899	0.053	0.618703	0.913882	0.904478	0.817912		0.894	0.06	0.624556	0.907688	0.898029	0.804509
0.911	0.063	0.6195	0.916677	0.90694	0.830454		0.895	0.062	0.622696	0.905373	0.895553	0.800476
0.898	0.055	0.618652	0.910854	0.899196	0.838025		0.895	0.062	0.623283	0.905333	0.895532	0.800152
0.902	0.059	0.618955	0.912719	0.903777	0.808818		0.889	0.06	0.623458	0.908225	0.898533	0.806278
0.916	0.085	0.617955	0.914863	0.905031	0.826362		0.891	0.062	0.622785	0.908253	0.898594	0.805955
0.918	0.081	0.617856	0.913506	0.904498	0.811758		0.895	0.06	0.623355	0.90819	0.898512	0.806025
0.9	0.056	0.623213	0.910181	0.900821	0.807367		0.891	0.062	0.623122	0.907763	0.898121	0.804483
0.899	0.057	0.619794	0.917025	0.907817	0.824216		0.894	0.062	0.62328	0.907443	0.897698	0.804885
0.903	0.067	0.63097	0.910774	0.901813	0.804011		0.891	0.06	0.624387	0.908282	0.898609	0.806195
0.947	0.133	0.620373	0.913369	0.904277	0.812462		0.891	0.062	0.623893	0.907939	0.898242	0.805603
0.896	0.057	0.620517	0.914076	0.90502	0.813921		0.892	0.061	0.624261	0.907894	0.898187	0.805589
0.904	0.061	0.61974	0.919779	0.909844	0.842968		0.894	0.06	0.624409	0.906787	0.897105	0.802468
0.909	0.069	0.620452	0.916557	0.906824	0.830049		0.893	0.063	0.624458	0.908846	0.899254	0.806705
0.919	0.076	0.619991	0.909593	0.900673	0.800536		0.894	0.061	0.623396	0.906069	0.896303	0.801608
0.897	0.054	0.625142	0.916215	0.906819	0.824435		0.894	0.061	0.623671	0.906479	0.896771	0.801983
0.894	0.051	0.6277	0.920281	0.910373	0.844206		0.894	0.062	0.624698	0.906542	0.896831	0.802172
0.897	0.054	0.619386	0.914624	0.905349	0.818289		0.89	0.061	0.624162	0.908487	0.898856	0.806236
0.893	0.048	0.628728	0.910352	0.90146	0.802097		0.895	0.06	0.6228	0.908863	0.899254	0.806958
0.894	0.053	0.61848	0.918889	0.909321	0.834845		0.894	0.061	0.624765	0.908196	0.898527	0.805925
0.897	0.052	0.619885	0.913893	0.904346	0.819817		0.892	0.061	0.623533	0.908099	0.898401	0.806024
0.9	0.055	0.622199	0.916871	0.907803	0.821845		0.894	0.061	0.624227	0.905772	0.895972	0.801248
0.899	0.062	0.619545	0.91411	0.904977	0.81502		0.892	0.061	0.623426	0.907899	0.898268	0.804723
0.913	0.067	0.619166	0.912405	0.903436	0.80834		0.894	0.061	0.623242	0.908293	0.898596	0.806511
0.923	0.077	0.619089	0.921176	0.911559	0.842813		0.894	0.061	0.624791	0.906776	0.897006	0.803453
0.899	0.054	0.619895	0.917971	0.907986	0.837916		0.891	0.061	0.623675	0.908219	0.898624	0.805104
0.894	0.05	0.61878	0.92761	0.916555	0.890006		0.894	0.06	0.623649	0.908105	0.898416	0.805934
0.921	0.088	0.618979	0.913808	0.905025	0.809661		0.895	0.061	0.623232	0.907791	0.898139	0.804684
0.904	0.063	0.619677	0.913523	0.90454	0.811481		0.892	0.061	0.624306	0.908772	0.899109	0.807364
0.899	0.05	0.621376	0.913215	0.904101	0.812336		0.894	0.061	0.623299	0.906074	0.896322	0.801473
0.907	0.073	0.620816	0.91362	0.904773	0.809979		0.894	0.061	0.623337	0.907894	0.898175	0.805739
0.914	0.073	0.618165	0.914116	0.905126	0.813163		0.893	0.062	0.623294	0.906508	0.896772	0.802376
0.906	0.062	0.619158	0.917823	0.907921	0.836274		0.894	0.062	0.624299	0.908515	0.898925	0.80582
0.902	0.061	0.618323	0.912702	0.903429	0.81298		0.893	0.062	0.624264	0.906103	0.896327	0.801811
0.923	0.09	0.62553	0.915559	0.906814	0.813845		0.891	0.06	0.623794	0.908373	0.898756	0.805764
0.909	0.073	0.628908	0.914116	0.905018	0.814577		0.891	0.06	0.623884	0.906907	0.89723	0.802716
0.941	0.133	0.619349	0.915565	0.906062	0.823998		0.893	0.062	0.62393	0.906234	0.896509	0.801558
0.902	0.059	0.619659	0.916249	0.906139	0.834291		0.894	0.061	0.623943	0.905772	0.896037	0.800505
0.938	0.134	0.619992	0.914874	0.905194	0.824378		0.893	0.06	0.623572	0.906633	0.897001	0.801503
0.899	0.054	0.623462	0.914681	0.905345	0.819258		0.894	0.062	0.623199	0.906223	0.896523	0.80124
0.899	0.048	0.62098	0.920002	0.909513	0.851857		0.894	0.06	0.623657	0.906131	0.896426	0.801072
0.918	0.09	0.621643	0.913192	0.9038	0.815857		0.894	0.061	0.623478	0.906548	0.896837	0.802194
0.907	0.07	0.620579	0.916095	0.906362	0.828663		0.893	0.061	0.624782	0.908464	0.898812	0.806431
0.902	0.061	0.625262	0.914954	0.906145	0.813066		0.893	0.062	0.624564	0.907118	0.897401	0.803717
0.905	0.062	0.621083	0.915593	0.9067	0.815912		0.894	0.06	0.623642	0.908053	0.898346	0.806019
0.923	0.085	0.618837	0.912548	0.903395	0.811035		0.891	0.061	0.623194	0.906183	0.896472	0.801264
0.893	0.047	0.627147	0.916614	0.906929	0.829561		0.895	0.062	0.623454	0.90912	0.899528	0.807421
0.938	0.128	0.622415	0.911453	0.902411	0.806761		0.892	0.062	0.623815	0.906605	0.896848	0.802862
0.909	0.073	0.628908	0.914116	0.905018	0.814577		0.892	0.061	0.623095	0.904934	0.895132	0.799163
0.90728	0.06796	0.621885	0.915241	0.905682	0.824364		0.89298	0.06121	0.623721	0.907403	0.897714	0.804139
0.0139299	0.0225348	0.00408237	0.00302022	0.00276599	0.016422		0.0014831	0.000851998	0.000507982	0.00108021	0.00113019	0.00222939
traintime	testtime
0.771327	0.0816138
0.793192	0.0662394
0.738955	0.0864639
0.767645	0.0713351
0.762003	0.0943122
0.851644	0.0847878
0.729023	0.092258
0.759185	0.0774767
0.778767	0.0916674
0.787476	0.0766423
0.746486	0.0858998
0.838834	0.0657916
0.756739	0.0813532
0.768959	0.0684958
0.821818	0.0717115
0.761077	0.0780036
0.750392	0.0808496
0.805869	0.0813324
0.799229	0.0807946
0.762429	0.103998
0.773586	0.0802119
0.786556	0.074867
0.77505	0.0792418
0.777334	0.0867999
0.750037	0.0849237
0.778231	0.0864673
0.765485	0.0913541
0.827271	0.0795276
0.781824	0.095227
0.773085	0.0774922
0.786488	0.0904043
0.790915	0.0843785
0.774988	0.0748005
0.768227	0.0841248
0.735243	0.0799868
0.769529	0.0754085
0.861069	0.0884089
0.802082	0.0753813
0.761399	0.0709896
0.728985	0.070796
0.813579	0.0778186
0.771155	0.0846965
0.799796	0.0757186
0.825141	0.0824413
0.767332	0.0787129
0.732467	0.0675747
0.750886	0.0817409
0.814831	0.0801346
0.749644	0.0806518
0.804343	0.0754874
0.797546	0.0882387
0.755847	0.0798326
0.842973	0.0802021
0.829517	0.0770996
0.808068	0.0744388
0.759538	0.0783615
0.804645	0.0818725
0.784631	0.06598
0.791178	0.0755503
0.750521	0.0863669
0.811133	0.0801916
0.775428	0.0849888
0.76813	0.0630062
0.78891	0.0958729
0.783265	0.086659
0.743863	0.0893393
0.814321	0.0854285
0.787217	0.0832002
0.744181	0.0845304
0.791432	0.0779986
0.751451	0.0939314
0.775801	0.0799866
0.835826	0.0860565
0.765524	0.0790274
0.767699	0.0805025
0.807181	0.0860243
0.727857	0.0805843
0.770779	0.063648
0.80072	0.0789673
0.784044	0.0841148
0.762263	0.093765
0.785045	0.0803792
0.811066	0.0787182
0.796332	0.0860035
0.754083	0.0790553
0.762511	0.077271
0.762068	0.0810015
0.730793	0.0849488
0.774053	0.0814903
0.807185	0.0843501
0.741905	0.0778689
0.886217	0.0789213
0.832678	0.076154
0.748657	0.0838456
0.783057	0.0789721
0.749475	0.0814044
0.750822	0.0845275
0.797946	0.0730584
0.819042	0.0721681
0.781031	0.0808354
0.0310586	0.0071905

## Sheet: PSO
TPR	FPR	fitness	acc	F1	precision	左RF右DT	TPR	FPR	fitness	acc	F1	precision
0.871	0.034	0.621008	0.896795	0.888549	0.764523		0.86	0.034	0.626706	0.893727	0.883566	0.776613
0.864	0.027	0.622711	0.902898	0.89403	0.783993		0.869	0.061	0.631156	0.896619	0.88772	0.770603
0.872	0.038	0.621593	0.89347	0.885149	0.75866		0.871	0.061	0.624854	0.89351	0.884661	0.763713
0.86	0.037	0.625341	0.899653	0.891309	0.771379		0.869	0.06	0.625625	0.893294	0.883236	0.774676
0.859	0.028	0.625943	0.900924	0.892096	0.779161		0.861	0.034	0.625474	0.896174	0.887223	0.770177
0.878	0.035	0.623905	0.902322	0.89351	0.782085		0.859	0.035	0.625283	0.894052	0.883924	0.777015
0.885	0.046	0.623295	0.908059	0.899002	0.798348		0.865	0.038	0.626925	0.892809	0.883896	0.762899
0.856	0.027	0.62076	0.898079	0.889523	0.770246		0.871	0.062	0.63093	0.894457	0.885582	0.765892
0.858	0.028	0.622478	0.909827	0.898313	0.833027		0.871	0.061	0.631724	0.892233	0.882225	0.771912
0.856	0.026	0.627207	0.910164	0.90159	0.797745		0.86	0.034	0.626532	0.894212	0.885369	0.76508
0.914	0.093	0.620966	0.902288	0.893952	0.776898		0.863	0.037	0.62622	0.892866	0.88395	0.763037
0.869	0.032	0.622626	0.902601	0.89412	0.779147		0.862	0.036	0.625381	0.892507	0.882386	0.773555
0.866	0.031	0.622164	0.89866	0.889861	0.773943		0.86	0.034	0.631191	0.89371	0.88481	0.764599
0.866	0.024	0.62053	0.899299	0.890822	0.772002		0.871	0.062	0.631386	0.89355	0.884647	0.764311
0.879	0.039	0.623061	0.905681	0.896892	0.789532		0.86	0.036	0.626509	0.893932	0.885078	0.764624
0.921	0.111	0.622768	0.900999	0.892314	0.777805		0.859	0.036	0.626207	0.892866	0.882832	0.773523
0.86	0.025	0.620556	0.89509	0.886747	0.762059		0.862	0.035	0.626723	0.892946	0.88405	0.76301
0.853	0.029	0.620439	0.897508	0.888826	0.770319		0.86	0.035	0.631516	0.890647	0.880507	0.76974
0.889	0.091	0.624643	0.895889	0.887461	0.764473		0.859	0.035	0.625052	0.895284	0.88648	0.766902
0.862	0.027	0.621366	0.898609	0.890214	0.769724		0.858	0.036	0.625665	0.895564	0.886625	0.768785
0.864	0.025	0.624629	0.90685	0.89691	0.805624		0.859	0.034	0.63175	0.895615	0.886661	0.769038
0.896	0.073	0.620995	0.901552	0.892518	0.782726		0.86	0.034	0.631067	0.894748	0.884648	0.778288
0.877	0.06	0.621852	0.905094	0.896086	0.790614		0.859	0.036	0.626195	0.893459	0.884572	0.763966
0.867	0.031	0.622265	0.898598	0.889966	0.772098		0.86	0.036	0.632256	0.893259	0.884417	0.763142
0.854	0.031	0.627035	0.906896	0.89797	0.79398		0.875	0.063	0.625954	0.892894	0.884035	0.762571
0.867	0.032	0.621451	0.901506	0.892875	0.778353		0.863	0.036	0.625023	0.893716	0.884896	0.763848
0.85	0.036	0.619686	0.916591	0.907197	0.825505		0.861	0.037	0.630809	0.893921	0.885105	0.764236
0.869	0.028	0.622795	0.898968	0.890348	0.772775		0.86	0.036	0.62485	0.893083	0.883037	0.774101
0.875	0.034	0.631679	0.899117	0.890502	0.773022		0.861	0.036	0.624683	0.893134	0.88427	0.76309
0.859	0.03	0.622772	0.89979	0.890961	0.776671		0.857	0.034	0.625989	0.89351	0.883488	0.774818
0.864	0.027	0.62172	0.89521	0.886104	0.769674		0.86	0.035	0.625622	0.892336	0.882256	0.772795
0.857	0.027	0.625595	0.896767	0.888175	0.767879		0.862	0.035	0.624788	0.892467	0.882393	0.773033
0.841	0.025	0.622196	0.900252	0.891615	0.775686		0.869	0.062	0.625733	0.89124	0.881145	0.770589
0.872	0.05	0.627305	0.918929	0.909602	0.831527		0.862	0.034	0.626264	0.893738	0.884811	0.764916
0.882	0.057	0.621485	0.897257	0.888537	0.770175		0.874	0.063	0.626086	0.89602	0.887117	0.769387
0.854	0.021	0.634006	0.898016	0.888585	0.778942		0.861	0.035	0.625966	0.893134	0.884264	0.76315
0.871	0.039	0.620766	0.906092	0.897466	0.788628		0.863	0.036	0.625964	0.892005	0.883147	0.760772
0.857	0.023	0.621684	0.899801	0.891288	0.773433		0.859	0.034	0.631542	0.892438	0.882372	0.772896
0.864	0.025	0.629243	0.836935	0.829236	0.666898		0.862	0.035	0.626113	0.891628	0.881591	0.770889
0.879	0.039	0.624091	0.904831	0.895918	0.788943		0.869	0.06	0.631316	0.892438	0.882356	0.773048
0.852	0.02	0.632507	0.907306	0.895684	0.826786		0.859	0.036	0.625654	0.890505	0.880428	0.76886
0.87	0.036	0.621907	0.90117	0.892568	0.777303		0.866	0.037	0.626175	0.89091	0.880761	0.77037
0.845	0.021	0.622118	0.879463	0.870523	0.737938		0.86	0.036	0.631528	0.89371	0.884816	0.764547
0.859	0.036	0.623743	0.899151	0.890557	0.772886		0.86	0.034	0.631627	0.895449	0.8865	0.768658
0.861	0.023	0.625511	0.898883	0.890383	0.771357		0.861	0.035	0.625775	0.892495	0.883598	0.762122
0.873	0.035	0.626934	0.898119	0.889375	0.772221		0.862	0.037	0.630921	0.894668	0.885837	0.765894
0.871	0.038	0.621289	0.89318	0.884468	0.761757		0.862	0.035	0.630213	0.893733	0.884836	0.764613
0.872	0.038	0.621611	0.892969	0.884374	0.760236		0.872	0.062	0.632116	0.893573	0.884676	0.764295
0.888	0.044	0.625339	0.89943	0.890989	0.771914		0.861	0.036	0.626481	0.894628	0.885759	0.766181
0.853	0.03	0.620803	0.89943	0.890876	0.773075		0.871	0.06	0.625554	0.893784	0.884866	0.76492
0.856	0.024	0.624168	0.906496	0.897701	0.791526		0.872	0.062	0.626266	0.893328	0.884418	0.763919
0.862	0.024	0.625823	0.901797	0.893114	0.779543		0.863	0.035	0.625358	0.892267	0.883394	0.761434
0.868	0.03	0.62233	0.897075	0.888519	0.768155		0.86	0.035	0.626146	0.893431	0.884629	0.763101
0.868	0.033	0.622758	0.903268	0.894432	0.784495		0.871	0.061	0.631207	0.891514	0.881464	0.770758
0.86	0.028	0.630496	0.908527	0.89932	0.801288		0.862	0.037	0.632215	0.895723	0.886789	0.769077
0.874	0.045	0.626416	0.904306	0.895878	0.782348		0.862	0.036	0.630735	0.894685	0.885849	0.76598
0.864	0.028	0.623079	0.897309	0.888492	0.771238		0.865	0.037	0.625586	0.895119	0.886331	0.766405
0.839	0.023	0.622289	0.904877	0.896118	0.787321		0.872	0.062	0.631284	0.89444	0.885563	0.765875
0.871	0.033	0.623553	0.899362	0.889828	0.783005		0.858	0.034	0.631713	0.89517	0.886276	0.767534
0.874	0.039	0.622194	0.897668	0.889182	0.768684		0.874	0.063	0.63152	0.893619	0.884772	0.76391
0.845	0.021	0.621825	0.894885	0.886173	0.765194		0.86	0.036	0.625516	0.894674	0.885802	0.766298
0.864	0.031	0.622183	0.891908	0.883607	0.755444		0.861	0.035	0.625497	0.892387	0.882302	0.772962
0.866	0.036	0.62257	0.893351	0.883326	0.774491		0.864	0.036	0.625302	0.89172	0.882806	0.760721
0.868	0.033	0.622245	0.895866	0.887303	0.765748		0.861	0.035	0.626468	0.895267	0.885207	0.779058
0.866	0.03	0.620404	0.904198	0.895739	0.782443		0.859	0.034	0.625475	0.891959	0.881803	0.772695
0.896	0.063	0.622073	0.897691	0.889135	0.769436		0.875	0.062	0.62529	0.894206	0.885342	0.765272
0.865	0.03	0.62406	0.897491	0.888956	0.768811		0.864	0.038	0.626298	0.894195	0.884019	0.777788
0.877	0.046	0.621522	0.897742	0.889195	0.769457		0.86	0.035	0.632507	0.893567	0.884759	0.763441
0.859	0.027	0.622938	0.875927	0.867477	0.728108		0.868	0.037	0.626164	0.896733	0.887831	0.770877
0.876	0.041	0.626325	0.896157	0.887611	0.766171		0.866	0.037	0.625277	0.893738	0.884887	0.764197
0.883	0.05	0.621923	0.900514	0.891978	0.775196		0.869	0.061	0.632021	0.895455	0.885381	0.779614
0.858	0.026	0.629936	0.897246	0.888521	0.770192		0.87	0.063	0.626064	0.893927	0.885076	0.764576
0.889	0.06	0.634667	0.901552	0.892712	0.780669		0.862	0.037	0.624216	0.893117	0.884233	0.763244
0.859	0.024	0.621577	0.893813	0.88505	0.76351		0.87	0.061	0.631521	0.893442	0.884562	0.763866
0.862	0.028	0.62139	0.898084	0.889843	0.767084		0.869	0.06	0.624378	0.893516	0.884636	0.764022
0.863	0.03	0.621308	0.903	0.893008	0.79649		0.862	0.036	0.625923	0.89302	0.884144	0.762979
0.878	0.043	0.624256	0.90381	0.89528	0.78236		0.873	0.061	0.631626	0.894725	0.885906	0.765897
0.899	0.078	0.622431	0.899761	0.891018	0.775725		0.871	0.061	0.625675	0.892147	0.883275	0.761194
0.854	0.026	0.622464	0.900018	0.891592	0.772996		0.86	0.036	0.624911	0.894086	0.885224	0.765007
0.882	0.042	0.620437	0.900885	0.892289	0.776619		0.86	0.035	0.630961	0.892529	0.882446	0.773254
0.869	0.027	0.633564	0.899419	0.890876	0.772929		0.868	0.059	0.624976	0.895963	0.88714	0.768488
0.878	0.038	0.620882	0.903565	0.893713	0.796337		0.868	0.059	0.626184	0.893465	0.884614	0.763634
0.876	0.039	0.623739	0.906354	0.896801	0.799876		0.871	0.062	0.631715	0.891896	0.881813	0.77189
0.863	0.026	0.622052	0.891891	0.883462	0.756587		0.871	0.061	0.626261	0.896043	0.887251	0.768351
0.862	0.027	0.621246	0.877108	0.868615	0.730417		0.866	0.037	0.630835	0.892621	0.882534	0.773484
0.868	0.033	0.630526	0.900257	0.891748	0.774369		0.862	0.034	0.631822	0.894565	0.885689	0.766121
0.877	0.041	0.619622	0.898061	0.889658	0.768675		0.867	0.038	0.625656	0.892946	0.884017	0.763322
0.892	0.074	0.62111	0.910055	0.89866	0.832224		0.871	0.061	0.62541	0.892906	0.88408	0.762282
0.86	0.029	0.624192	0.900075	0.891144	0.778353		0.874	0.064	0.624693	0.89391	0.885092	0.764222
0.854	0.029	0.62156	0.898871	0.89013	0.773797		0.875	0.063	0.626632	0.895307	0.886433	0.767628
0.876	0.036	0.6224	0.902909	0.894009	0.784372		0.865	0.037	0.625326	0.896379	0.887467	0.770233
0.871	0.055	0.625689	0.892393	0.883899	0.758162		0.86	0.036	0.626487	0.891606	0.881547	0.771034
0.854	0.023	0.621502	0.896351	0.886885	0.775627		0.865	0.036	0.626768	0.896185	0.887289	0.769667
0.931	0.128	0.622604	0.897639	0.889048	0.769681		0.865	0.038	0.625944	0.892535	0.882506	0.77276
0.888	0.054	0.623442	0.904056	0.895319	0.785185		0.859	0.036	0.625012	0.892244	0.88217	0.772558
0.859	0.029	0.621895	0.895221	0.88664	0.764621		0.861	0.036	0.625858	0.8929	0.882813	0.774099
0.871	0.029	0.631859	0.897052	0.887949	0.773546		0.87	0.062	0.62499	0.892963	0.882954	0.773491
0.871	0.036	0.623288	0.906257	0.897524	0.790243		0.872	0.061	0.631802	0.894605	0.885733	0.766167
0.842	0.02	0.626082	0.905761	0.896534	0.794685		0.862	0.036	0.631663	0.893362	0.884486	0.763671
0.899	0.078	0.622431	0.899761	0.891018	0.775725		0.869	0.061	0.625897	0.895096	0.886284	0.766588
0.86907	0.03785	0.623677	0.899246	0.89042	0.776629		0.86464	0.04416	0.627621	0.893644	0.884385	0.767843
0.0154824	0.0187874	0.00327061	0.00883503	0.00860806	0.0206262		0.00506067	0.0121702	0.00275501	0.00136399	0.00171662	0.00462727
traintime	testtime
0.711744	0.0694289
0.702176	0.0942709
0.736947	0.0995135
0.711263	0.0644674
0.773023	0.0780108
0.714552	0.0783598
0.726544	0.079957
0.785858	0.0809128
0.704329	0.0809507
0.721461	0.0839231
0.725816	0.0727429
0.806825	0.0779991
0.71657	0.0692589
0.703324	0.0701735
0.687681	0.0947099
0.693224	0.0809202
0.713699	0.0913064
0.742266	0.0841084
0.671383	0.0756216
0.740282	0.0748677
0.714768	0.0798116
0.749176	0.0779762
0.66545	0.0831196
0.662556	0.077733
0.736678	0.0814376
0.726771	0.0788281
0.776445	0.0794878
0.718798	0.0782146
0.674797	0.0824566
0.731226	0.0827122
0.729811	0.0950363
0.753812	0.0861452
0.722326	0.078814
0.749311	0.0904171
0.778304	0.0824008
0.733258	0.0818596
0.729225	0.0893564
0.733181	0.0657096
0.735492	0.0918553
0.796809	0.0907192
0.700255	0.08814
0.724871	0.0851214
0.686644	0.0799901
0.710364	0.0890644
0.693239	0.0866265
0.733177	0.074275
0.706569	0.0766277
0.722208	0.0795565
0.700882	0.0687964
0.786114	0.0949204
0.726304	0.0766261
0.691183	0.0907276
0.721431	0.0646498
0.74647	0.0940435
0.717718	0.0711963
0.729282	0.0803082
0.711842	0.0998688
0.713959	0.0878143
0.695331	0.0941689
0.716822	0.0815971
0.767346	0.0709076
0.67422	0.0732815
0.686772	0.100073
0.800547	0.0742836
0.72035	0.0802755
0.668858	0.0827191
0.742571	0.0796618
0.744712	0.0871353
0.736465	0.062145
0.694822	0.0903804
0.751813	0.0929832
0.743528	0.089035
0.74119	0.0775318
0.736252	0.0933721
0.728011	0.0774553
0.770078	0.0758438
0.695694	0.0853481
0.8738	0.0765519
0.818851	0.0914795
0.828811	0.0932143
0.984036	0.110308
0.876183	0.0927477
0.871801	0.0849938
0.817827	0.0898688
0.811613	0.079015
0.744148	0.0849042
0.734835	0.0788414
0.739461	0.080404
0.749832	0.0720711
0.682171	0.0794818
0.687204	0.0837286
0.859591	0.0932748
0.799929	0.0774045
0.734594	0.0843863
0.7604	0.0836492
0.732324	0.0857034
0.787114	0.0812297
0.817377	0.0957863
0.716624	0.0836892
0.740137	0.0827766
0.0516962	0.0086598

## Sheet: ARM
TPR	FPR	fitness	acc	F1	precision	左RF右DT	TPR	FPR	fitness	acc	F1	precision
0.876	0.099	0.609391	0.901649	0.887597	0.837911		0.867	0.104	0.612454	0.894748	0.879948	0.824913
0.911	0.138	0.623206	0.855305	0.843787	0.713505		0.909	0.147	0.615168	0.867264	0.852893	0.753548
0.886	0.105	0.609475	0.886233	0.874224	0.776642		0.919	0.152	0.611609	0.858778	0.847058	0.720601
0.875	0.105	0.618197	0.858014	0.8464	0.718654		0.827	0.088	0.613407	0.890436	0.875611	0.812794
0.921	0.144	0.619305	0.884459	0.871982	0.776629		0.824	0.083	0.622003	0.853543	0.842189	0.709653
0.833	0.087	0.610911	0.902972	0.88901	0.841088		0.827	0.089	0.612571	0.896447	0.881556	0.830975
0.911	0.141	0.607238	0.87193	0.85763	0.762999		0.877	0.104	0.614498	0.890505	0.875651	0.813259
0.871	0.098	0.607371	0.898535	0.884308	0.830225		0.823	0.085	0.613277	0.857683	0.846191	0.717372
0.873	0.127	0.61995	0.872471	0.858453	0.762145		0.873	0.101	0.612575	0.876566	0.863905	0.760838
0.88	0.101	0.609483	0.894007	0.879232	0.822471		0.919	0.15	0.611082	0.890305	0.875428	0.812923
0.872	0.096	0.608999	0.863033	0.851429	0.727353		0.868	0.105	0.619893	0.873327	0.858845	0.767407
0.832	0.086	0.620167	0.870703	0.856406	0.76033		0.878	0.135	0.614731	0.873464	0.858924	0.76814
0.867	0.131	0.619189	0.885902	0.873404	0.780118		0.828	0.089	0.612144	0.85758	0.846087	0.717204
0.834	0.087	0.609497	0.885515	0.873082	0.77866		0.909	0.147	0.620519	0.891497	0.876422	0.818207
0.913	0.142	0.608963	0.898757	0.884794	0.828039		0.919	0.151	0.619521	0.869146	0.854617	0.758614
0.839	0.084	0.618363	0.872574	0.858546	0.762441		0.834	0.088	0.611127	0.894885	0.880207	0.824066
0.834	0.088	0.609358	0.884385	0.872219	0.773828		0.877	0.104	0.62007	0.853081	0.841643	0.709356
0.832	0.086	0.619888	0.860364	0.848895	0.721831		0.824	0.085	0.615235	0.877262	0.864595	0.762353
0.828	0.086	0.608944	0.895467	0.880963	0.823985		0.874	0.131	0.619903	0.859269	0.84752	0.721622
0.882	0.096	0.619705	0.886136	0.873916	0.77825		0.866	0.13	0.612224	0.892535	0.877594	0.819872
0.871	0.13	0.616702	0.855801	0.844485	0.713181		0.919	0.152	0.612619	0.859782	0.848125	0.721963
0.839	0.087	0.621549	0.901694	0.887418	0.840618		0.835	0.089	0.612102	0.854814	0.84318	0.71334
0.873	0.131	0.608	0.901808	0.887592	0.840291		0.908	0.148	0.61213	0.880866	0.868407	0.768486
0.832	0.083	0.60891	0.858208	0.846682	0.718463		0.878	0.135	0.612279	0.896419	0.881612	0.830002
0.912	0.14	0.622998	0.898506	0.883891	0.834349		0.828	0.088	0.623576	0.876127	0.863728	0.757938
0.918	0.143	0.609599	0.859873	0.848221	0.722095		0.824	0.084	0.621486	0.873315	0.858759	0.767934
0.879	0.103	0.607008	0.899767	0.885805	0.831073		0.87	0.133	0.614618	0.891817	0.876785	0.818689
0.916	0.141	0.621631	0.85908	0.847438	0.720661		0.915	0.147	0.612144	0.880541	0.868143	0.767286
0.912	0.142	0.621372	0.855556	0.844146	0.713306		0.867	0.129	0.620998	0.858675	0.846936	0.720536
0.92	0.144	0.619874	0.897514	0.882895	0.831329		0.915	0.147	0.621508	0.85867	0.847204	0.718899
0.919	0.146	0.609186	0.859559	0.847866	0.721797		0.915	0.147	0.611771	0.868468	0.853923	0.757268
0.918	0.142	0.608928	0.87145	0.857138	0.762053		0.912	0.151	0.611806	0.853868	0.842471	0.710428
0.917	0.144	0.609719	0.872466	0.858152	0.764275		0.908	0.147	0.611441	0.894999	0.880282	0.824799
0.873	0.128	0.619635	0.897491	0.883056	0.829298		0.877	0.106	0.623406	0.89533	0.880677	0.82512
0.866	0.13	0.606742	0.859075	0.847666	0.719253		0.87	0.134	0.611226	0.867709	0.853387	0.754145
0.914	0.144	0.623346	0.902367	0.888323	0.840101		0.876	0.105	0.619742	0.894948	0.880222	0.824738
0.872	0.127	0.611063	0.863278	0.851827	0.72683		0.827	0.087	0.623436	0.877028	0.864456	0.761131
0.872	0.131	0.608808	0.862816	0.851189	0.727115		0.866	0.1	0.622776	0.880986	0.868659	0.767676
0.919	0.148	0.621738	0.857837	0.84624	0.718249		0.831	0.086	0.613815	0.891874	0.876806	0.819214
0.885	0.102	0.611525	0.885965	0.873537	0.779659		0.874	0.13	0.611834	0.852927	0.841487	0.709114
0.919	0.148	0.62197	0.87161	0.857253	0.762717		0.916	0.149	0.612461	0.852938	0.841519	0.709024
0.879	0.132	0.622593	0.884767	0.872484	0.775681		0.878	0.135	0.611844	0.877319	0.864705	0.762063
0.911	0.141	0.611856	0.885874	0.873625	0.777894		0.87	0.134	0.622226	0.852995	0.841632	0.708804
0.881	0.104	0.609697	0.88686	0.87464	0.779909		0.876	0.105	0.621371	0.891725	0.876705	0.818321
0.84	0.088	0.609907	0.858345	0.846826	0.718656		0.827	0.087	0.620275	0.876401	0.863757	0.760353
0.878	0.128	0.611248	0.85616	0.844742	0.714365		0.827	0.089	0.621243	0.88033	0.867856	0.767432
0.884	0.101	0.60811	0.886689	0.874404	0.780084		0.826	0.089	0.619791	0.868451	0.853892	0.757329
0.92	0.148	0.609555	0.893892	0.879095	0.822376		0.828	0.089	0.623933	0.894999	0.88025	0.825136
0.878	0.101	0.609897	0.872009	0.857697	0.763266		0.92	0.152	0.61097	0.895655	0.881004	0.826069
0.872	0.095	0.607212	0.859616	0.848235	0.72002		0.911	0.149	0.619814	0.872312	0.858052	0.763545
0.839	0.087	0.621923	0.881528	0.869386	0.767353		0.831	0.086	0.620424	0.859154	0.847408	0.721411
0.914	0.145	0.620105	0.8854	0.87334	0.775201		0.87	0.134	0.613299	0.875859	0.863432	0.757589
0.835	0.088	0.609549	0.885566	0.873077	0.779263		0.87	0.133	0.612708	0.868627	0.854156	0.757101
0.918	0.143	0.617758	0.862611	0.850935	0.727059		0.908	0.146	0.620261	0.859069	0.847337	0.721177
0.832	0.086	0.62136	0.875739	0.861515	0.770896		0.867	0.131	0.623113	0.881072	0.868657	0.768572
0.879	0.1	0.610594	0.856069	0.844747	0.713659		0.872	0.103	0.621216	0.896676	0.881862	0.83085
0.879	0.1	0.608646	0.887305	0.87509	0.780895		0.909	0.147	0.623354	0.85336	0.841993	0.709426
0.886	0.101	0.61094	0.88556	0.873331	0.777012		0.87	0.134	0.614943	0.854769	0.843204	0.712873
0.921	0.147	0.609406	0.898233	0.884038	0.828965		0.874	0.101	0.611486	0.85352	0.842095	0.710009
0.919	0.145	0.611018	0.894029	0.879433	0.820736		0.868	0.132	0.613508	0.875756	0.863356	0.757174
0.921	0.148	0.610053	0.868194	0.853952	0.75461		0.907	0.147	0.619527	0.894697	0.879925	0.82447
0.826	0.084	0.619212	0.88414	0.871991	0.773143		0.827	0.089	0.621989	0.859867	0.848184	0.722273
0.918	0.146	0.618477	0.876007	0.861957	0.770177		0.877	0.106	0.61384	0.889895	0.874985	0.812088
0.827	0.083	0.621127	0.903143	0.889035	0.843333		0.916	0.149	0.614386	0.858493	0.84706	0.718403
0.874	0.104	0.609625	0.884186	0.872069	0.77297		0.912	0.15	0.612795	0.881197	0.868832	0.768445
0.838	0.088	0.606972	0.85932	0.847732	0.720745		0.909	0.147	0.614869	0.87246	0.858209	0.763807
0.877	0.1	0.610598	0.889387	0.877198	0.785535		0.916	0.148	0.623224	0.880792	0.868345	0.768227
0.828	0.087	0.618775	0.870606	0.856314	0.760087		0.824	0.085	0.611586	0.875933	0.863519	0.757644
0.883	0.099	0.611061	0.886541	0.874245	0.779839		0.824	0.084	0.614898	0.880444	0.867977	0.767626
0.835	0.087	0.610087	0.867766	0.853506	0.753845		0.908	0.147	0.610985	0.873521	0.859035	0.767871
0.88	0.098	0.60718	0.862679	0.851197	0.725968		0.869	0.105	0.619604	0.876053	0.863559	0.758498
0.918	0.148	0.608895	0.855225	0.843712	0.713342		0.911	0.15	0.623543	0.880547	0.868196	0.766915
0.88	0.101	0.619246	0.881739	0.869618	0.767638		0.831	0.085	0.622631	0.871987	0.857682	0.76316
0.911	0.142	0.619602	0.897257	0.882826	0.82855		0.87	0.134	0.62143	0.859246	0.847584	0.721062
0.923	0.139	0.617606	0.854866	0.843282	0.713144		0.835	0.088	0.623518	0.873544	0.859012	0.76826
0.833	0.086	0.621073	0.898426	0.884147	0.830466		0.834	0.088	0.623327	0.877587	0.864938	0.762903
0.839	0.088	0.608363	0.856337	0.844977	0.714327		0.909	0.146	0.610946	0.882001	0.869633	0.770227
0.872	0.131	0.619739	0.897189	0.882733	0.828606		0.831	0.084	0.620527	0.858099	0.846622	0.71799
0.925	0.146	0.618245	0.889952	0.877783	0.786687		0.873	0.101	0.622581	0.87603	0.863556	0.758296
0.924	0.146	0.617071	0.872061	0.857806	0.762961		0.834	0.089	0.621595	0.87218	0.857835	0.763882
0.88	0.099	0.608989	0.893967	0.879195	0.822327		0.869	0.104	0.62369	0.892336	0.877347	0.819764
0.917	0.139	0.621249	0.897189	0.882594	0.830091		0.909	0.147	0.622799	0.867766	0.853515	0.753782
0.883	0.099	0.618968	0.873201	0.859153	0.763949		0.865	0.101	0.623219	0.858077	0.846527	0.718378
0.917	0.141	0.621502	0.896887	0.882393	0.828096		0.874	0.131	0.619627	0.8766	0.864193	0.75898
0.88	0.1	0.623174	0.855048	0.843477	0.713379		0.828	0.088	0.611437	0.859519	0.847847	0.721601
0.917	0.142	0.60827	0.862171	0.850468	0.72645		0.919	0.151	0.614269	0.871833	0.857508	0.762969
0.833	0.083	0.619452	0.885372	0.873245	0.775708		0.831	0.086	0.621222	0.891486	0.876493	0.81737
0.874	0.129	0.619211	0.875443	0.861215	0.770253		0.877	0.134	0.621348	0.881596	0.868991	0.771274
0.877	0.1	0.608698	0.858487	0.847049	0.718424		0.877	0.135	0.612045	0.853451	0.842121	0.709374
0.827	0.086	0.610065	0.897411	0.882776	0.831196		0.835	0.089	0.613449	0.895307	0.880622	0.825389
0.885	0.1	0.621979	0.889233	0.877175	0.783982		0.865	0.101	0.62345	0.872745	0.858498	0.764407
0.911	0.143	0.611394	0.860392	0.848946	0.721745		0.832	0.085	0.614983	0.89574	0.880813	0.829199
0.872	0.101	0.616924	0.872985	0.858725	0.765019		0.869	0.104	0.613459	0.852984	0.841617	0.708808
0.868	0.13	0.607325	0.871057	0.856811	0.760725		0.915	0.147	0.619899	0.882133	0.869507	0.772627
0.925	0.148	0.6092	0.875511	0.86127	0.770511		0.907	0.146	0.619521	0.891725	0.876703	0.818343
0.918	0.139	0.609041	0.888263	0.876132	0.782373		0.832	0.086	0.611743	0.877581	0.864994	0.76242
0.835	0.087	0.611027	0.871325	0.857085	0.761259		0.864	0.101	0.613556	0.89144	0.87635	0.818187
0.877	0.1	0.620542	0.901518	0.887279	0.839623		0.872	0.102	0.614576	0.877479	0.864875	0.762323
0.879	0.129	0.608917	0.863261	0.851777	0.727005		0.865	0.102	0.612571	0.872163	0.857804	0.763946
0.925	0.148	0.6092	0.875511	0.86127	0.770511		0.911	0.15	0.613732	0.895273	0.880588	0.825281
0.88113	0.11635	0.614074	0.878356	0.865379	0.771357		0.87108	0.1175	0.616954	0.875203	0.861966	0.766132
0.0318505	0.0239718	0.00557101	0.0154195	0.0146684	0.0415552		0.0326814	0.0257004	0.00456513	0.0140356	0.0129928	0.0394869
traintime	testtime
0.810364	0.0785074
0.792767	0.0498648
0.77528	0.0856726
0.751001	0.0755401
0.779091	0.0806422
0.813841	0.0811903
0.752534	0.0763702
0.843853	0.0808811
0.794742	0.0960634
0.748243	0.0773849
0.703665	0.0807993
0.770551	0.0823834
0.800629	0.0995083
0.806864	0.0818231
0.827297	0.0781825
0.797969	0.0847635
0.764411	0.0712552
0.752098	0.0713508
0.807911	0.0846546
0.727199	0.0688272
0.798033	0.0755649
0.839795	0.072376
0.801493	0.0730517
0.834055	0.0859785
0.762955	0.075845
0.74443	0.0687103
0.751544	0.072125
0.749774	0.091615
0.811633	0.0754988
0.733387	0.0661612
0.74043	0.0740328
0.75181	0.0865023
0.724198	0.0825853
0.745801	0.0911629
0.82978	0.0861382
0.732278	0.0764194
0.790769	0.0785766
0.787998	0.0795016
0.772758	0.0635996
0.739922	0.0688951
0.769946	0.0833831
0.768618	0.0686402
0.792465	0.0847421
0.774494	0.0760529
0.794272	0.0809388
0.801998	0.0805447
0.772191	0.0702982
0.746587	0.0859373
0.716824	0.0675583
0.803845	0.0709407
0.822032	0.0667202
0.822995	0.0725298
0.797427	0.0790975
0.815494	0.0775127
0.760008	0.0846896
0.728998	0.0770526
0.81745	0.066771
0.765349	0.080508
0.803726	0.0751891
0.83047	0.0809314
0.786512	0.0813646
0.807094	0.0733325
0.696862	0.0920441
0.7641	0.0798018
0.774877	0.0744953
0.763231	0.0665998
0.81095	0.0770326
0.804592	0.0849645
0.728493	0.0874527
0.81073	0.0793521
0.774878	0.0810709
0.773017	0.0782053
0.794515	0.0796087
0.756171	0.082655
0.838817	0.0748746
0.78383	0.0947518
0.728252	0.0690124
0.754958	0.0716558
0.778766	0.0809898
0.784807	0.0897424
0.759729	0.065043
0.789129	0.0819247
0.777192	0.0683885
0.76239	0.05948
0.783968	0.0665686
0.752115	0.0844152
0.74855	0.0857029
0.721567	0.0866606
0.747653	0.0804789
0.721667	0.0779963
0.750923	0.0746431
0.813117	0.0783479
0.797388	0.0938621
0.853627	0.0878284
0.783965	0.0799823
0.66866	0.0784228
0.724741	0.0853028
0.763453	0.0853212
0.692372	0.0741036
0.774707	0.0783184
0.0362261	0.0081259
